1 ***Temporal variabilities provide additional category-related information***  
2 ***in object category decoding: a systematic comparison of informative***  
3 ***EEG features***

4  
5 Hamid Karimi-Rouzbahani<sup>1,2,3\*</sup>, Mozhgan Shahmohammadi<sup>4</sup>, Ehsan Vahab<sup>5</sup>, Saeed Setayeshi<sup>6</sup>,  
6 Thomas Carlson<sup>7,2</sup>

7 <sup>1</sup>Medical Research Council Cognition and Brain Sciences Unit, University of Cambridge, UK

8 <sup>2</sup>Perception in Action Research Centre and Department of Cognitive Science, Macquarie University, Australia

9 <sup>3</sup>Department of Computing, Macquarie University, Australia

10 <sup>4</sup>Department of Computer Engineering, Central Tehran Branch, Islamic Azad University, Iran

11 <sup>5</sup>Department of Computer and Information and Technology Engineering, Qazvin Branch, Islamic Azad University,  
12 Iran

13 <sup>6</sup>Department of Medical Radiation Engineering, Amirkabir University of Technology, Iran

14 <sup>7</sup>School of Psychology, University of Sydney, Australia

15 \* to whom correspondence should be addressed.

16

17 **Abstract**

18 How does the human brain encode visual object categories? Our understanding of this has advanced  
19 substantially with the development of multivariate decoding analyses. However, conventional  
20 electroencephalography (EEG) decoding predominantly use the “mean” neural activation within the  
21 analysis window to extract category information. Such temporal averaging overlooks the within-trial  
22 neural variability which is suggested to provide an additional channel for the encoding of information  
23 about the complexity and uncertainty of the sensory input. The richness of temporal variabilities,  
24 however, has not been systematically compared with the conventional “mean” activity. Here we  
25 compare the information content of 31 variability-sensitive features against the “mean” of activity, using  
26 three independent highly-varied datasets. In whole-trial decoding, the classical event-related potential  
27 (ERP) components of “P2a” and “P2b” provided information comparable to those provided by “Original  
28 Magnitude Data (OMD)” and “Wavelet Coefficients (WC)”, the two most informative variability-sensitive  
29 features. In time-resolved decoding, the “OMD” and “WC” outperformed all the other features  
30 (including “mean”), which were sensitive to limited and specific aspects of temporal variabilities, such as  
31 their phase or frequency. The information was more pronounced in Theta frequency band, previously  
32 suggested to support feed-forward visual processing. We concluded that the brain might encode the  
33 information in multiple aspects of neural variabilities simultaneously e.g. phase, amplitude and  
34 frequency rather than “mean” per se. In our active categorization dataset, we found that more effective  
35 decoding of the neural codes corresponds to better prediction of behavioral performance. Therefore,

36 the incorporation of temporal variabilities in time-resolved decoding can provide additional category  
37 information and improved prediction of behavior.

## 38 Keywords

39 object category processing; neural codes; multivariate pattern decoding; electroencephalography (EEG);  
40 feature extraction

## 41 Introduction

42 How does the brain encode information about visual object categories? This question has been studied  
43 for decades using different neural recording techniques including invasive neurophysiology (Hung et al.,  
44 2005) and electrocorticography (ECoG; Majima et al., 2014; Watrous et al., 2015; Rupp et al., 2017; Lie  
45 et al., 2009; Miyakawa et al., 2018; Liu et al., 2009), as well as non-invasive neuroimaging methods such  
46 as functional Magnetic Resonance Imaging (fMRI; Haxby et al., 2001), magnetoencephalography (MEG;  
47 Contini et al., 2017; Carlson et al., 2013) and electroencephalography (EEG; Kaneshiro et al., 2015;  
48 Simanova et al., 2010) or a combination of them (Cichy et al., 2014). There has been great success in  
49 “reading-out” or “decoding” neural representations of semantic object categories from neuroimaging  
50 data. However, it is still unclear if the conventional decoding analyses effectively detect the complex  
51 neural codes. Critically, one potential source of neural codes, in high-temporal-resolution data (e.g.  
52 EEG), can be the “within-trial/window temporal variability” of EEG signals, which is generally ignored  
53 through temporal averaging in decoding. The use of such summarized “mean” activity, can hide the true  
54 spatiotemporal dynamics of neural processes such as object category encoding, which is still debated in  
55 cognitive neuroscience (Grootswagers et al., 2019; Majima et al., 2014; Karimi-Rouzbahani et al., 2017b;  
56 Isik et al., 2013; Cichy et al., 2014). Here, we quantitatively compare the information content and the  
57 temporal dynamics of a large set of features from EEG time series, each sensitive to a specific aspect of  
58 within-trial temporal variability. We then evaluate the relevance of these features by measuring how  
59 well each one predicts behavioral performance.

60

61 Sensory neural codes are multiplexed structures containing information on different time scales and  
62 about different aspects of the sensory input (Panzeri et al., 2010; Wark et al., 2009; Gawne et al., 1996).  
63 Previous animal studies have shown that the brain does not only encode the sensory information in the  
64 neural firing rates (i.e. average number of neural spikes within specific time windows), but also in more  
65 complex patterns of neural activity such as millisecond-precise activity and phase (Kayser et al., 2009;  
66 Victor, 2000; Montemurro et al., 2008). It was shown that stimulus contrast was represented by latency  
67 coding at a temporal precision of ~10 ms, whereas the stimulus orientation and the spatial frequency  
68 were encoded at a coarser temporal precision (30 ms and 100 ms, respectively; Victor, 2000). It was  
69 shown that spike rates on 5-10-ms timescales carried complementary information to the phase of firing  
70 relative to low-frequency (1-8 Hz) LFPs about epoch of naturalistic movie (Montemurro et al., 2008).  
71 Therefore, the temporal patterns/variabilities of neural activity are enriched platforms of neural codes.

72

73 Recent computational and experimental studies have proposed that neural variability, provides a  
74 separate and additional channel to the “mean” activity, for the encoding of general aspects of the  
75 sensory information e.g. its “*uncertainty*” and “*complexity*” (Orbán et al., 2016; Garrett et al., 2020).

76 Specifically, *uncertainty* about the stimulus features (e.g. orientations of lines in the image) was directly  
77 linked to neural variability in monkeys' visual area (Orbán et al., 2016) and human EEG (Kosciessa et al.,  
78 2021): wider inferred range of possible feature combinations in the input stimulus corresponded to  
79 wider distribution of neural responses. This could be applied to both within- and across-trial variability  
80 (Orbán et al., 2016). Moreover, temporal variability was directly related to the *complexity* of input  
81 images: higher neural variability for house (i.e. more varied) vs. face (i.e. less varied) images (Garrett et  
82 al., 2020) and provided a reliable measure of perceptual performance in behavior (Waschke et al.,  
83 2019). The *uncertainty*- and *complexity*-dependent modulation of neural variability, which is linked to  
84 the category of input information, has been suggested to facilitate neural energy saving, adaptive and  
85 effective encoding of the sensory inputs in changing environments (Garrett et al., 2020; Waschke et al.,  
86 2021).

87

88 Despite the richness of information encoded by neural variabilities, the unclear transformation of such  
89 neuronal codes into EEG activity has led to divergent approaches used for decoding information from  
90 EEG. For example, the information in neural firing rates might appear in phase patterns rather than  
91 amplitude of EEG oscillations (Ng et al., 2013). Generally, three families of features have been extracted  
92 from EEG time series to detect neural codes from temporal variabilities (Waschke et al., 2021): variance-  
93 , frequency- and information theory-based features, each detecting specific aspects of variability. In  
94 whole-trial decoding, components of event-related potentials (ERPs) such as N1, P1, P2a and P2b, which  
95 quantify time-specific variabilities of within-trial activation, have provided significant information about  
96 object categories (separately and in combination; Chan et al., 2011; Wang et al., 2012; Qin et al., 2016).  
97 Others successfully decoded information from more complex variance- and frequency-based features  
98 such as signal phase (Behroozi et al., 2016; Watrous et al., 2015; Torabi et al., 2017; Wang et al., 2018;  
99 Voloh et al., 2020), signal power across frequency bands (Rupp et al., 2017; Miyakawa et al., 2018;  
100 Majima et al., 2014; Miyakawa et al., 2018), time-frequency Wavelet coefficients (Hatamimajoumerd  
101 and Talebpour, 2019; Taghizadeh-Sarabi et al., 2015), inter-electrode temporal correlations (Karimi-  
102 Rouzbahani et al., 2017a) and information-based features (e.g. entropy; Joshi et al., 2018; Torabi et al.,  
103 2017; Stam, 2005). Therefore, the neural codes are generally detected from EEG activity using a wide  
104 range of features sensitive to temporal variability.

105

106 While insightful, previous studies have also posed new questions about the relative richness, temporal  
107 dynamics and the behavioral relevance of different features of neural variability. First, can the features  
108 sensitive to temporal variabilities, provide additional category information to the conventional "mean"  
109 feature? While several of the above studies have compared multiple features (Chan et al., 2011;  
110 Taghizadeh-Sarabi et al., 2015; Torabi et al., 2016), none of them compared their results against the  
111 conventional "mean" activity, which is the dominant feature, especially in time-resolved decoding  
112 (Grootswagers et al., 2017). This comparison will not only validate the richness of each feature of neural  
113 variability but will also show if the mean activity detects a large portion of the neural codes produced by  
114 the brain. We predicted that the informative neural variabilities, if properly decoded, should provide  
115 additional information to the "mean" activity, which overlooks the temporal variability within the  
116 analysis window.

117

118 Second, do the features sensitive to temporal variabilities evolve over similar time windows to the  
119 “mean” feature? Among all the studies mentioned above, only a few investigated the temporal  
120 dynamics of features, other than the “mean” in *time-resolved* decoding (Majima et al., 2014; Stewart et  
121 al., 2014; Karimi-Rouzbahani et al., 2017a), where the temporal evolution of information encoding is  
122 studied (Grootswagers et al., 2017). As distinct aspects of sensory information (e.g. contrast vs. spatial  
123 frequency) are represented on different temporal scales (Victor, 2000; Montemurro et al., 2008) and  
124 different variability features are potentially sensitive to distinct aspects of variability, we might see  
125 differential temporal dynamics for different features.

126  
127 Third, do the features sensitive to temporal variabilities explain the behavioral recognition performance  
128 more accurately than the “mean” feature? One important question, which was not covered in the above  
129 studies, was whether the extracted information was behaviorally relevant or was it just epiphenomenal  
130 to the experimental conditions. One way of validating the relevance of the extracted neural codes is to  
131 check if they could predict the relevant behavior (Williams et al., 2007; Grootswagers et al., 2018;  
132 Woolgar et al., 2019). We previously found that the decoding accuracies obtained from “mean” signal  
133 activations could predict the behavioral recognition performance (Ritchie, et al., 2015). However, it  
134 remains unknown whether (if at all) the information obtained from temporal variabilities can explain  
135 more variance of the behavioral performance. Our prediction was that, as the more informative features  
136 access more of the potentially overlooked neural codes, they should also explain the behavioral  
137 performance more accurately.

138  
139 In this study, we address the above questions, to provide additional insights about what aspects of  
140 neural variabilities might reflect the neural codes more thoroughly and how we can extract them most  
141 effectively using multivariate decoding analyses.

142

## 143 **Methods**

144 The datasets used in this study and the code are available online at <https://osf.io/wbvnp/>. All the open-  
145 source scripts used in this study were compared against other implementations of identical algorithms  
146 in simulations and used only if they produced identical results. All open-source implementation scripts  
147 of similar algorithms produced identical results in our simulations. To evaluate different  
148 implementations, we tested them using 1000 random (normally distributed with unit variance and zero  
149 mean) time series each including 1000 samples.

150

### 151 **Overview of datasets**

152 We chose three previously published EEG datasets in this study, which differed across a wide range of  
153 parameters including the recording set-up (e.g. amplifier, number of electrodes, preprocessing steps,  
154 etc.), characteristics of the image-set (e.g. number of categories and exemplars within each category,  
155 colorfulness of images, etc.), and task (e.g. presentation length, order and the participants’ task; Table

156 1). All three datasets previously successfully provided object category information using multivariate  
157 analyses.

158

159 **Dataset 1.** We have previously collected Dataset 1 while participants were briefly (i.e. 50 ms)  
160 presented with gray-scale images from four synthetically-generated 3D object categories (Karimi-  
161 Rouzbahani et al., 2017a). The objects underwent systematic variations in scale, positional periphery, in-  
162 depth rotation and lighting conditions, which made perception difficult, especially in extreme variation  
163 conditions. Randomly ordered stimuli were presented in consecutive pairs (Figure 1, top row). The  
164 participant's task was unrelated to object categorization; they pressed one of two pre-determined  
165 buttons to indicate if the fixation dots, superimposed on the first and second stimuli, were the  
166 same/different color (2-alternative forced choice).

167

168 **Dataset 2.** We have collected Dataset 2 in an active categorization experiment, in which  
169 participants pressed a button if the presented object image was from a target category (go/no-go),  
170 which was cued at the beginning of each block of 12 stimuli (Karimi-Rouzbahani et al., 2019; Figure 1,  
171 middle row). The object images, which were cropped from real photographs, were part of the well-  
172 established benchmark image set for object recognition developed by Kiani et al., (2007). This image set  
173 has been previously used to extract object category information from both human and monkey brain  
174 using MEG (Cichy et al., 2014), fMRI (Cichy et al., 2014; Kriegeskorte et al., 2008) and single-cell  
175 electrophysiology (Kriegeskorte et al., 2008; Kiani et al., 2007).

176

177 **Dataset 3.** We also used another dataset (Dataset 3) which was not collected in our lab. This  
178 dataset was collected by Kaneshiro et al., (2015) on 6 sessions for each participant, from which we used  
179 the first session only, as it could represent the whole dataset (the next sessions were repetition of the  
180 same stimuli to increase signal to noise ratio) and we preferred to avoid potential effect of extended  
181 familiarity with the stimuli on neural representations. The EEG data was collected during passive viewing  
182 (participants had no task but to keep fixating on the central fixation cross; Figure 1, bottom row) of 6  
183 categories of objects with stimuli chosen from Kiani et al. (2007) as explained above. We used a pre-  
184 processed (i.e. band-pass-filtered in the range 0.03 to 50 Hz) version of the dataset which was available  
185 online<sup>1</sup>.

---

<sup>1</sup> <https://purl.stanford.edu/tc919dd5388>

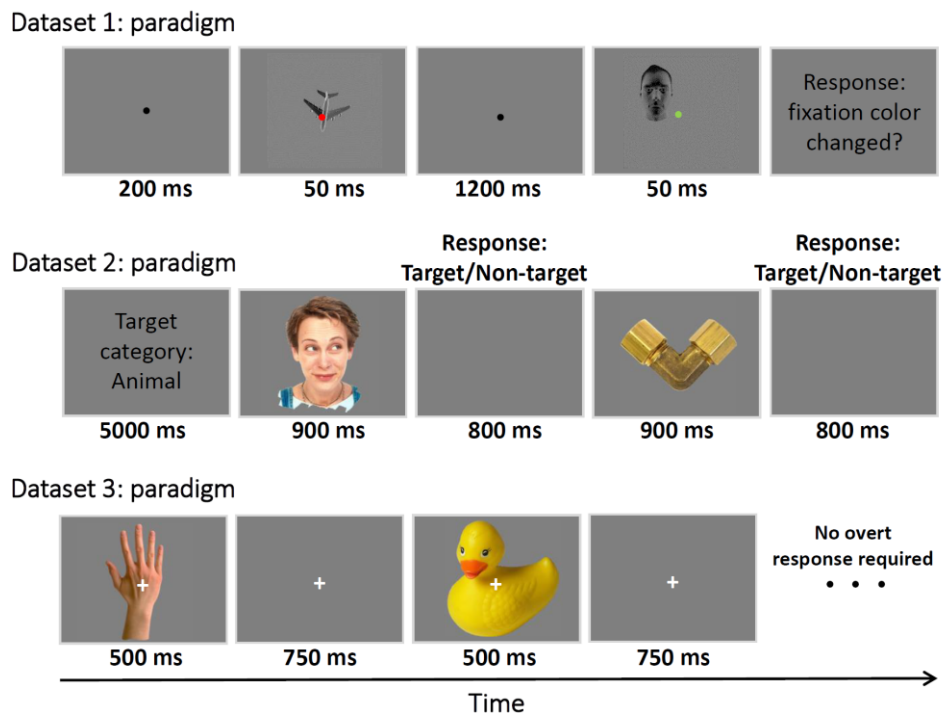

**Figure 1.** Paradigms of the datasets used in this study. Dataset 1 (top row) presented two consecutive object images each with a fixation dot. Participants' task was to indicate if the fixation dot was the same or different colors across the image pairs (passive task). Dataset 2 (middle row) presented objects from the target and non-target categories in sequences of 12 images. Participant's task was to indicate, for each image, if it was from the target/non-target category (active task). Dataset 3 (bottom row), presented sequences of object images from 6 different categories. Participants did not have any specific tasks, except for looking at the center of the image (no overt task). See more details about the datasets in the relevant references provided in Table 1.

186

187 All the three datasets were collected at a sampling rate of 1000 Hz. For Datasets 1 and 2, only the trials  
188 which led to correct responses by participants, were used in the analyses. Each dataset consisted of data  
189 from 10 participants. Each object category in each dataset included 12 exemplars. To make the three  
190 datasets as consistent as possible, we pre-processed them differently from their original papers.  
191 Specifically, the band-pass filtering range of Dataset 3 was 0.03 to 50 Hz, and we did not have access to  
192 the raw data to increase the upper cutting frequency to 200 Hz. Datasets 1 and 2 were band-pass-  
193 filtered in the range from 0.03 to 200 Hz before the data was split into trials. We also applied 50 Hz  
194 notch filters to Datasets 1 and 2 to remove line noise. Next, we generated different versions of the data  
195 by band-pass filtering the data in Delta (0.5-4 Hz), Theta (4-8 Hz), Alpha (8-12 Hz), Beta (12-16 Hz),  
196 Gamma (16-200Hz) bands to see if there is any advantage for the suggested Theta or Delta frequency  
197 bands (Watrous et al., 2015; Behroozi et al., 2016; Wang et al., 2018). We used finite-impulse-response  
198 (FIR) filters with 12 dB roll-off per octave for band-pass filtering of Datasets 1 and 2 and when evaluating  
199 the sub-bands of the three datasets. All the filters were applied before splitting the data into trials.

200

201 We did not remove artifacts (e.g. eye-related and movement-related) from the signals, as we and others  
202 have shown that sporadic artifacts have minimal effect in multivariate decoding (Grootswagers et al.,

203 2017). To increase signal to noise ratios in the analyses, each unique stimulus had been presented to the  
204 participants 3, 6 and 12 times in Datasets 1, 2 and 3, respectively. Trials were defined in the time  
205 window from 200 ms before to 1000 ms after the stimulus onset to cover most of the range of event-  
206 related neural activations. The average pre-stimulus (-200 to 0 ms relative to the stimulus onset) signal  
207 amplitude was removed from each trial of the data. For more information about each dataset see Table  
208 1 and the references to their original publications.

209

210 **Table 1.** Details of the three datasets used in this study.

| Dataset                           | # electrodes | Band-pass filtering | Notch filtering | # object categories | # stimulus repetition | Stimulus presentation time | Stimulus size (periphery) | Task                               | Participants' accuracy | Participants' Age (median) | Participants' gender |
|-----------------------------------|--------------|---------------------|-----------------|---------------------|-----------------------|----------------------------|---------------------------|------------------------------------|------------------------|----------------------------|----------------------|
| 1 Karimi-Rouzbahani et al., 2017a | 31           | 0.03-200 Hz         | 50 Hz           | 4                   | 3                     | 50 ms                      | 2~13.5° (0.7~8.8°)        | Color matching (passive)           | %94.68                 | 22.1                       | 7 male<br>3 female   |
| 2 Karimi-Rouzbahani et al., 2019  | 31           | 0.03-200 Hz         | 50 Hz           | 4                   | 6                     | 900 ms                     | 8° × 8° (0)               | Object category detection (active) | %94.65                 | 26.4                       | 6 male<br>4 female   |
| 3 Kaneshiro et al., 2015          | 128          | 0.03-50 Hz          | No              | 6                   | 12                    | 500 ms                     | 7.0° × 6.5° (0)           | No task (fixation)                 | N/A                    | 30.5                       | 7 male<br>3 female   |

211

212

## 213 Features

214 EEG signals are generated by inhibitory and excitatory post-synaptic potentials of cortical neurons.  
215 These potentials extend to the scalp surface and are recorded through electrodes as amplitudes of  
216 voltage in units of microvolts. Researchers have been using different aspects of these voltage recordings  
217 to obtain meaningful information about human brain processes. The main focus of this study is to  
218 compare the information content of features which are sensitive to temporal variabilities of neural  
219 activations against the “mean” of activity within the analysis window, which is conventionally used in  
220 decoding analysis (Grootswagers et al., 2017). Below we explain the mathematical formulas for each  
221 individual feature used in this study. We also provide brief information about potential underlying  
222 neural mechanisms which can lead to the information content provided by each feature.

223

224 We classified the features into five classes based on their mathematical similarity to simplify the  
225 presentation of the results and their interpretations. The five classes consist of Moment, Complexity,  
226 ERP, Frequency-domain and Multi-valued features. However, the classification of the features is not  
227 strict and the features might be classified based on other criteria and definitions. For example,  
228 complexity itself has different definitions (Tononi et al., 1998), such as degree of randomness, or  
229 degrees of freedom in a large system of interacting elements. There are also recent studies which split  
230 the variability features into the three categories of variance-, frequency- and information theory-based  
231 categories (Waschke et al., 2021). Therefore, each definition may exclude or include some of our  
232 features in the class. It is of note that, we only used the features which were previously used to decode  
233 categories of evoked potentials from EEG signals through multivariate decoding analysis. Nonetheless,

234 there are definitely other features available, especially, those extracted from EEG time series collected  
235 during long-term monitoring of human neural representations in health and disorder (Fulcher and Jones,  
236 2017). In presenting the features' formulas, we avoided repeating the terms from the first feature to the  
237 last one. Therefore, the reader might need to go back a few steps/features to find the definitions of the  
238 terms. Note that, in this study, the analyses are performed in either 1000 ms time windows (i.e. number  
239 of samples used for feature extraction:  $N = 1000$ ) in the whole-trial analysis or 50 ms time windows  
240 ( $N = 50$ ) in time-resolved analysis.

241

## 242 **Moment features**

243 These features are the most straightforward and intuitive features from which we might be able to  
244 extract information about neural processes. Mean, Variance, Skewness and Kurtosis are the 1<sup>st</sup> to 4<sup>th</sup>  
245 moments of EEG time series and can provide information about the shape of the signals and their  
246 deviation from stationarity, which is the case in evoked potentials (Rasoulzadeh et al., 2016; Wong et al.,  
247 2006). These moments have been shown to be able to differentiate visually evoked responses  
248 (Pouryzdian and Erfaninan, 2010; Alimardani et al., 2018). The 2<sup>nd</sup> to 4<sup>th</sup> moments are also categorized as  
249 variance-based features in recent studies (Waschke et al., 2021).

250

### 251 *Mean*

252 Mean amplitude of an EEG signal changes in proportion to the neural activation of the brain. It is by far  
253 the most common feature of the recorded neural activations used in analyzing brain states and cognitive  
254 processes both in univariate and multivariate analyses (Vidal et al., 2010; Hebart and Baker, 2017;  
255 Grootswagers et al., 2017; Karimi-Rouzbahani et al., 2019). In EEG, the brain activation is reflected as the  
256 amplitude of the recorded voltage across each electrode and the reference electrode at specific time  
257 points. To calculate the Mean feature, which is the first moment in statistics, the sample mean is  
258 calculated for each recorded EEG time series as:

$$259 \quad \bar{x} = \frac{1}{N} \sum_{t=1}^N x_t \quad (1)$$

260 where  $\bar{x}$  is the mean of the  $N$  time samples contained in the analysis window and  $x_t$  refers to the  
261 amplitude of the recorded sample at time point  $t$ .  $N$  can be as small as unity as in the case of time-  
262 resolved EEG analysis (Grootswagers et al., 2017) or as large as it can cover the whole trial in whole-trial  
263 analysis. Accordingly, we set  $N = 1000$  (i.e. 1000 ms) and  $N = 50$  (i.e. 50 ms) for the whole-trial and time-  
264 resolved decoding analyses, respectively.

265

### 266 *Median*

267 Compared to the Mean feature, Median is less susceptible to outliers (e.g. spikes) in the time series,  
268 which might not come from neural activations but rather from artifacts caused by the recording  
269 hardware, preprocessing, eye-blinks, etc. Median is calculated as:

$$270 \quad \text{Median}(X) = \begin{cases} X \left[ \frac{N}{2} \right] & \text{if } N \text{ is even} \\ \frac{(X \left[ \frac{N-1}{2} \right] + X \left[ \frac{N+1}{2} \right])}{2} & \text{if } N \text{ is odd} \end{cases} \quad (2)$$



271 where  $X$  is the ordered values of samples in the time series  $x_t$  for  $t = 1, \dots, N$ .

272

### 273 *Variance*

274 Variance of an EEG signal is one simplest indicators showing how much the signal is deviated from  
275 stationarity i.e. deviated from its original baseline statistical properties (Wong et al., 2006). It is a  
276 measure of signal variabilities (within-trial here), has been shown to decline upon the stimulus onset  
277 potentially as a result of neural co-activation and has provided information about object categories in a  
278 recent EEG decoding study (Karimi-Rouzbahani et al., 2017a). Variance is calculated as:

$$279 \sigma^2 = \frac{1}{N} \sum_{t=1}^N (x_t - \bar{x})^2 \quad (3)$$

280

### 281 *Skewness*

282 While Variance is silent about the direction of the deviation from the mean, Skewness, which is the third  
283 signal moment, measures the degree of asymmetry in the signal's probability distribution. In symmetric  
284 distribution (i.e. when samples are symmetric around the mean) skewness is zero. Positive and negative  
285 skewness indicates right- and left-ward tailed distribution, respectively. As the visually evoked ERP  
286 responses usually tend to be asymmetrically deviated in either positive or negative direction, even after  
287 baseline correction (Mazaheri and Jensen, 2008), we assume that Skewness should provide information  
288 about the visual stimulus if each category modulates the deviation of the samples differentially.  
289 Skewness is calculated as:

$$290 \gamma_1 = \frac{1}{N} \sum_{t=1}^N \left( \frac{x_t - \bar{x}}{\sigma} \right)^3 \quad (4)$$

291

### 292 *Kurtosis*

293 Kurtosis reflects the degree of "tailedness" or "flattedness" of the signal's probability distribution.  
294 Accordingly, the more heaviness in the tails, the less value of the Kurtosis and vice versa. Based on  
295 previous studies, Kurtosis has provided distinct representations corresponding to different classes of  
296 visually evoked potentials (Alimardani et al., 2018; Pourydzian and Erfanian, 2010). We test to see if  
297 Kurtosis plays a more generalized role in information coding e.g. coding of semantic aspects of visual  
298 information as well. It is the fourth standardized moment of the signal defined as:

$$299 Kurt = \frac{1}{N} \sum_{t=1}^N \left( \frac{x_t - \bar{x}}{\sigma} \right)^4 \quad (5)$$

300

### 301 *Complexity features*

302 There can potentially be many cases in which simple moment statistics such as Mean, Median, Variance,  
303 Skewness and Kurtosis, which rely on distributional assumptions, provide equal values for distinct time  
304 series (e.g. series A: 10, 20, 10, 20, 10, 20, 10, 20 vs. series B: 20, 20, 20, 10, 20, 10, 10, 10) for both of  
305 which the five above-mentioned features provide equal results. Therefore, we need more complex and  
306 possibly nonlinear measures which can detect subtle but meaningful temporal patterns from time  
307 series. The analysis of nonlinear signal features has recently been growing, following the findings  
308 showing that EEG reflects weak but significant nonlinear structures (Stam, 2005; Stepien, 2002).

309 Importantly, many studies have shown that the complexity of EEG time series can significantly alter  
310 during cognitive tasks such as visual (Bizas et al., 1999) and working memory tasks (Sammer et al., 1999;  
311 Stam, 2000). Therefore, it was necessary to evaluate the information content of nonlinear features for  
312 our decoding of object categories. As mentioned above, the grouping of these nonlinear features as  
313 “complexity” here is not strict and the features included in this class are those which capture complex  
314 and nonlinear patterns across time series. Although the accurate detection of complex and nonlinear  
315 patterns generally need more time samples compared to linear patterns (Procaccia, 1988), it has been  
316 shown that nonlinear structures can be detected from short EEG time series as well (i.e. through fractal  
317 dimensions; Preißl et al., 1997). Nonetheless, we extract these features from both time-resolved (50  
318 samples) and whole-trial data (1000 samples) to ensure we do not miss potential information  
319 represented in longer temporal scales.

320

### 321 *Lempel-Ziv complexity (LZ Cmplx)*

322 Lempel-Ziv complexity measures the complexity of time series (Lempel et al., 1976). Basically, the  
323 algorithm counts the number of unique sub-sequences within a larger binary sequence. Accordingly, a  
324 sequence of samples with a certain regularity does not lead to a large LZ complexity. However, the  
325 complexity generally grows with the length of the sequence and its irregularity. In other words, it  
326 measures the generation rate of new patterns along a digital sequence. In a comparative work, it was  
327 shown that, compared to many other frequency metrics of time series (e.g. noise power, stochastic  
328 variability, etc.), LZ complexity has the unique feature of providing a scalar estimate of the bandwidth of  
329 time series and the harmonic variability in quasi-periodic signals (Aboy et al., 2006). It is widely used in  
330 biomedical signal processing and has provided successful results in the decoding of visual stimuli from  
331 neural responses in primary visual cortices (Szczepański et al., 2003). We used the code by Quang Thai<sup>2</sup>  
332 implemented based on “exhaustive complexity” which is considered to provide the lower limit of the  
333 complexity as explained by Lempel et al. (1976). We used the signal median as a threshold to convert  
334 the signals into binary sequences for the calculation of LZ complexity. The LZ complexity provided a  
335 single value for each signal time series.

336

### 337 *Fractal dimension*

338 In signal processing, fractal is an indexing technique which provides statistical information about the  
339 complexity of time series. A higher fractal value indicates more complexity for a sequence as reflected in  
340 more nesting of repetitive sub-sequences at all scales. Fractal dimensions are widely used to measure  
341 two important attributes: self-similarity and the shape of irregularity. A growing set of studies have  
342 been using fractal analyses for the extraction of information about semantic object categories (such as  
343 living and non-living categories of visual objects; Ahmadi-Pajouh et al., 2018; Torabi et al., 2017) as well  
344 as simple checkerboard patterns (Namazi et al., 2018) from visually evoked potentials. In this study, we  
345 implemented two of the common methods for the calculation of fractal dimensions of EEG time series,

---

<sup>2</sup> [https://www.mathworks.com/matlabcentral/fileexchange/38211-calc\\_lz\\_complexity](https://www.mathworks.com/matlabcentral/fileexchange/38211-calc_lz_complexity)

346 which have been previously used to extract information about object categories as explained below. We  
 347 used the implementations by Jesús Monge Álvarez<sup>3</sup> for fractal analysis.

348

349 • **Higuchi's fractal dimension (Higuchi FD)**

350 In this method (Higuchi et al., 1988), a set of sub-sequences  $x_k^m$  is generated in which  $k$  and  $m$  refer to  
 351 the step size and initial value, respectively. Then, the length of this fractal dimension is calculated as:

$$352 \quad L_k^m = \frac{\left\{ \sum_{i=1}^{\lfloor \frac{N-m}{k} \rfloor} |x_{(m+ik)} - x_{(m+(i-1).k)}| \right\} \lfloor \frac{N-1}{k} \rfloor}{k} \quad (6)$$

353 where  $\frac{N-1}{\lfloor \frac{N-m}{k} \rfloor . k}$  is the normalization factor. The length of the fractal curve at step size of  $k$  is

354 calculated by averaging  $k$  sets of  $L_k^m$ . Finally, the resultant average will be proportional to  $k^{-D}$   
 355 where  $D$  is the fractal dimension. We set the free parameter of  $k$  equal to half the length of signal time  
 356 series in the current study.

357

358 • **Katz's fractal dimension (Katz FD)**

359 We also calculated fractal dimension using the Katz's method (Katz, 1988) as it showed a significant  
 360 amount of information about object categories in a previous study (Torabi et al., 2017). The fractal  
 361 dimension ( $D$ ) is calculated as:

$$362 \quad D = \frac{\log_{10}\left(\frac{L}{a}\right)}{\log_{10}\left(\frac{d}{L}\right) + \log_{10}r} = \frac{\log_{10}r}{\log_{10}\left(\frac{d}{L}\right) + \log_{10}r} \quad (7)$$

363 where  $L$  and  $a$  refer to the sum and average of the consecutive signal samples, respectively. Also  $d$   
 364 refers to the maximum distance between first sample and  $i^{th}$  sample of the signal which has the  
 365 maximum distance from first sample as:

$$366 \quad L = \sum_{i=2}^N |x_i - x_{i-1}| \quad (8)$$

$$367 \quad d = \max(\text{distance}(1, i)) \quad (9)$$

$$368 \quad r = L/a \quad (10)$$

369

370 *Hurst exponent (Hurst Exp)*

371 Hurst exponent is widely used to measure the long-term memory in time-dependent random variables  
 372 such as biological time series (Racine, 2011). In other words, it measures the degree of interdependence  
 373 across samples in the time series and operates like an autocorrelation function over time. Hurst values  
 374 between 0.5 and 1 suggest consecutive appearance of high signal values on large time scales while  
 375 values between 0 and 0.5 suggest frequent switching between high and low signal values. Values around

<sup>3</sup> <https://ww2.mathworks.cn/matlabcentral/fileexchange/50290-higuchi-and-katz-fractal-dimension-measures>

376 0.5 suggest no specific patterns among samples of a time series. It is defined as an asymptotic behavior  
377 of a rescaled range as a function of the time span of the time series defined as:

$$378 \quad E \left[ \frac{\max(z_1, z_2, \dots, z_N) - \min(z_1, z_2, \dots, z_N)}{\sqrt{\frac{1}{N} \sum_{t=1}^N (x_t - \bar{x})^2}} \right] = C \cdot N^H \text{ as } N \rightarrow \infty \quad (11)$$

379

$$380 \quad z_t = \sum_{i=1}^t y_i ; t = 1, \dots, N \quad (12)$$

$$381 \quad y_t = x_t - \bar{x} \quad (13)$$

382 where  $E$  is the expected value,  $C$  is a constant and  $H$  is the Hurst exponent (Racine, 2011). We used the  
383 open-source implementation of the algorithm<sup>4</sup>, which has also been used previously for the decoding of  
384 object category information in EEG (Torabi et al., 2017).

385

### 386 *Entropy*

387 Entropy can measure the perturbation in time series (Waschke et al., 2021). A higher value for entropy  
388 suggests a higher irregularity in the given time series. Precise calculation of entropy usually requires  
389 considerable number of samples and is also sensitive to noise. Here we used two methods for the  
390 calculation of entropy, each of which has its advantages over the other.

391

#### 392 • **Approximate entropy (Aprpx Ent)**

393 Approximate entropy was initially developed to be used for medical data analysis (Pincus and Huang,  
394 1992), such as heart rate, and then was extended to other areas such as brain data analysis. It has the  
395 advantage of requiring a low computational power which makes it perfect for real-time applications on  
396 low sample sizes (<50). However, the quality of this entropy method is impaired on lower lengths of the  
397 data. This metric detects changes in episodic behavior which are not represented by peak occurrences  
398 or amplitudes (Pincus and Huang, 1992). We used an open-source code<sup>5</sup> for calculating approximate  
399 entropy. We set the embedded dimension and the tolerance parameters to 2 and 20% of the standard  
400 deviation of the data respectively, to roughly follow a previous study (Shourie et al., 2014) which  
401 compared approximate entropy in visually evoked potentials and found differential effects across artist  
402 vs. non-artist participants when looking at paintings.

403

#### 404 • **Sample entropy (Sample Ent)**

405 Sample entropy, which is a refinement of the approximate entropy, is frequently used to calculate  
406 regularity of biological signals (Richman et al., 2000). Basically, it is the negative natural logarithm of the  
407 conditional probability that two sequences (subset of samples), which are similar for  $m$  points remain

---

<sup>4</sup> <https://www.mathworks.com/matlabcentral/fileexchange/9842-hurst-exponent>

<sup>5</sup> <https://www.mathworks.com/matlabcentral/fileexchange/32427-fast-approximate-entropy>

408 similar at the next point. A lower sample entropy also reflects a higher self-similarity in the time series. It  
409 has two main advantages to the approximate entropy: it is less sensitive to the length of the data and is  
410 simpler to implement. However, it does not focus on self-similar patterns in the data. We used the  
411 Matlab “entropy” function for the extraction of this feature, which has already provided category  
412 information in a previous study (Torabi et al., 2017). See (Richman et al., 2000; Subha et al., 2010) for  
413 the details of the algorithm.

414

#### 415 *Autocorrelation (Autocorr)*

416 Autocorrelation determines the degree of similarity between the samples of a given time series and a  
417 time-lagged version of the same series. It detect periodic patterns in signals, which is an integral part of  
418 EEG time series. Therefore, following recent successful attempts in decoding neural information using  
419 the autocorrelation function from EEG signals (Wairagkar et al., 2016), we evaluated the information  
420 content of the autocorrelation function in decoding visual object categories. As neural activations reflect  
421 many repetitive patterns across time, the autocorrelation function can quantify the information  
422 contents of those repetitive patterns. Autocorrelation is calculated as:

$$423 \quad R(\tau) = \frac{1}{(N-\tau)\sigma^2} \sum_{t=1}^{N-\tau} (x_t - \bar{x})(x_{t+\tau} - \bar{x}) \quad (14)$$

424

425 where  $\tau$  indicates the number of lags in samples of the shifted signal. A positive value for  
426 autocorrelation indicates a strong relationship between the original time series and its shifted version,  
427 whereas a negative autocorrelation refers to an opposite pattern between them. Zero autocorrelation  
428 indicates no relationship between the original time series and its shifted version. In this study, we  
429 extracted autocorrelations for 30 consecutive lags ( $[\tau=1, 2, \dots, 30]$ ) used their average in classification.  
430 Please note that each lag refers to 1 ms as the data was sampled at 1000 Hz.

431

#### 432 *Hjorth parameters*

433 Hjorth parameters are descriptors of statistical properties of signals introduced by Hjorth (1970). These  
434 parameters are widely used in EEG signal analysis for feature extraction across a wide set of applications  
435 including visual recognition (Joshi et al., 2018; Torabi et al., 2017). These features consist of Activity,  
436 Mobility and Complexity as defined below. As the Activity parameter is equivalent to the signal Variance,  
437 which we already explained, we do not repeat it.

438

#### 439 • **Hjorth complexity (Hjorth Cmp)**

440 It determines the variation in time series’ frequency by quantifying the similarity between the signal and  
441 a pure sine wave leading to a value of 1 in case of perfect match. In other words, values around 1  
442 suggest lower complexity for a signal. It is calculated as:

$$443 \quad Complexity = \frac{Mobility \left( \frac{dx_t}{dt} \right)}{Mobility (x_t)} \quad (15)$$

444

445 • **Hjorth mobility (Hjorth Mob)**

446 It determines the proportion of standard deviation of the power spectrum as is calculated below, where  
447 *var* refers to the signal variance.

$$448 \text{Mobility} = \sqrt{\frac{\text{var}\left(\frac{dx_t}{dt}\right)}{\text{var}(x_t)}} \quad (16)$$

449 where *var* refers to the variance.

450

451 **ERP components (N1, P1, P2a and P2b)**

452 An ERP is a measured brain response to a specific cognitive, sensory or motor event that provides an  
453 approach to studying the correlation between the event and neural processing. According to the latency  
454 and amplitude, ERP is split into specific sub-windows called components. Here, we extracted ERP  
455 components by calculating mean of signals in specific time windows to obtain the P1 (80 to 120 ms), N1  
456 (120 to 200 ms), P2a (150 to 220 ms) and P2b (200 to 275 ms) components, which were shown  
457 previously to provide significant amounts of information about visual object and face processing in  
458 univariate (Rossion et al., 2000; Rousselet et al., 2007) and multivariate analyses (Chan et al., 2011;  
459 Jadidi et al., 2016; Wang et al., 2012). As these components are calculated in limited and specific time  
460 windows, in the whole-trial analysis, they reflect “Mean” of activity in their specific time windows,  
461 rather than the whole post-stimulus window. They will be also absent from time-resolved analyses by  
462 definition.

463

464 **Frequency-domain features**

465 Neural variability is commonly analyzed in frequency domain by calculating spectral power across  
466 frequency bands. Specifically, as data transformation from time to frequency domain is almost lossless  
467 using Fourier transform, oscillatory power basically reflects frequency-specific variance (with the total  
468 power reflecting the overall variance of the time series (Waschke et al., 2021)). Motivated by previous  
469 studies showing signatures of object categories in the frequency domain (Behroozi et al., 2016; Rupp et  
470 al., 2017; Iranmanesh and Rodriguez-Villegas, 2017; Joshi et al., 2018; Jadidi et al., 2016) and the  
471 representation of temporal codes of visual information in the frequency domain (Eckhorn et al., 1988),  
472 we also extracted frequency-domain features to see if they could provide additional category-related  
473 information to time-domain features. It is of note that, while the whole-trial analysis allows us to  
474 compare our results with previous studies, the evoked EEG potentials are generally nonstationary (i.e.  
475 their statistical properties change along the trial), and potentially dominated by low-frequency  
476 components. Therefore, the use of time-resolved analysis, which looks at more stationary sub-windows  
477 of the signal (e.g. 50 samples here), will allow us to detect subtle high-frequency patterns of neural  
478 codes.

479

#### 480 *Signal power (Signal Pw)*

481 Power spectrum density (PSD) represents the intensity or the distribution of the signal power into its  
482 constituent frequency components. This feature was motivated by previous studies showing  
483 associations between aspects of visual perception and power in certain frequency bands (Rupp et al.,  
484 2017; Behroozi et al., 2016; Majima et al., 2014). According to the Fourier analysis, signals can be broken  
485 into its constituent frequency components or a spectrum of frequencies in a specific frequency range.  
486 Here, we calculated signal power using the PSD as in (17).

$$487 \tilde{S}_{xx}(w) = \frac{(\Delta t)^2}{T} \left| \sum_{n=1}^N x_n e^{-iwn\Delta t} \right|^2 \quad (17)$$

488 where  $x_n = x_{n\Delta t}$  is signal sampled at a rate of  $T = \frac{1}{\Delta t}$  and  $w$  is the frequency at which the signal power  
489 is calculated. As signal power is a relatively broad term, including the whole power spectrum of the  
490 signal, we also extracted a few more parameters from the signal frequency representation to see what  
491 specific features in the frequency domain (if any) can provide information about object categories.

492

#### 493 *Mean frequency (Mean Freq)*

494 Motivated by the successful application of mean and median frequencies in the analysis of EEG signals  
495 and their relationship to signal components in the time domain (Intrilligator and Polich, 1995;  
496 Abootalebi et al., 2009), we extracted these two features from the signal power spectrum to obtain a  
497 more detailed insight into the neural dynamics of category representations. Mean frequency is the  
498 average of the frequency components available in a signal. Assume a signal consisting of two frequency  
499 components of  $f_1$  and  $f_2$ . The Mean frequency of this signal is  $f_{mean} = \frac{f_1 + f_2}{2}$ . Generally, the mean  
500 normalized (by the intensity) frequency is calculated using the following formula:

$$501 f_{mean} = \frac{\sum_{i=0}^n l_i f_i}{\sum_{i=0}^n l_i} \quad (18)$$

502 where  $n$  is the number of splits of the PSD,  $f_i$  and  $l_i$  are the frequency and the intensity of the PSD in its  
503  $i^{th}$  slot, respectively. It was calculated using Matlab “meanfreq” function.

504

#### 505 *Median frequency (Med Freq)*

506 Median frequency is the median normalized frequency of the power spectrum of a time-domain signal.  
507 It is calculated similarly to the signal median in the time domain, however, here the values are the  
508 power intensity in different frequency bins of the PSD. This feature was calculated using Matlab  
509 “medfreq” function.

510

#### 511 *Power and Phase at median frequency (Pw MdFrq and Phs MdFrq)*

512 Interestingly, apart from the median frequency itself, which reflects the frequency aspect of the power  
513 spectrum, the power and phase of the signal at the median frequency have also been shown to be  
514 informative about aspects of human perception (Joshi et al., 2018; Jadidi et al., 2016). Therefore, we  
515 also calculated the power and phase of the frequency-domain signals at the median frequency as  
516 features.

517

#### 518 *Average frequency (Avg Freq)*

519 Evoked potentials show a few number of positive and negative peaks after the stimulus onset, and they  
520 might show deviation in the positive or negative directions depending on the information content  
521 (Mazaheri and Jensen, 2008). Therefore, we also evaluated the Average (zero-crossing) frequency of the  
522 ERPs by counting the number of times the signal swapped signs during the trial. Note that each trial is  
523 baselined according to the average amplitude of the same trial in the last 200 ms immediately before  
524 the stimulus onset. We calculated the average frequency on the post-stimulus time window.

525

#### 526 *Spectral edge frequency (SEF 95%)*

527 SEF is a common feature used in monitoring the depth of anesthesia and stages of sleep using EEG  
528 (Iranmanesh and Rodriguez-Villegas, 2017). It measures the frequency which covers X percent of the  
529 PSD. X is usually set between 75% to 95%. Here we set X to 95%. Therefore, this reflects the frequency  
530 observed in a signal which covers 95% of a signal power spectrum.

531

#### 532 *Multi-valued features*

533 The main hypothesis of the present study is that, we can potentially obtain more information about  
534 object categories as well as behavior if we take into account the temporal variability of neural activity  
535 within the analysis window (i.e. trial) rather than averaging the samples as in conventional decoding  
536 analyses. While the above variability-sensitive features return a single value from each individual time  
537 series (analysis window), a more flexible feature would allow as many informative patterns to be  
538 detected from an individual time series. Therefore, we extracted other features, which provide more  
539 than one value per analysis window, so that we can select the most informative values from across  
540 electrodes and time points simultaneously (see *Dimensionality reduction* below). We also included the  
541 Original Magnitude Data as our reference feature, so that we know how much (if at all) our feature  
542 extraction and selection procedures improved decoding.

543

#### 544 *Inter-electrode correlation (Cross Corr)*

545 Following up on recent studies, which have successfully used inter-area correlation in decoding object  
546 category information from EEG activations (Majima et al., 2014; Karimi-Rouzbahani et al., 2017a;  
547 Tafreshi et al., 2019), we extracted inter-electrode correlation to measure the similarity between pairs  
548 of signals, here, from different pairs of electrodes. This feature of correlated variability, quantifies co-  
549 variability of neural activations across pairs of electrodes. Although closer electrodes tend to provide  
550 more similar (and therefore correlated) activation, compared to further electrodes (Hacker et al., 2017),  
551 the inter-electrode correlation can detect correlations which are functionally relevant and are not  
552 explained by the distance (Karimi-Rouzbahani et al., 2017a). This feature detects similarities in temporal  
553 patterns of fluctuations across time between pairs of signals, which . It is calculated as:

$$554 R_{xy} = \frac{1}{N\sigma_x\sigma_y} \sum_{t=1}^N (x_t - \bar{x})(y_t - \bar{y}) \quad (19)$$



555 where  $x$  and  $y$  refer to the signals obtained from electrodes  $x$  and  $y$ , respectively. We calculated the  
556 cross-correlation between each electrode and all the other electrodes to form a cross-correlation  
557 matrix. Accordingly, we initially obtained all the unique possible pairwise inter-electrode correlations  
558 (465, 465 and 8128 unique values for Datasets 1, 2 and 3, respectively), which were then reduced in  
559 dimension using PCA to the equal number of dimensions obtained for single-valued features.

560

#### 561 *Wavelet transform (Wavelet)*

562 Recent studies have shown remarkable success in decoding of object categories using the Wavelet  
563 transformation of the EEG time series (Taghizadeh-Sarabi et al., 2015; Torabi et al., 2017). Considering  
564 the time- and frequency-dependent nature of ERPs, Wavelet transform seems to be a very reasonable  
565 choice as it provides a time-frequency representation of signal components. It determines the primary  
566 frequency components and their temporal position in time series. The transformation passes the signal  
567 time series through digital filters (Guo et al., 2009; equation (20)), using the convolution operator, each  
568 of which adjusted to extract a specific frequency (scale) at a specific time as in (20):

$$569 \quad y_n = (x * g) = \sum_{k=-\infty}^{+\infty} x_k g_{n-k} \quad (20)$$

570

571 where  $g$  is the digital filter and  $*$  is the convolution operator. This filtering procedure is repeated for  
572 several rounds (levels) filtering low- (approximations) and high-frequency (details) components of the  
573 signal to provide more fine-grained information about the constituent components of the signal. This  
574 can lead to coefficients which can potentially discriminate signals evoked by different conditions.  
575 Following up on a previous study (Taghizadeh-Sarabi et al., 2015), and to make the number of Wavelet  
576 features comparable in number to signal samples, we used detail coefficients at five levels  $D1, \dots, D5$  as  
577 well as the approximate coefficients at level 5,  $A5$ . This led to 1015 and 57 features in the whole-trial  
578 and in the 50 ms sliding time windows, respectively. We used the “*Symlet2*” basis function for our  
579 Wavelet transformations as implemented in Matlab.

580

#### 581 *Hilbert transform (Hilb Amp and Hilb Phs)*

582 Hilbert transform provides amplitude and phase information about the signal and has recently shown  
583 successful results in decoding visual letter information from ERPs (Wang et al., 2018). The phase  
584 component of the Hilbert transform can qualitatively provide the spatial information obtained from the  
585 Wavelet transform leading to their similarity evaluating neuronal synchrony (Le Van Quyen et al., 2001).  
586 However, it is still unclear which method can detect category-relevant information from the  
587 nonstationary ERP components more effectively. Hilbert transform is described as a mapping function  
588 that receives a real signal  $x_t$  (as defined above), and upon convolution with the function  $\frac{1}{\pi t}$ , produces  
589 another function of a real variable  $H(x)(t)$  as:

$$590 \quad H(x)(t) = \frac{1}{\pi} \int_{-\infty}^{+\infty} \frac{x_\tau}{t-\tau} d\tau \quad (21)$$

591

592 where  $H(x)(t)$  is a frequency-domain representation of the signal  $x_t$ , which has simply shifted all the  
593 components of the input signal by  $\frac{\pi}{2}$ . Accordingly, it produces one amplitude and one phase component  
594 per samples in the time series. In the current study, Hilbert transform was applied on 1000 and 50  
595 samples in the whole-trial and time-resolved analysis, respectively. We used the amplitude and phase  
596 components separately to discriminate object categories in the analyses.

597

#### 598 *Amplitude- and Phase-locking (Amp Lock and Phs Lock)*

599 Although inter-electrode correlated variability (*Cross Corr*), which is interpreted as inter-area  
600 connectivity, have successfully provided object category information (Majima et al., 2014; Karimi-  
601 Rouzbahani et al., 2017a), previous studies suggested that neural communication is realized through  
602 amplitude- and phase-locking/coupling (Bruns et al., 2000; Siegel et al., 2012; Engel et al., 2013). More  
603 recently, researchers have quantitatively shown that amplitude- and phase-locking detect distinct  
604 signatures of neural communication across time and space from neural activity (Siems and Siegel, 2020;  
605 Mostame and Sadaghiani, 2020). Therefore, in line with recent studies, which successfully decoded  
606 object categories using inter-area correlated variability as neural codes (Tafreshi et al., 2019), we  
607 extracted amplitude- and phase-locking as two major connectivity features which might contain object  
608 category information as well. Briefly, amplitude-locking refers to the coupling between the envelopes of  
609 two signals (electrodes) and reflects the correlation of activation amplitude. To estimate the amplitude  
610 locking between two signals, we extracted the envelopes of the two signals using Hilbert transform  
611 (Gabor, 1946; explained below), then estimated the Pearson correlation between the two resulting  
612 envelopes as amplitude locking.

613

614 Phase locking, on the other hand, refers to the coupling between the phases of two signals and  
615 measures the synchronization of rhythmic oscillation cycles. To measure phase locking we used one of  
616 the simplest implementations, the phase locking value (PLV), which includes minimal mathematical  
617 assumptions (Bastos and Schoffellen, 2016) calculated as below:

$$618 \quad PLV = \frac{1}{N} \left| \sum_{i=1}^N e^{i\Delta\phi_i} \right| \quad (22)$$

619 where  $N$  is the number of trials and  $\Delta\phi$  is the phase difference between the signals to electrode pairs.  
620 As we used multivariate decoding without any trial-averaging,  $N$  was equal to 1 here. The calculation of  
621 amplitude and phase locking was performed on all electrode pairs leading to 465 and 8128 unique  
622 numbers for the 31- (Datasets 1 and 2) and 128-electrode (Dataset 3) datasets before dimension  
623 reduction was performed.

624

#### 625 *Original magnitude data (Orig Mag)*

626 We also used the post-stimulus original magnitude data (i.e. 1000 or 50 samples for the whole-trial and  
627 sliding time windows, respectively) to decode object category information without any feature  
628 extraction. This provided a reference to compare the information content of the Mean and variability  
629 features to see if the former provided any extra information.

630

## 631 **Multivariate decoding**

632 We used multivariate decoding to extract information about object categories from our EEG datasets.  
633 Basically, multivariate decoding, which has been dominating neuroimaging studies recently (Haynes et  
634 al., 2015; Grootswagers et al., 2017; Hebart and Baker, 2018), measures the cross-condition  
635 dissimilarity/contrast to quantify information content in neural representations. We used linear  
636 discriminant analysis (LDA) classifiers in multivariate analysis to measure the information content across  
637 all possible pairs of object categories within each dataset. Specifically, we trained and tested the  
638 classifiers on e.g. animal vs. car, animal vs. face, animal vs. plane, car vs. plane, face vs. car and plane vs.  
639 face categories, then averaged the 6 decoding results and reported them for each participant. The LDA  
640 classifier has been shown to be robust when decoding object categories from M/EEG (Grootswagers et  
641 al., 2017; Grootswagers et al., 2019), has provided higher decoding accuracies than Euclidean distance  
642 and Correlation based decoding methods (Carlson et al., 2013) and was around 30 times faster to train  
643 in our initial analyses compared to the more complex classifier of Support-Vector Machine (SVM). We  
644 ran our initial analysis and found similar results for the LDA and SVM, and used LDA to save the time. We  
645 used a 10-fold cross-validation procedure in which we trained the classifier on 90% of the data and  
646 tested it on the left-out 10% of the data, repeating the procedure 10 times until all trials from the pair of  
647 categories participate once in the training and once in the testing of the classifiers. We repeated the  
648 decoding across all possible pairs of categories within each dataset, which were 6, 6 and 15 pairs for  
649 Datasets 1, 2 and 3, which consisted of 4, 4 and 6 object categories, respectively. Finally, we averaged  
650 the results across all combinations and reported them as the average decoding for each participant.

651

652 In the whole-trial analyses, we extracted the above-mentioned features from the 1000 data samples  
653 after the stimulus onset (i.e. from 1 to 1000 ms). In the time-resolved analyses, on the other hand, we  
654 extracted the features from 50 ms sliding time windows in steps of 5 ms across the time course of the  
655 trial (-200 to 1000 ms relative to the stimulus onset time). Therefore, in time-resolved analyses, the  
656 decoding rates at each time point reflect the results for the 50 ms window around the time point, from -  
657 25 to +24 ms relative to the time point. Time-resolved analyses allowed us to evaluate the evolution of  
658 object category information across time as captured by different features.

659

## 660 **Dimensionality reduction**

661 The multi-valued features (e.g. inter-electrode correlation, wavelet, Hilbert amplitude and phase,  
662 Amplitude and Phase locking and Original magnitude data) resulted in more than a single feature value  
663 per trial per sliding time window. This could provide higher decoding values compared to the decoding  
664 values obtained from single-valued features merely because of including a higher number of features.  
665 Moreover, when the features outnumber the observations (i.e. trials here), the classification algorithm  
666 can over-fit to the data (Duda et al., 2012). Therefore, to obtain comparable decoding accuracies across  
667 single-valued and multi-valued features and to avoid potential over-fitting of classifier to the data we  
668 used principle component analysis (PCA) to reduce the dimension of the data in multi-valued features.  
669 Accordingly, we reduced the number of the values in the multi-valued features to **one** per time window  
670 per trial, which equaled the number of values for the single-valued features. To avoid potential leakage  
671 of information from testing to training (Pulini et al., 2019), we applied the PCA algorithm on the training  
672 data (folds) only and used the training PCA parameters (i.e. eigen vectors and means) for both training

673 and testing sets for dimension reduction in each cross-validation run separately. We only applied the  
674 dimension-reduction procedure on the multi-valued features. Note that, we did not reduce the  
675 dimension of the neural space (columns in the dimension-reduced data matrix) to below the number of  
676 electrodes “*e*” (opposite to Hatamimajoumerd et al., 2019) as we were interested in qualitatively  
677 comparing our results with the vast literature currently using multivariate decoding with all sensors  
678 (Grootswagers et al., 2017; Karimi-Rouzbahani et al., 2018; Hebart and Baker 2017). Also, we did not aim  
679 at finding more than one feature per trial, per time window, as we wanted to compare the results of  
680 multi-valued features with those of single-valued features, which only had a single value per trial, per  
681 time window.

682  
683 One critical point here is that, we applied the PCA on ***the concatenated data from all electrodes and***  
684 ***values obtained from each individual feature*** (e.g. wavelet coefficients in Wavelet), within each analysis  
685 window (e.g. 50 ms in time-resolved decoding). Therefore, for the multi-valued features, the “*e*”  
686 selected dimensions were the most informative ***spatial*** and ***temporal*** patterns detected across both  
687 ***electrodes*** and ***time samples***. Therefore, it could be the case that, within a given time window, two of  
688 the selected dimensions were from the same electrode (i.e. because two elements from the same  
689 electrode were more informative than the other electrode), which would lead to some electrodes not  
690 having any representatives among the selected dimensions. This is in contrast to the single-valued  
691 features (e.g. Mean) from which we only obtained one value per analysis window per electrode, limiting  
692 the features to only the ***spatial*** patterns within the analysis window, rather than both spatial and  
693 temporal patterns.

694

## 695 **Statistical analyses**

### 696 **Bayes factor analysis**

697 As in our previous studies (Grootswagers et al., 2019; Robinson et al., 2019), to determine the evidence  
698 for the null and the alternative hypotheses, we used Bayes analyses as implemented by Bart Krekelberg  
699 based on Rouder et al. (2012). We used standard rules of thumb for interpreting levels of evidence (Lee  
700 and Wagenmakers, 2014; Dienes, 2014): Bayes factors of  $>10$  and  $<1/10$  were interpreted as strong  
701 evidence for the alternative and null hypotheses, respectively, and  $>3$  and  $<1/3$  were interpreted as  
702 moderate evidence for the alternative and null hypotheses, respectively. We considered the Bayes  
703 factors which fell between 3 and  $1/3$  as suggesting insufficient evidence either way.

704

705 In the whole-trial decoding analyses, we asked whether there was a difference between the decoding  
706 values obtained from all possible pairs of features and also across frequency bands within every feature.  
707 Accordingly, we performed the Bayes factor analysis and calculated the Bayes factors as the probability  
708 of the data under alternative (i.e. difference) relative to the null (i.e. no difference) hypothesis between  
709 all possible pairs of features and also across frequency bands within every feature and dataset  
710 separately. The same procedure was used to evaluate evidence for difference (i.e. alternative  
711 hypothesis) or no difference (i.e. null hypothesis) in the maximum and average decoding accuracies, the  
712 time of maximum and above-chance decoding accuracies across features for each dataset separately.

713

714 We also evaluated evidence for the alternative of above-chance decoding accuracy vs. the null  
715 hypothesis of no difference from chance. For that purpose, we performed Bayes factor analysis between  
716 the distribution of actual accuracies obtained and a set of 1000 accuracies obtained from random  
717 permutation of class labels across the same pair of conditions (null distribution) on every time point (or  
718 only once for the whole-trial analysis), for each feature and dataset separately. No correction for  
719 multiple comparisons was performed when using Bayes factors as they are much more conservative  
720 than frequentist analysis in providing false claims with confidence (Gelman and Tuerlinckx, 2000;  
721 Gelman et al., 2012). The reason for the less susceptibility of Bayesian analysis compared to classical  
722 statistics, is the use of priors, which if chosen properly (here using the data-driven approach developed  
723 by Rouder et al. (2012)), significantly reduce the chance of making type I (false positive) errors.

724

725 The priors for all Bayes factor analyses were determined based on Jeffrey-Zellner-Siow priors (Jeffreys,  
726 1961; Zellner and Siow, 1980) which are from the Cauchy distribution based on the effect size that is  
727 initially calculated in the algorithm (Rouder et al., 2012). The priors are data-driven and have been  
728 shown to be invariant with respect to linear transformations of measurement units (Rouder et al., 2012),  
729 which reduces the chance of being biased towards the null or alternative hypotheses.

730

### 731 **Random permutation testing**

732 To evaluate the significance of correlations between decoding accuracies and behavioral reaction times,  
733 we calculated the percentage of the actual correlations that were higher (when positive) or lower (when  
734 negative) than a set of 1000 randomly generated correlations. These random correlations were  
735 generated by randomizing the order of participants' data in the behavioral reaction time vector (null  
736 distribution) for every time point and feature separately. The true correlation was considered significant  
737 if it surpassed 95% of the randomly generated correlations in the null distribution in either positive or  
738 negative directions ( $p < 0.05$ ) and the p-values were corrected for multiple comparisons across time  
739 using Matlab mafdr function which works based on fix rejection region (Storey, 2002).

740

## 741 **Results**

742 To check the information content of different features of the EEG activity about object categories, we  
743 performed multivariate pattern decoding on both the whole-trial as well as time-resolved data. The  
744 whole-trial analysis was aimed at providing results comparable to previous studies most of which  
745 performed whole-trial analysis. The time-resolved analysis, however, was the main focus of the present  
746 study and allowed us to check the information and temporal dynamics of variability-based neural codes  
747 as captured by different features. In figures 2 and 3, we only present a summary of the results with  
748 emphasis on the comparison between the time-specific ERP components, the most informative features  
749 detecting neural variability (i.e. Wavelet and Orig Mag), and the conventional Mean feature, which  
750 ignores potential information in neural variabilities. The complete comparison between the 32 features  
751 are provided in Supplementary materials, but briefly explained in the manuscript.

752

753 [Can the features sensitive to temporal variabilities, provide additional category](#)  
754 [information to the conventional “mean” feature?](#)

755

756 To answer the first question, we compared decoding accuracies in the whole-trial time span (0 to 1000  
757 ms relative to stimulus onset) across all features and for each dataset separately (see the complete  
758 results in Supplementary Figures 1 and 2 and summary results in Figure 2, black bars). There was not  
759 enough ( $BF > 3$ ) evidence for above-chance decoding for majority of features (e.g. moment features,  
760 complexity and frequency-domain features, Supplementary Figure 1; black bars and their Bayesian  
761 analyses). However, consistently across the three datasets, there was moderate ( $3 < BF < 10$ ) or strong  
762 ( $BF > 10$ ) evidence for above-chance decoding for all ERP components (N1, P1, P2a and P2b), Wavelet  
763 coefficients (Wavelet) and Original magnitude data (Orig Mag), which were either targeted at specific  
764 time windows within the trial (i.e. ERPs) or could detect temporal variabilities within the trial (i.e.  
765 Wavelet and Orig Mag; Figure 2A; black bars).

766

767 Importantly, in all three datasets, there was moderate ( $3 < BF < 10$ ) or strong ( $BF > 10$ ) evidence that ERP  
768 components of N1 and P2a provided *higher* decoding values than the Mean (Figure 2B; black boxes in  
769 Bayes matrices). There was also strong evidence ( $BF > 10$ ), that the Wavelet and Orig Mag features  
770 outperformed the Mean feature in datasets 2 and 3 (Figure 2B; blue boxes in Bayes matrices). This  
771 shows that simply using the earlier ERP components of N1 and P2a can provide more information than  
772 using the Mean activity across the whole trial. This was predictable, as the Mean across the whole trial  
773 simply ignores within-trial temporally specific information. Interestingly, even ERPs were outperformed  
774 by Wavelet and Orig Mag features in Dataset 3 (but not the opposite across the 3 datasets; Figure 2B;  
775 violet boxes in Bayes matrices). This suggests that, even further targeting the most informative elements  
776 (i.e. Wavelet), and/or data samples (i.e. Orig Mag) within the trial can lead to improved decoding. Note  
777 that, the Wavelet and Orig Mag features provided the most informative temporal patterns/samples  
778 upon the dimension reduction procedure applied on their extracted features (see *Methods*).

779

780 Following previous observations about the advantage of Delta (Watrous et al., 2015; Behroozi et al.,  
781 2016) and Theta (Wang et al., 2018) frequency bands, we compared the information content in the  
782 Delta (0.5-4 Hz), Theta (4-8 Hz), Alpha (8-12 Hz), Beta (12-16 Hz), Gamma (16-200Hz) and Broad  
783 frequency bands. We predicted the domination of Theta frequency band, following suggestions about  
784 the domination of Theta frequency band in feed-forward visual processing (Bastos et al., 2015). For our  
785 top-performing ERP, Wavelet and Orig Mag features, we saw consistent domination of Theta followed  
786 by the Alpha frequency band (Figure 2A). Interestingly, for the ERP components, the decoding in Theta  
787 band even outperformed the Broad band ( $BF > 3$  for P2b), which contained the whole frequency  
788 spectrum. Note that, as opposed to previous suggestions (Karakas et al., 2000), the domination of the  
789 Theta frequency band in ERP components could not be trivially predicted by their timing relative to the  
790 stimulus onset. If this was the case here, the P2b component (200 to 275 ms) should have elicited its  
791 maximum information in the Delta (0.5 to 4Hz) and Theta (4-8 Hz), rather than the Theta and Alpha (8-  
792 12 Hz) frequency bands. For the Mean feature, on the other hand, the Delta band provided the highest

793 information level, comparable to the level of the Broad-band activity. This confirms that Broad-band  
794 whole-trial Mean activity, reflects the general trend of the signal (low-frequency component).

795

796 Together, we observed that the features which are targeted at informative windows of the trial (ERP  
797 components), and those sensitive to informative temporal variabilities (Wavelet and Orig Mag) could  
798 provide additional category information to the conventionally used Mean of activity. We observed that  
799 Theta frequency band, which has been suggested to support feed-forward information flow, is also  
800 dominant in our datasets, which are potentially dominated by feed-forward processing of visual  
801 information during object perception. Next, we will compare the temporal dynamics of information  
802 encoding across our features.

803

804

805

806

807

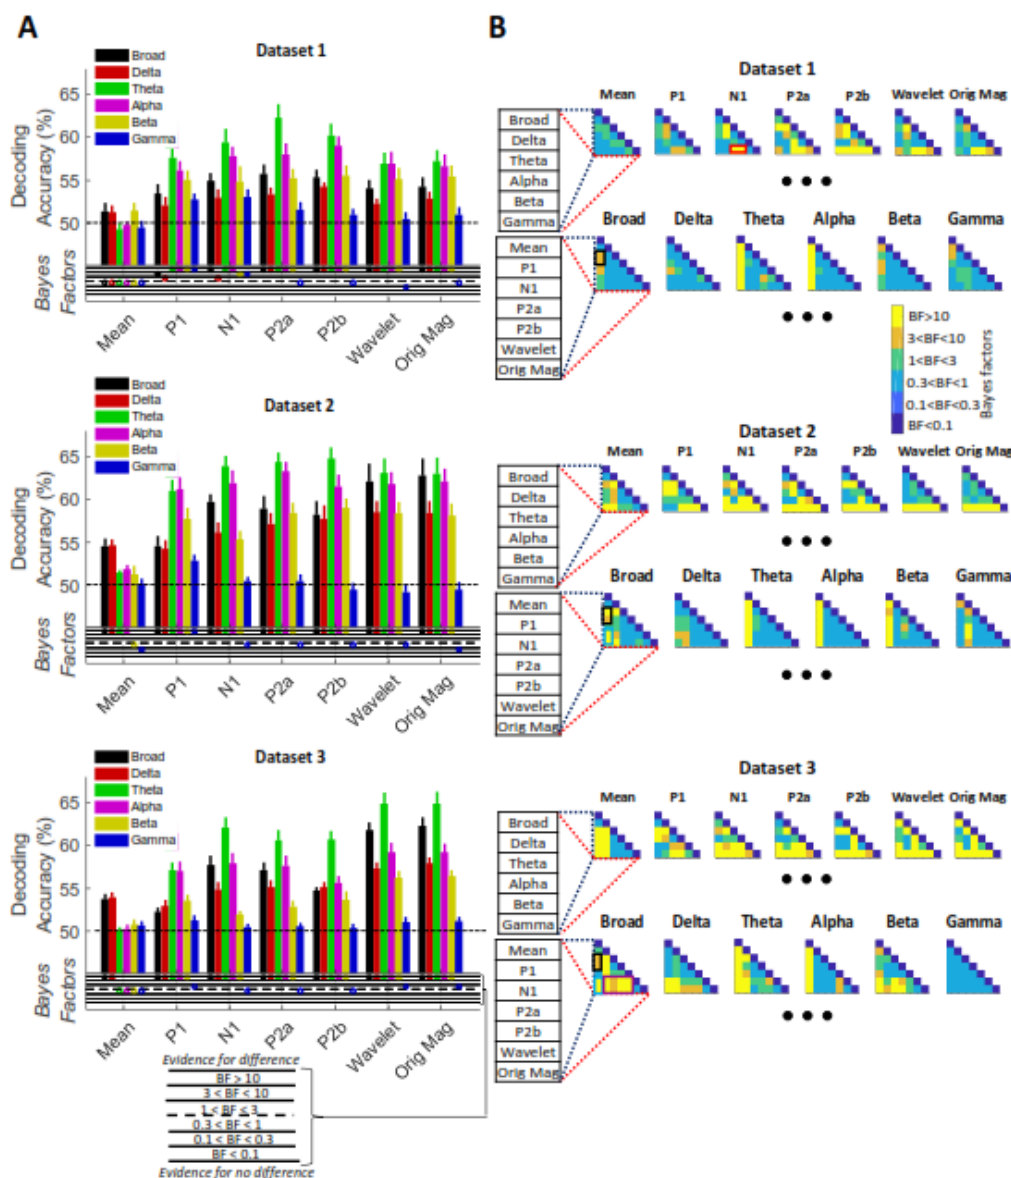

**Figure 2.** Whole-trial decoding of object categories in the three datasets across the Broad-band and different frequency bands (A) with their Bayesian analyses (B). The results are only presented for features of Mean, ERP components, Wavelet and Orig Mag. For full results including other features see Supplementary Figures 1 and 2. (A) The black horizontal dashed lines on the top panels refer to chance-level decoding. Thick bars show the average decoding across participants (error bars Standard Error across participants). Bayes Factors are shown in the bottom panel of each graph: Filled circles show moderate/strong evidence for either hypothesis and empty circles indicate insufficient evidence. They show the results of Bayes factor analysis when evaluating the difference from chance-level decoding. (B) Top panel Bayes matrices compare the decoding results within each frequency band, across features separated by datasets. Bottom panel Bayes matrices compare decoding results across different frequency bands and dataset separately. Colors indicate different levels of evidence for existing difference (moderate  $3 < BF < 10$ , Orange; strong  $BF > 10$ , Yellow), no difference (moderate  $0.1 < BF < 0.3$ , light blue; strong  $BF < 0.1$ , dark blue) or insufficient evidence ( $1 < BF < 3$  green;  $0.3 < BF < 1$  Cyan) for either hypotheses. For example, for Dataset 1, there is strong evidence for higher decoding values for the N1 feature in the Theta and Alpha band than in Gamma band as indicated by the red box.



809

810 Do the features sensitive to temporal variabilities evolve over similar time windows to the  
811 “mean” feature?

812

813 One main insight that EEG decoding can provide is to reveal the temporal dynamics of cognitive  
814 processes. However, the Mean activity, which has dominated the literature (Grootswagers et al., 2017),  
815 might hide or distort the true temporal dynamics as it ignores potentially informative temporal  
816 variabilities (codes) within the analysis window. Therefore, we systematically compared the information  
817 content of a large set of features which are sensitive to temporal variabilities using time-resolved  
818 decoding (50 ms sliding time windows in steps of 5 ms; see the rationale for choosing the 50 ms  
819 windows in Supplementary Figure 3A). By definition, we do not have the time-resolved decoding results  
820 for the ERP components here.

821

822 Before presenting the time-resolved decoding results, to validate the results and suggestions made  
823 about our whole-trial decoding (Figure 2), we performed two complementary analyses. First, we  
824 checked to see if the advantage of the Theta- to Broad-band decoding in the whole-trial analysis (Figure  
825 2), could generalize to time-resolved decoding: we observed the same effect in the (variability-sensitive)  
826 Wavelet feature (in many time points especially for Dataset 2;  $BF > 3$ ), but not in the (variability-  
827 insensitive) Mean feature (Supplementary Figure 3B). This could possibly be explained by the smoothing  
828 (low-pass filtering) effect of the Mean feature making both Theta- and Broad-band data look like low-  
829 frequency data. Next, we utilized the spatiotemporal specificity of classifier weights and time-resolved  
830 decoding to see if Theta-band information would show a feed-forward trend on the scalp to support our  
831 earlier suggestion. Visual inspection suggests information spread from posterior to anterior parts of the  
832 scalp (Supplementary Figure 4), supporting the role of Theta-band activity in feed-forward processing.  
833 Despite these observations, we used Broad-band signals in the following analyses to be able to compare  
834 our results with previous studies, which generally used the Broad-band activity.

835

836 Time-resolved decoding analyses showed that for all features, including the complexity features, which  
837 were suggested to need large sample sizes (Procaccia, 2000), there was moderate ( $3 < BF < 10$ ) or strong  
838 ( $BF > 10$ ) evidence for above-chance decoding at some time points consistently across the three datasets  
839 (Supplementary Figures 5A). However, all features showed distinct temporal dynamics to each other and  
840 across datasets. The between-dataset dissimilarities, could be driven by many dataset-specific factors,  
841 including duration of image presentation (Carlson et al., 2013). However, there were also similarities  
842 between the temporal dynamics of different features. For example, the time points of first strong  
843 ( $BF > 10$ ) evidence for above-chance decoding ranged from 75 ms to 195 ms (Supplementary Figure 5A  
844 and E) and the decoding values reached their maxima in the range between 150 ms to 220 ms  
845 (Supplementary Figures 5A and D) across features. This is consistent with many decoding studies  
846 showing the temporal dynamics of visual processing in the brain (Isik et al., 2013; Cichy et al., 2014;  
847 Karimi-Rouzbahani et al., 2021b). There was no feature which consistently preceded or followed other  
848 features, to suggest the existence of very early or late neural codes (Supplementary Figures 5D and E).  
849 There was more information decoded from features of Mean, Median, Variance, and several multi-

850 valued features, especially Wavelet and Orig Mag, compared to other features across the three datasets  
851 (Supplementary Figures 5A). The mentioned features dominated other features in terms of both average  
852 and maximum decoding accuracies (Supplementary Figures 5B and C). A complementary analysis  
853 suggested that there is a potential overlap between the neural codes that different features detected  
854 (Supplementary Figure 6).

855

856 We then directly compared of the Mean and the most informative variability-sensitive features (Wavelet  
857 and Orig Mag). Consistently across the datasets, there was moderate ( $3 < BF < 10$ ) or strong ( $BF > 10$ )  
858 evidence for higher decoding obtained by Wavelet and Orig Mag compared to the Mean feature on time  
859 points before 200 ms post-stimulus onset (Figure 3A). After 200 ms, this advantage sustained (Dataset  
860 3), disappeared (Dataset 1) or turned into disadvantage (Dataset 2). Except for few very short  
861 continuous intervals, during which Wavelet provided higher decoding values compared to Orig Mag, the  
862 two features provided almost the same results (Figure 3; yellow dots on bottom panels). Comparing the  
863 parameters of the decoding curves, we found moderate ( $3 < BF < 10$ ) or strong ( $BF > 10$ ) evidence for higher  
864 maximum decoding for the Wavelet and Orig Mag features than the Mean feature in Datasets 1 and 3  
865 (Figure 3B). There was also moderate ( $3 < BF < 10$ ) evidence for higher maximum decoding accuracy for  
866 Wavelet vs. Orig Mag (Figure 3B). There was also strong ( $BF > 10$ ) evidence for higher average decoding  
867 accuracy for the Wavelet and Orig Mag features over the Mean feature in Dataset 3 (Figure 3C). There  
868 was also moderate ( $3 < BF < 10$ ) evidence for higher maximum decoding for Wavelet vs. Orig Mag in  
869 Datasets 2 and 3. These results show that the Wavelet feature provides the highest maximum (in  
870 Dataset 3) and average (in Datasets 2 and 3) decoding accuracies among the three features followed by  
871 the Orig Mag feature. The measures of maximum and average decoding accuracies were calculated in  
872 the post-stimulus onset (0-1000 ms) for each participant separately. We also compared the timing  
873 parameters of the decoding curves (i.e. the time to the first above-chance and maximum decoding  
874 relative to stimulus onset) obtained for the three features (Figure 3D and E), but found insufficient  
875 evidence ( $0.3 < BF < 3$ ) for their difference.

876

877 Together, these results suggest that the inclusion of temporal variabilities of activity can provide  
878 additional information about object categories, to what is conventionally obtained from the Mean of  
879 activity. Note that, the advantage of Wavelet and Orig Mag features cannot be explained by the  
880 size/dimensionality of the feature space, as the number of dimensions were equalized across features.  
881 Importantly, however, the decoding of information from temporal variabilities did not lead to different  
882 temporal dynamics of information decoding. This can be explained by either the common cognitive  
883 processes producing the decoded neural codes (i.e. object categorization), the overlap between the  
884 information (neural codes) detected by our features or a combination of both.

885

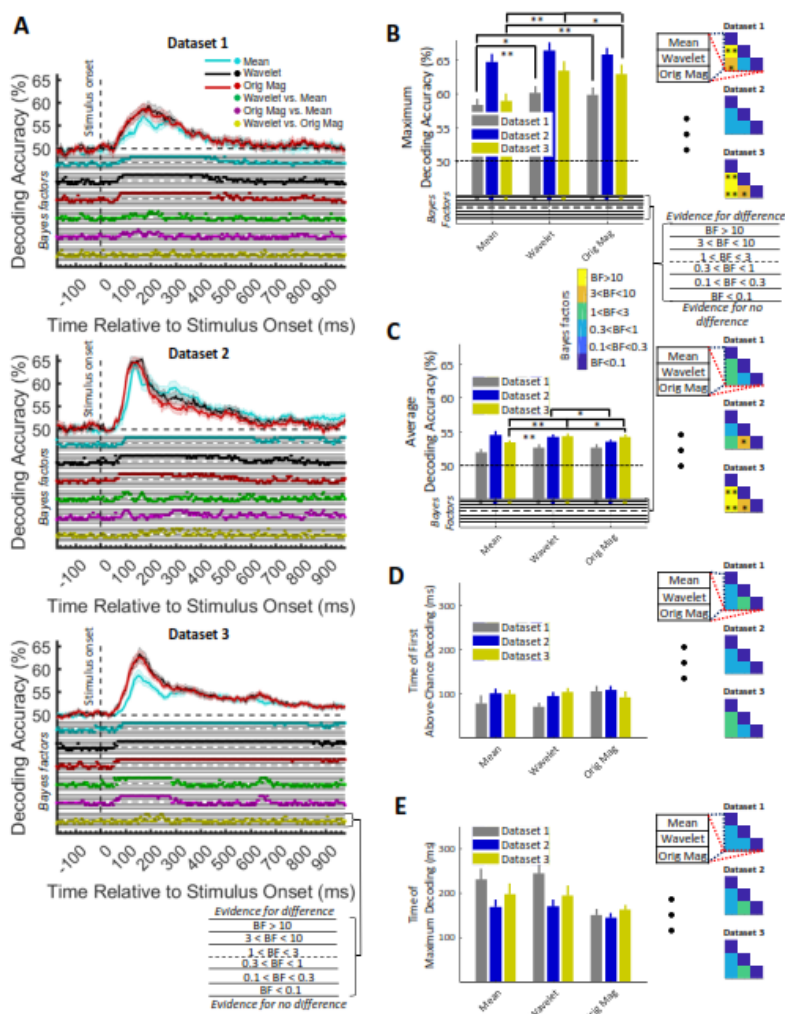

**Figure 3.** Time-resolved decoding of object categories from the three datasets for 3 of the target features (A) and their extracted timing and amplitude parameters (B-E). (A) Top section in each panel shows the decoding accuracies across time and the bottom section shows the Bayes factor evidence for the difference of the decoding accuracy compared to chance-level decoding. The solid lines show the average decoding across participants and the shaded area the Standard Error across participants. The horizontal dashed lines on the top panel refer to chance-level decoding. Filled circles in the Bayes Factors show moderate/strong evidence for either difference or no difference from chance-level or across features and empty circles indicate insufficient evidence for either hypotheses. (B) Timing and amplitude parameters extracted from the time-resolved accuracies in (A). (B-E) Left: the maximum and average decoding accuracies, the time of maximum and the first above-chance decoding. The horizontal dashed lines refer to chance-level decoding. Thick bars show the average across participants (error bars Standard Error across participants). Bottom section on (B) and (C) show the Bayes factor evidence for the difference of the decoding accuracy compared to chance-level decoding. (B-E) Right: matrices compare the parameters obtained from different features. Different levels of evidence for existing difference (moderate  $3 < BF < 10$ , Orange; strong  $BF > 10$ , Yellow), no difference (moderate  $0.1 < BF < 0.3$ , light blue; strong  $BF < 0.1$ , dark blue) or insufficient evidence ( $1 < BF < 3$  green;  $0.3 < BF < 1$  Cyan) for either hypotheses. Filled circles in the Bayes Factors show moderate/strong evidence for either hypothesis and empty circles indicate insufficient evidence. Single and double stars indicate moderate and strong evidence for difference between the parameters obtained from decoding curves of the three features.

887

888 Do the features sensitive to temporal variabilities explain the behavioral recognition  
889 performance more accurately than the “mean” feature?

890

891 Although we observed an advantage for the features which were sensitive to temporal variability (e.g.  
892 Wavelet) over other, more summarized, features (e.g. Mean), this can all be a by-product of more  
893 flexibility (e.g. inclusion of both **temporal** and **spatial** codes) in the former over the latter, and not read  
894 out by down-stream neurons that support behavior. To validate the behavioral relevance of the  
895 detected neural codes, we calculated the *correlation* between the decoding accuracies of features and  
896 the reaction times of participants (Vidaurre et al., 2019; Ritchie et al., 2015). Participants’ reaction times  
897 in object recognition have been previously shown to be predictable from decoding accuracy (Ritchie et  
898 al., 2015). We expected to observe negative correlations between the features’ decoding accuracies and  
899 participants’ reaction times in the post-stimulus span (Ritchie et al., 2015). This suggests that greater  
900 separability between neural representations of categories might lead to with categorizing them faster in  
901 behavior; supporting that the decoded neural codes might be used by neurons which drive behavior. We  
902 only used Dataset 2 in this analysis, as it was the only dataset with an active object detection task;  
903 therefore relevant reaction times were available. The (Spearman’s rank-order) correlations were  
904 calculated across the time course of the trials between the 10-dimensional vector of neural decoding  
905 accuracies obtained on every time point and the 10-dimensional vector of behavioral reaction times,  
906 both obtained from the group of 10 participants (Cichy et al., 2014). This resulted in a single correlation  
907 value for each time point for the whole group of participants.

908

909 All features, except Katz FD, showed negative trends after the stimulus onset (Figure 4A). The  
910 correlations showed more sustained negative values for the multi-valued vs. single-valued features  
911 ( $p < 0.05$ ). There was also larger negative peaks (generally  $< -0.5$ ) for multi-valued features especially  
912 Wavelet, compared to other features (generally  $> -0.5$ ). Specifically, while higher-order moment features  
913 (i.e. Variance, Skewness and Kurtosis) as well as many complexity features showed earlier negative  
914 peaks at around 150 ms, Mean, Median, frequency-domain features and multi-valued features showed  
915 later negative peaks after 300 ms. Therefore, the multi-valued features, especially Wavelet, which were  
916 sensitive to temporal variabilities of the signals, showed the most sustained and significant correlations  
917 to behavior.

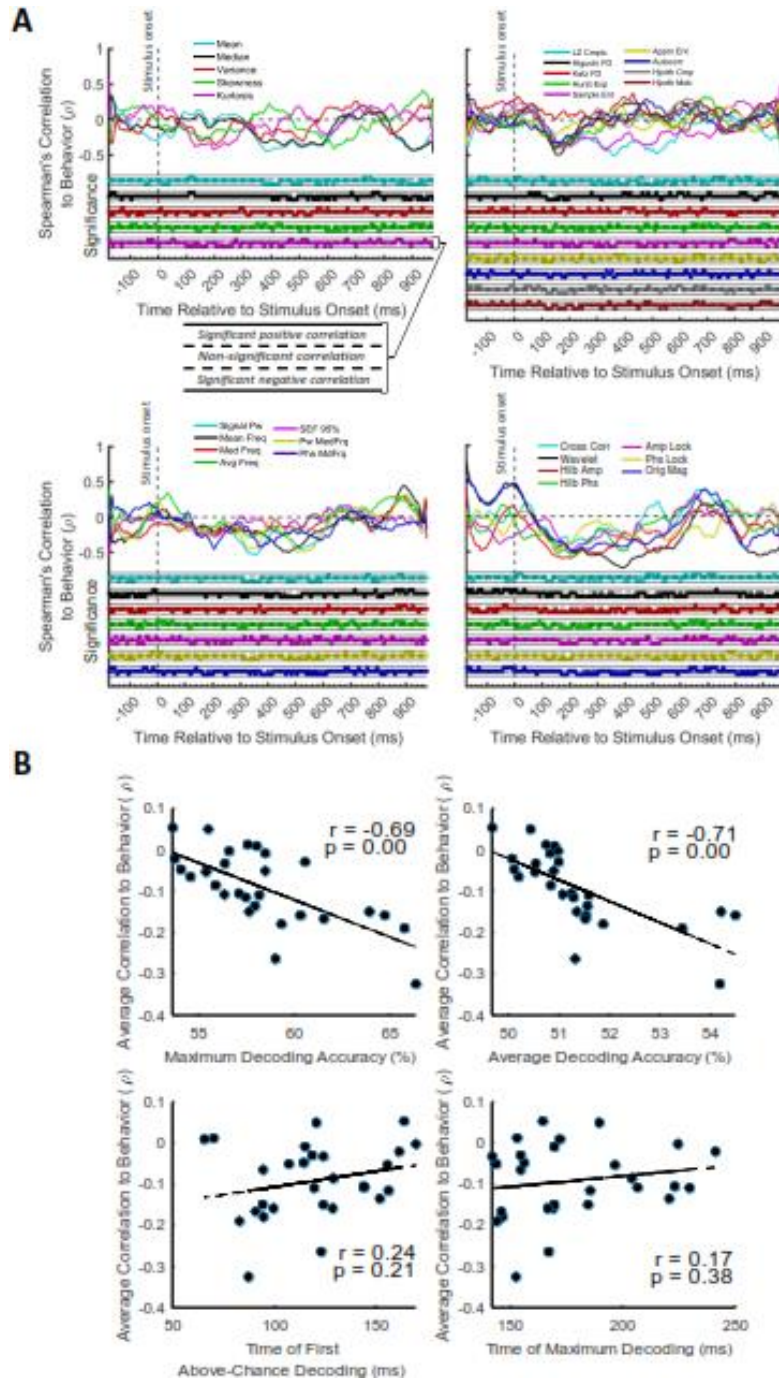

**Figure 4.** Correlation between the decoding accuracies and behavioral reaction times for Dataset 2 (other datasets did not have an active object recognition/detection task). (A) Top section in each panel shows the (Spearman's) correlation coefficient obtained from correlating the decoding values and the reaction times for each feature separately. Correlation curves were obtained from the data of all participants. Bottom section shows positively or negatively significant ( $P < 0.05$ ; filled circles) or non-significant ( $p > 0.05$ ; empty circles) correlations as evaluated by random permutation of the variables in correlation. (B) Correlation between each of the amplitude and timing parameters of time-resolved decoding (i.e. maximum and average decoding accuracy and time of first and maximum decoding) with the average time-resolved correlations calculated from (A) for the set of  $N = 28$  features. The slant line shows the best linear fit to the distribution of the data.

919

920 Visual inspection suggests that features which provided a higher decoding accuracy (e.g. Wavelet, Figure  
921 3), did also better at predicting behavioral performance (e.g. Wavelet, Figure 4). To quantitatively see if  
922 such a relationship exists, we calculated the correlation between parameters of the decoding curves  
923 (introduced in Figure 3B-D) and the “average correlation to behavior” achieved by the same features  
924 (Figure 4A). Specifically, we used the “average” and “maximum” decoding accuracies, which we  
925 hypothesized to predict “average correlation to behavior”, and the “time of first above-chance” and  
926 “maximum” decoding accuracies (used as control variables here), which we hypothesized not to predict  
927 “average correlation to behavior”. To obtain the parameter of “average correlation to behavior”, we  
928 simply averaged the correlation to behavior in the post-stimulus time span for each feature separately  
929 (Figure 4A). Results showed that (Figure 4B), while the temporal parameters of “time of first above-  
930 chance” and “maximum” decoding (our control parameters) failed to predict the level of average  
931 correlation to behavior ( $r=0.24$ ,  $p=0.21$ , and  $r=0.17$ ,  $p=0.38$ , respectively), the parameters of “maximum”  
932 and “average” decoding accuracies significantly ( $r=-0.69$  and  $r=-0.71$  respectively, with  $p<0.0001$ ;  
933 Pearson’s correlation) predicted the average correlation to behavior. Note the difference between the  
934 “Spearman’s correlation to behavior” calculated in Figure 4A and the correlations reported in Figure 4B.  
935 While the former is obtained by correlating the time-resolved decoding rates and corresponding  
936 reaction times across participants, the latter is calculated by correlating the post-stimulus average of the  
937 former correlations and their corresponding decoding parameters across features, rather than  
938 participants. This result suggests that the more effective the decoding of the neural codes, the better  
939 the prediction of behavior. Note that, this is not a trivial result; higher decoding values for the more  
940 informative features do not necessarily lead to higher correlation to behavior, as “correlation”  
941 normalizes the absolute values of input variables.

942

## 943 Discussion

944

945 Temporal variability of neural activity has been suggested to provide an additional channel to the  
946 “mean” of activity for the encoding of several aspects of the input sensory information. This includes  
947 complexity (Garrett et al., 2020), uncertainty (Orbán et al., 2016) and variance (Hermundstad et al.,  
948 2014) of the input information. It is suggested that the brain optimizes the neuronal activation and  
949 variability to avoid over-activation (energy loss) for simple, familiar and less informative categories of  
950 sensory inputs. For example, face images, which have less variable compositional features, evoked less  
951 variable responses in fMRI, compared to house images, which were more varied, even in a passive  
952 viewing task (Garrett et al., 2020). This automatic and adaptive modulation of neural variability can  
953 result in more effective and accurate encoding of the sensory inputs in changing environments e.g. by  
954 suppressing uninformative neuronal activation for less varied (more familiar) stimuli such as face vs.  
955 house images (Garrett et al., 2020). Despite the recent evidence about the richness of information in  
956 temporal variability, which is modulated by the category of the sensory input (Garrett et al., 2020;  
957 Orbán et al., 2016; Waschke et al., 2021), majority of EEG studies still ignore variability in decoding.  
958 Specifically, they generally either extract variability (e.g. entropy and power) from the whole-trial  
959 activity (e.g. for brain-computer interface (BCI)) or use the simple “mean” (average) magnitude data

960 within sub-windows of the trial (e.g. for time-resolved decoding; Grootswagers et al., 2017). The former  
961 can miss the informative within-trial variabilities/fluctuations of the trial in the highly dynamical and  
962 non-stationary evoked potentials. The latter, on the other hand, may overlook the informative  
963 variabilities within the sliding time windows as a result of temporal averaging.

964

965 Here, we quantified the advantage of the features sensitive to temporal variabilities over the  
966 conventional “mean” activity. In whole-trial analysis, we observed that, the features, which targeted  
967 informative sub-windows/samples of the trial (e.g. ERP components, Wavelet coefficients (Wavelet) and  
968 Original magnitude data (Orig Mag)), could provide more category information than the Mean feature,  
969 which ignored temporal variabilities. Interestingly, ERP components (N1, P2a and P2b) provided  
970 comparable results to that obtained by informative samples (Orig Mag) or Wavelet transformation  
971 (except for Dataset 3). That could be the reason for the remarkable decoding results achieved in  
972 previous studies which used ERPs (Wang et al., 2012; Qin et al., 2016) and Wavelet (Taghizadeh-Sarabi  
973 et al., 2015). These results also proposes that, we might not need to apply complex transformations (e.g.  
974 Wavelet) on the data in whole-trial analysis (Taghizadeh-Sarabi et al., 2015), as comparable results can  
975 be obtained using simple ERP components or original magnitude data. However, inclusion of more  
976 dimensions of the features in decoding or combining them (Karimi Rouzbahani et al., 2011; Qin et al.,  
977 2016) could potentially provide higher decoding accuracies for multi-valued (e.g. Wavelet; Taghizadeh-  
978 Sarabi et al., 2015) than ERP features (i.e. we equalized the dimensions across features here).

979

980 The Wavelet and Original magnitude data not only outperformed all the variability-sensitive features,  
981 but also the conventional Mean feature. Importantly, while features such as Hilbert phase and  
982 amplitude, Phase- and Amplitude-locking and Inter-electrode correlations, also had access to all the  
983 samples within the sliding analysis window, they failed to provide information comparable to Wavelet  
984 and Orig Mag features. The reason for the success of the Original magnitude data, seems to be that it  
985 basically makes no assumptions about the shape/pattern of the potential neural codes, as opposed to  
986 Hilbert phase (Hilb Phs), amplitude (Hilb Amp), and correlated variability (Cross Corr) each of which are  
987 sensitive to one specific aspect of neural variability (i.e. phase, amplitude, correlation). The reason for  
988 success of the Wavelet feature, on the other hand, seems to be its reasonable balance between  
989 flexibility in detecting potential neural codes contained in the amplitude, phase and frequency/scale and  
990 a relatively lower susceptibility to noise as a result of filtering applied on different frequency bands (Guo  
991 et al., 2009). Together, these observations support the idea that neural codes are complex structures  
992 reflected in multiple aspects of EEG data e.g. amplitude, phase and frequency/scale (Panzeri et al., 2010;  
993 Waschke et al., 2021).

994

995 The advantage of Theta- over Broad-band in our data (Supplementary Figures 1 and 3) is consistent with  
996 previous monkey studies suggesting that Theta and Gamma frequency bands played major roles in feed-  
997 forward processing of visual information in the brain (Bastos et al., 2015), which also seemed dominant  
998 here (Supplementary Figure 4). One potential reason for the encoding of feed-forward information in  
999 the Theta band can be that bottom-up sensory signals transfer information about ongoing experiences,  
1000 which might need to be stored in long-term memory for future use (Zheng and Colgin, 2015). Long-term

1001 memories are suggested to be encoded by enhanced long-lasting synaptic connections. The optimal  
1002 patterns of activity which can cause such changes in synaptic weights were suggested to be successive  
1003 Theta cycles which carry contents in fast Gamma rhythms (~100 Hz; Larson et al., 1986). While direct  
1004 correspondence between invasive vs. non-invasive neural data remains unclear (Ng et al., 2013), this  
1005 study provides additional evidence for the major role of Theta frequency band in human visual  
1006 perception (Wang et al., 2012; Qin et al., 2016; Jadidi et al., 2016; Taghizadeh-Sarabi et al., 2015; Torabi  
1007 et al., 2017). It also suggests that BCI community might benefit from concentrating on specific frequency  
1008 bands relevant to the cognitive or sensory processing undergoing in the brain; i.e. investigating the  
1009 Theta band when stimulating the visual system.

1010

1011 One critical question for cognitive neuroscience has been whether (if at all) neuroimaging data can  
1012 explain behavior (Williams et al., 2007; Ritchie et al., 2015; Woolgar et al., 2019; Karimi-Rouzbahani et  
1013 al., 2019; Karimi-Rouzbahani et al., 2021a). We extended this question by asking whether more optimal  
1014 decoding of object category information, can lead to better prediction of behavioral performance. We  
1015 showed in our Dataset 2 that, this can be the case. Critically, here we observed for the same dataset  
1016 that, there seems to be a linear relationship between the obtainable decoding accuracy and the  
1017 explanatory power of the features. It implies that in order to bring neuroimaging observations closer to  
1018 behavior, we might need to work on how we can read out the neural codes more effectively.

1019

1020 It has been suggested that neural variability is not only modulated by sensory information (as focused  
1021 on here), but also by other top-down cognitive processes such as attention, expectation, memory and  
1022 task demands (Waschke et al. 2021). For example, attention decreased low-frequency neural  
1023 variabilities/power (2-10 Hz; which is referred to as “desynchronization”) while increasing high-  
1024 frequency neural variabilities/power (Wyart and Tallon-Baudry, 2009). Therefore, in the future, it will be  
1025 interesting to know which features best detect the modulation of neural variability in other cognitive  
1026 tasks. Moreover, it is interesting to know how (if at all) a combination of the features used in this study  
1027 could provide any additional information about object categories and/or behavior. In other words,  
1028 although all of the individual features evaluated here covered some variance of category object  
1029 information, to detect the neural information more effectively, it might be helpful to combine multiple  
1030 features using supervised and un-supervised methods (Karimi Rouzbahani et al., 2011; Qin et al., 2016).

1031

1032 The cross-dataset, large-scale analysis methods implemented in this study aligns with the growing trend  
1033 towards meta-analysis in cognitive neuroscience. Recent studies have also adopted and compared  
1034 several datasets to facilitate forming more rigorous conclusions about how the brain performs different  
1035 cognitive processes such as sustained attention (Langner et al., 2013) or working memory (Adam et al.,  
1036 2020). Our results provide evidence supporting the idea that neural variability seems to be an additional  
1037 channel for information encoding in EEG, which should not be simply ignored.

1038



## 1039 Acknowledgements

1040 This research was funded by the Royal Society's Newton International Fellowship SUAI/059/G101116 to  
1041 Hamid Karimi-Rouzbahani.

1042

## 1043 References

1044 Abootalebi, V., Moradi, M.H. and Khalilzadeh, M.A., 2009. A new approach for EEG feature extraction in  
1045 P300-based lie detection. *Computer methods and programs in biomedicine*, 94(1), pp.48-57.

1046 Aboy, M., Hornero, R., Abásolo, D. and Álvarez, D., 2006. Interpretation of the Lempel-Ziv complexity  
1047 measure in the context of biomedical signal analysis. *IEEE transactions on biomedical engineering*,  
1048 53(11), pp.2282-2288.

1049 Adam, K.C., Vogel, E.K. and Awh, E., 2020. Multivariate analysis reveals a generalizable human  
1050 electrophysiological signature of working memory load. *bioRxiv*.

1051 Ahmadi-Pajouh, M.A., Ala, T.S., Zamanian, F., Namazi, H. and Jafari, S., 2018. Fractal-based  
1052 classification of human brain response to living and non-living visual stimuli. *Fractals*, 26(05), p.1850069.

1053 Alimardani, F., Cho, J.H., Boostani, R. and Hwang, H.J., 2018. Classification of bipolar disorder and  
1054 schizophrenia using steady-state visual evoked potential based features. *IEEE Access*, 6, pp.40379-  
1055 40388.

1056 Bastos, A.M. and Schoffelen, J.M., 2016. A tutorial review of functional connectivity analysis methods and  
1057 their interpretational pitfalls. *Frontiers in systems neuroscience*, 9, p.175.

1058 Bastos, A.M., Vezoli, J., Bosman, C.A., Schoffelen, J.M., Oostenveld, R., Dowdall, J.R., De Weerd, P.,  
1059 Kennedy, H. and Fries, P., 2015. Visual areas exert feedforward and feedback influences through distinct  
1060 frequency channels. *Neuron*, 85(2), pp.390-401.

1061 Behroozi, M., Daliri, M.R. and Shekarchi, B., 2016. EEG phase patterns reflect the representation of  
1062 semantic categories of objects. *Medical & biological engineering & computing*, 54(1), pp.205-221.

1063 Bizas, E., Simos, P.G., Stam, C.J., Arvanitis, S., Terzakis, D. and Micheloyannis, S., 1999. EEG  
1064 correlates of cerebral engagement in reading tasks. *Brain Topography*, 12(2), pp.99-105.

1065 Bruns, A., Eckhorn, R., Jokeit, H. and Ebner, A., 2000. Amplitude envelope correlation detects coupling  
1066 among incoherent brain signals. *Neuroreport*, 11(7), pp.1509-1514.

1067 Carlson, T., Tovar, D.A., Alink, A. and Kriegeskorte, N., 2013. Representational dynamics of object vision:  
1068 the first 1000 ms. *Journal of vision*, 13(10), pp.1-1.

1069 Chan, A.M., Halgren, E., Marinkovic, K. and Cash, S.S., 2011. Decoding word and category-specific  
1070 spatiotemporal representations from MEG and EEG. *Neuroimage*, 54(4), pp.3028-3039.

1071 Cichy, R.M., Pantazis, D. and Oliva, A., 2014. Resolving human object recognition in space and  
1072 time. *Nature neuroscience*, 17(3), p.455.

1073 Contini, E.W., Wardle, S.G. and Carlson, T.A., 2017. Decoding the time-course of object recognition in  
1074 the human brain: From visual features to categorical decisions. *Neuropsychologia*, 105, pp.165-176.

1075 Dienes, Z., 2014. Using Bayes to get the most out of non-significant results. *Frontiers in psychology*, 5,  
1076 p.781.

1077 Duda, R.O., Hart, P.E. and Stork, D.G., 2012. *Pattern classification*. John Wiley & Sons.

- 1078 Eckhorn, R., Bauer, R., Jordan, W., Brosch, M., Kruse, W., Munk, M. and Reitboeck, H.J., 1988. Coherent  
1079 oscillations: A mechanism of feature linking in the visual cortex?. *Biological cybernetics*, 60(2), pp.121-  
1080 130.
- 1081 Engel, A.K., Gerloff, C., Hilgetag, C.C. and Nolte, G., 2013. Intrinsic coupling modes: multiscale  
1082 interactions in ongoing brain activity. *Neuron*, 80(4), pp.867-886.
- 1083 Fulcher, B.D. and Jones, N.S., 2017. hctsa: A computational framework for automated time-series  
1084 phenotyping using massive feature extraction. *Cell systems*, 5(5), pp.527-531.
- 1085 Gabor, D., 1946. Theory of communication. Part 1: The analysis of information. *Journal of the Institution*  
1086 *of Electrical Engineers-Part III: Radio and Communication Engineering*, 93(26), pp.429-441.
- 1087 Garrett, D.D., Epp, S.M., Kleemeyer, M., Lindenberger, U. and Polk, T.A., 2020. Higher performers  
1088 upregulate brain signal variability in response to more feature-rich visual input. *NeuroImage*, 217,  
1089 p.116836.
- 1090 Gawne, T.J., Kjaer, T.W. and Richmond, B.J., 1996. Latency: another potential code for feature binding in  
1091 striate cortex. *Journal of neurophysiology*, 76(2), pp.1356-1360.
- 1092 Gelman, A. and Tuerlinckx, F., 2000. Type S error rates for classical and Bayesian single and multiple  
1093 comparison procedures. *Computational Statistics*, 15(3), pp.373-390.
- 1094 Gelman, A., Hill, J. and Yajima, M., 2012. Why we (usually) don't have to worry about multiple  
1095 comparisons. *Journal of Research on Educational Effectiveness*, 5(2), pp.189-211.
- 1096 Grootswagers, T., Cichy, R.M. and Carlson, T.A., 2018. Finding decodable information that can be read  
1097 out in behaviour. *NeuroImage*, 179, pp.252-262.
- 1098 Grootswagers, T., Robinson, A.K. and Carlson, T.A., 2019. The representational dynamics of visual  
1099 objects in rapid serial visual processing streams. *NeuroImage*, 188, pp.668-679.
- 1100 Grootswagers, T., Wardle, S.G. and Carlson, T.A., 2017. Decoding dynamic brain patterns from evoked  
1101 responses: A tutorial on multivariate pattern analysis applied to time series neuroimaging data. *Journal of*  
1102 *cognitive neuroscience*, 29(4), pp.677-697.
- 1103 Guo, L., Rivero, D., Seoane, J.A. and Pazos, A., 2009. Classification of EEG signals using relative  
1104 wavelet energy and artificial neural networks. In *Proceedings of the first ACM/SIGEVO Summit on*  
1105 *Genetic and Evolutionary Computation* (pp. 177-184).
- 1106 Hacker, C.D., Snyder, A.Z., Pahwa, M., Corbetta, M. and Leuthardt, E.C., 2017. Frequency-specific  
1107 electrophysiologic correlates of resting state fMRI networks. *Neuroimage*, 149, pp.446-457.
- 1108 Hatamimajoumerd, E. and Talebpour, A., 2019. A Temporal neural trace of wavelet coefficients in human  
1109 object vision: an MEG study. *Frontiers in neural circuits*, 13, p.20.
- 1110 Hatamimajoumerd, E., Talebpour, A. and Mohsenzadeh, Y., 2019. Enhancing multivariate pattern  
1111 analysis for magnetoencephalography through relevant sensor selection. *International Journal of Imaging*  
1112 *Systems and Technology*.
- 1113 Haxby, J.V., Gobbini, M.I., Furey, M.L., Ishai, A., Schouten, J.L. and Pietrini, P., 2001. Distributed and  
1114 overlapping representations of faces and objects in ventral temporal cortex. *Science*, 293(5539), pp.2425-  
1115 2430.
- 1116 Haynes, J.D. and Rees, G., 2006. Decoding mental states from brain activity in humans. *Nature Reviews*  
1117 *Neuroscience*, 7(7), pp.523-534.

- 1118 Hebart, M.N. and Baker, C.I., 2018. Deconstructing multivariate decoding for the study of brain function.  
1119 Neuroimage, 180, pp.4-18.
- 1120 Hermundstad, A.M., Briguglio, J.J., Conte, M.M., Victor, J.D., Balasubramanian, V. and Tkačik, G., 2014.  
1121 Variance predicts salience in central sensory processing. *Elife*, 3, p.e03722.
- 1122 Higuchi, T., 1988. Approach to an irregular time series on the basis of the fractal theory. *Physica D:  
1123 Nonlinear Phenomena*, 31(2), pp.277-283.
- 1124 Hjorth, B., 1970. EEG analysis based on time domain properties. *Electroencephalography and clinical  
1125 neurophysiology*, 29(3), pp.306-310.
- 1126 Hung, C.P., Kreiman, G., Poggio, T. and DiCarlo, J.J., 2005. Fast readout of object identity from macaque  
1127 inferior temporal cortex. *Science*, 310(5749), pp.863-866.
- 1128 Iranmanesh, S. and Rodriguez-Villegas, E., 2017. An ultralow-power sleep spindle detection system on  
1129 chip. *IEEE transactions on biomedical circuits and systems*, 11(4), pp.858-866.
- 1130 Isik, L., Meyers, E.M., Leibo, J.Z. and Poggio, T., 2014. The dynamics of invariant object recognition in  
1131 the human visual system. *Journal of neurophysiology*, 111(1), pp.91-102.
- 1132 Jadidi, A.F., Zargar, B.S. and Moradi, M.H., 2016, November. Categorizing visual objects; using ERP  
1133 components. In *2016 23rd Iranian Conference on Biomedical Engineering and 2016 1st International  
1134 Iranian Conference on Biomedical Engineering (ICBME)* (pp. 159-164). IEEE.
- 1135 Jeffreys, H., 1998. *The theory of probability*. OUP Oxford.
- 1136 Joshi, D., Panigrahi, B.K., Anand, S. and Santhosh, J., 2018. Classification of Targets and Distractors  
1137 Present in Visual Hemifields Using Time-Frequency Domain EEG Features. *Journal of healthcare  
1138 engineering*, 2018.
- 1139 Kaneshiro, B., Guimaraes, M.P., Kim, H.S., Norcia, A.M. and Suppes, P., 2015. A representational  
1140 similarity analysis of the dynamics of object processing using single-trial EEG classification. *Plos  
1141 one*, 10(8).
- 1142 Karakaş, S., Erzenin, Ö.U. and Başar, E., 2000. The genesis of human event-related responses  
1143 explained through the theory of oscillatory neural assemblies. *Neuroscience Letters*, 285(1), pp.45-48.
- 1144 Karimi Rouzbahani, H. and Daliri, M.R., 2011. Diagnosis of Parkinson's disease in human using voice  
1145 signals. *Basic and Clinical Neuroscience*, 2(3), pp.12-20.
- 1146 Karimi-Rouzbahani, H., 2018. Three-stage processing of category and variation information by entangled  
1147 interactive mechanisms of peri-occipital and peri-frontal cortices. *Scientific reports*, 8(1), pp.1-22.
- 1148 Karimi-Rouzbahani, H., Bagheri, N. and Ebrahimpour, R., 2017a. Average activity, but not variability, is  
1149 the dominant factor in the representation of object categories in the brain. *Neuroscience*, 346, pp.14-28.
- 1150 Karimi-Rouzbahani, H., Bagheri, N. and Ebrahimpour, R., 2017b. Hard-wired feed-forward visual  
1151 mechanisms of the brain compensate for affine variations in object recognition. *Neuroscience*, 349,  
1152 pp.48-63.
- 1153 Karimi-Rouzbahani, H., Bagheri, N. and Ebrahimpour, R., 2017c. Invariant object recognition is a  
1154 personalized selection of invariant features in humans, not simply explained by hierarchical feed-forward  
1155 vision models. *Scientific reports*, 7(1), pp.1-24.
- 1156 Karimi-Rouzbahani, H., Ramezani, F., Woolgar, A., Rich, A.N., Ghodrati, M., 2021a. Perceptual difficulty  
1157 modulates the direction of information flow in familiar face recognition. *NeuroImage*, 233, 117896.

- 1158 Karimi-Rouzbahani, H., Vahab, E., Ebrahimpour, R. and Menhaj, M.B., 2019. Spatiotemporal analysis of  
1159 category and target-related information processing in the brain during object detection. *Behavioural brain*  
1160 *research*, 362, pp.224-239.
- 1161 Karimi-Rouzbahani, H., Woolgar, A. and Rich, A.N., 2021b. Neural signatures of vigilance decrements  
1162 predict behavioural errors before they occur. *eLife*, 10:e60563.
- 1163 Katz, M.J., 1988. Fractals and the analysis of waveforms. *Computers in biology and medicine*, 18(3),  
1164 pp.145-156.
- 1165 Kayser, C., Montemurro, M.A., Logothetis, N.K. and Panzeri, S., 2009. Spike-phase coding boosts and  
1166 stabilizes information carried by spatial and temporal spike patterns. *Neuron*, 61(4), pp.597-608.
- 1167 Kiani, R., Esteky, H., Mirpour, K. and Tanaka, K., 2007. Object category structure in response patterns of  
1168 neuronal population in monkey inferior temporal cortex. *Journal of neurophysiology*, 97(6), pp.4296-4309.
- 1169 Kosciessa, J.Q., Lindenberger, U. and Garrett, D.D., 2021. Thalamocortical excitability modulation guides  
1170 human perception under uncertainty. *Nature Communications*, 12(1), pp.1-15.
- 1171 Kriegeskorte, N., Mur, M., Ruff, D.A., Kiani, R., Bodurka, J., Esteky, H., Tanaka, K. and Bandettini, P.A.,  
1172 2008. Matching categorical object representations in inferior temporal cortex of man and  
1173 monkey. *Neuron*, 60(6), pp.1126-1141.
- 1174 Langner, R. and Eickhoff, S.B., 2013. Sustaining attention to simple tasks: a meta-analytic review of the  
1175 neural mechanisms of vigilant attention. *Psychological bulletin*, 139(4), p.870.
- 1176 Le Van Quyen, M., Foucher, J., Lachaux, J.P., Rodriguez, E., Lutz, A., Martinerie, J. and Varela, F.J.,  
1177 2001. Comparison of Hilbert transform and wavelet methods for the analysis of neuronal synchrony.  
1178 *Journal of neuroscience methods*, 111(2), pp.83-98.
- 1179 Lee, M.D. and Wagenmakers, E.J., 2005. Bayesian statistical inference in psychology: Comment on  
1180 Trafimow (2003).
- 1181 Lempel, A. and Ziv, J., 1976. On the complexity of finite sequences. *IEEE Transactions on information*  
1182 *theory*, 22(1), pp.75-81.
- 1183 Liu, H., Agam, Y., Madsen, J.R. and Kreiman, G., 2009. Timing, timing, timing: fast decoding of object  
1184 information from intracranial field potentials in human visual cortex. *Neuron*, 62(2), pp.281-290.
- 1185 Majima, K., Matsuo, T., Kawasaki, K., Kawai, K., Saito, N., Hasegawa, I. and Kamitani, Y., 2014.  
1186 Decoding visual object categories from temporal correlations of ECoG signals. *Neuroimage*, 90, pp.74-83.
- 1187 Mazaheri, A. and Jensen, O., 2008. Asymmetric amplitude modulations of brain oscillations generate  
1188 slow evoked responses. *Journal of Neuroscience*, 28(31), pp.7781-7787.
- 1189 Miyakawa, N., Majima, K., Sawahata, H., Kawasaki, K., Matsuo, T., Kotake, N., Suzuki, T., Kamitani, Y.  
1190 and Hasegawa, I., 2018. Heterogeneous Redistribution of Facial Subcategory Information Within and  
1191 Outside the Face-Selective Domain in Primate Inferior Temporal Cortex. *Cerebral Cortex*, 28(4), pp.1416-  
1192 1431.
- 1193 Montemurro, M.A., Rasch, M.J., Murayama, Y., Logothetis, N.K. and Panzeri, S., 2008. Phase-of-firing  
1194 coding of natural visual stimuli in primary visual cortex. *Current biology*, 18(5), pp.375-380.
- 1195 Mostame, P. and Sadaghiani, S., 2020. Phase-and amplitude-coupling are tied by an intrinsic spatial  
1196 organization but show divergent stimulus-related changes. *Neuroimage*, 219, p.117051.
- 1197 Namazi, H., Ala, T.S. and Bakardjian, H., 2018. Decoding of steady-state visual evoked potentials by  
1198 fractal analysis of the electroencephalographic (EEG) signal. *Fractals*, 26(06), p.1850092.

- 1199 Ng, B.S.W., Logothetis, N.K. and Kayser, C., 2013. EEG phase patterns reflect the selectivity of neural  
1200 firing. *Cerebral Cortex*, 23(2), pp.389-398.
- 1201 Orbán, G., Berkes, P., Fiser, J. and Lengyel, M., 2016. Neural variability and sampling-based probabilistic  
1202 representations in the visual cortex. *Neuron*, 92(2), pp.530-543.
- 1203 Panzeri, S., Brunel, N., Logothetis, N.K. and Kayser, C., 2010. Sensory neural codes using multiplexed  
1204 temporal scales. *Trends in neurosciences*, 33(3), pp.111-120.
- 1205 Pincus, S.M. and Huang, W.M., 1992. Approximate entropy: statistical properties and  
1206 applications. *Communications in Statistics-Theory and Methods*, 21(11), pp.3061-3077.
- 1207 Pouryazdian, S. and Erfanian, A., 2009. Detection of steady-state visual evoked potentials for brain-  
1208 computer interfaces using PCA and high-order statistics. In *World Congress on Medical Physics and  
1209 Biomedical Engineering*, September 7-12, 2009, Munich, Germany (pp. 480-483). Springer, Berlin,  
1210 Heidelberg.
- 1211 Preißl, H., Lutzenberger, W., Pulvermüller, F. and Birbaumer, N., 1997. Fractal dimensions of short EEG  
1212 time series in humans. *Neuroscience letters*, 225(2), pp.77-80.
- 1213 Procaccia, I., 1988. Universal properties of dynamically complex systems: the organization of chaos.  
1214 *Nature*, 333(6174), pp.618-623.
- 1215 Pulini, A.A., Kerr, W.T., Loo, S.K. and Lenartowicz, A., 2019. Classification accuracy of neuroimaging  
1216 biomarkers in attention-deficit/hyperactivity disorder: Effects of sample size and circular analysis.  
1217 *Biological Psychiatry: Cognitive Neuroscience and Neuroimaging*, 4(2), pp.108-120.
- 1218 Qin, Y., Zhan, Y., Wang, C., Zhang, J., Yao, L., Guo, X., Wu, X. and Hu, B., 2016. Classifying four-  
1219 category visual objects using multiple ERP components in single-trial ERP. *Cognitive  
1220 neurodynamics*, 10(4), pp.275-285.
- 1221 Racine, R., 2011. Estimating the Hurst exponent. Zurich: Mosaic Group.
- 1222 Rajalingham, R., Schmidt, K. and DiCarlo, J.J., 2015. Comparison of object recognition behavior in  
1223 human and monkey. *Journal of Neuroscience*, 35(35), pp.12127-12136.
- 1224 Rasoulzadeh, V.E.S.A.L., Erkus, E.C., Yogurt, T.A., Ulusoy, I. and Zergeroğlu, S.A., 2017. A comparative  
1225 stationarity analysis of EEG signals. *Annals of Operations Research*, 258(1), pp.133-157.
- 1226 Richman, J.S. and Moorman, J.R., 2000. Physiological time-series analysis using approximate entropy  
1227 and sample entropy. *American Journal of Physiology-Heart and Circulatory Physiology*, 278(6),  
1228 pp.H2039-H2049.
- 1229 Ritchie, J.B., Tovar, D.A. and Carlson, T.A., 2015. Emerging object representations in the visual system  
1230 predict reaction times for categorization. *PLoS computational biology*, 11(6).
- 1231 Rossion, B., Gauthier, I., Tarr, M.J., Despland, P., Bruyer, R., Linotte, S. and Crommelinck, M., 2000. The  
1232 N170 occipito-temporal component is delayed and enhanced to inverted faces but not to inverted objects:  
1233 an electrophysiological account of face-specific processes in the human brain. *Neuroreport*, 11(1), pp.69-  
1234 72.
- 1235 Rouder, J.N., Morey, R.D., Speckman, P.L. and Province, J.M., 2012. Default Bayes factors for ANOVA  
1236 designs. *Journal of Mathematical Psychology*, 56(5), pp.356-374.
- 1237 Rousselet, G.A., Husk, J.S., Bennett, P.J. and Sekuler, A.B., 2007. Single-trial EEG dynamics of object  
1238 and face visual processing. *Neuroimage*, 36(3), pp.843-862.

- 1239 Rupp, K., Roos, M., Milsap, G., Caceres, C., Ratto, C., Chevillet, M., Crone, N.E. and Wolmetz, M., 2017.  
1240 Semantic attributes are encoded in human electrocorticographic signals during visual object  
1241 recognition. *NeuroImage*, 148, pp.318-329.
- 1242 Sammer, G., 1999. Working memory load and EEG-dynamics as revealed by point correlation dimension  
1243 analysis. *International journal of psychophysiology*, 34(1), pp.89-102.
- 1244 Shourie, N., Firoozabadi, M. and Badie, K., 2014. Analysis of EEG signals related to artists and nonartists  
1245 during visual perception, mental imagery, and rest using approximate entropy. *BioMed research*  
1246 *international*, 2014.
- 1247 Siegel, M., Donner, T.H. and Engel, A.K., 2012. Spectral fingerprints of large-scale neuronal interactions.  
1248 *Nature Reviews Neuroscience*, 13(2), pp.121-134.
- 1249 Siems, M. and Siegel, M., 2020. Dissociated neuronal phase-and amplitude-coupling patterns in the  
1250 human brain. *NeuroImage*, 209, p.116538.
- 1251 Simanova, I., Van Gerven, M., Oostenveld, R. and Hagoort, P., 2010. Identifying object categories from  
1252 event-related EEG: toward decoding of conceptual representations. *PloS one*, 5(12).
- 1253 Stam, C.J., 2000. Brain dynamics in theta and alpha frequency bands and working memory performance  
1254 in humans. *Neuroscience letters*, 286(2), pp.115-118.
- 1255 Stam, C.J., 2005. Nonlinear dynamical analysis of EEG and MEG: review of an emerging field. *Clinical*  
1256 *neurophysiology*, 116(10), pp.2266-2301.
- 1257 Stepien, R.A., 2002. Testing for non-linearity in EEG signal of healthy subjects. *Acta neurobiologiae*  
1258 *experimentalis*, 62(4), pp.277-282.
- 1259 Stewart, A.X., Nuthmann, A. and Sanguinetti, G., 2014. Single-trial classification of EEG in a visual object  
1260 task using ICA and machine learning. *Journal of neuroscience methods*, 228, pp.1-14.
- 1261 Storey, J.D., 2002. A direct approach to false discovery rates. *Journal of the Royal Statistical Society:*  
1262 *Series B (Statistical Methodology)*, 64(3), pp.479-498.
- 1263 Subha, D.P., Joseph, P.K., Acharya, R. and Lim, C.M., 2010. EEG signal analysis: a survey. *Journal of*  
1264 *medical systems*, 34(2), pp.195-212.
- 1265 Szczepański, J., Amigó, J.M., Wajnryb, E. and Sanchez-Vives, M.V., 2003. Application of Lempel–Ziv  
1266 complexity to the analysis of neural discharges. *Network: Computation in Neural Systems*, 14(2), pp.335-  
1267 350.
- 1268 Tafreshi, T.F., Daliri, M.R. and Ghodousi, M., 2019. Functional and effective connectivity based features  
1269 of EEG signals for object recognition. *Cognitive neurodynamics*, 13(6), pp.555-566.
- 1270 Taghizadeh-Sarabi, M., Daliri, M.R. and Niksirat, K.S., 2015. Decoding objects of basic categories from  
1271 electroencephalographic signals using wavelet transform and support vector machines. *Brain*  
1272 *topography*, 28(1), pp.33-46.
- 1273 Tononi, G. and Edelman, G.M., 1998. Consciousness and complexity. *Science*, 282(5395), pp.1846-  
1274 1851.
- 1275 Torabi, A., Jahromy, F.Z. and Daliri, M.R., 2017. Semantic category-based classification using nonlinear  
1276 features and wavelet coefficients of brain signals. *Cognitive Computation*, 9(5), pp.702-711.
- 1277 Victor, J.D., 2000. How the brain uses time to represent and process visual information. *Brain research*,  
1278 886(1-2), pp.33-46.

- 1279 Vidal, J.R., Ossandón, T., Jerbi, K., Dalal, S.S., Minotti, L., Ryvlin, P., Kahane, P. and Lachaux, J.P.,  
1280 2010. Category-specific visual responses: an intracranial study comparing gamma, beta, alpha, and ERP  
1281 response selectivity. *Frontiers in human neuroscience*, 4, p.195.
- 1282 Vidaurre, D., Myers, N.E., Stokes, M., Nobre, A.C. and Woolrich, M.W., 2019. Temporally unconstrained  
1283 decoding reveals consistent but time-varying stages of stimulus processing. *Cerebral Cortex*, 29(2),  
1284 pp.863-874.
- 1285 Voloh, B., Oemisch, M. and Womelsdorf, T., 2020. Phase of firing coding of learning variables across the  
1286 fronto-striatal network during feature-based learning. *Nature communications*, 11(1), pp.1-16.
- 1287 Wairagkar, M., Zoulias, I., Oguntosin, V., Hayashi, Y. and Nasuto, S., 2016, June. Movement intention  
1288 based Brain Computer Interface for Virtual Reality and Soft Robotics rehabilitation using novel  
1289 autocorrelation analysis of EEG. In 2016 6th IEEE International Conference on Biomedical Robotics and  
1290 Biomechatronics (BioRob) (pp. 685-685). IEEE.
- 1291 Wang, C., Xiong, S., Hu, X., Yao, L. and Zhang, J., 2012. Combining features from ERP components in  
1292 single-trial EEG for discriminating four-category visual objects. *Journal of neural engineering*, 9(5),  
1293 p.056013.
- 1294 Wang, Y., Wang, P. and Yu, Y., 2018. Decoding English alphaAlphabet letters using EEG phase  
1295 information. *Frontiers in neuroscience*, 12, p.62.
- 1296 Wark, B., Fairhall, A. and Rieke, F., 2009. Timescales of inference in visual adaptation. *Neuron*, 61(5),  
1297 pp.750-761.
- 1298 Waschke, L., Kloosterman, N.A., Obleser, J. and Garrett, D.D., 2021. Behavior needs neural variability.  
1299 *Neuron*.
- 1300 Waschke, L., Tune, S. and Obleser, J., 2019. Local cortical desynchronization and pupil-linked arousal  
1301 differentially shape brain states for optimal sensory performance. *Elife*, 8, p.e51501.
- 1302 Watrous, A.J., Deuker, L., Fell, J. and Axmacher, N., 2015. Phase-amplitude coupling supports phase  
1303 coding in human ECoG. *Elife*, 4, p.e07886.
- 1304 Williams, M.A., Dang, S. and Kanwisher, N.G., 2007. Only some spatial patterns of fMRI response are  
1305 read out in task performance. *Nature neuroscience*, 10(6), pp.685-686.
- 1306 Wong, K.F.K., Galka, A., Yamashita, O. and Ozaki, T., 2006. Modelling non-stationary variance in EEG  
1307 time series by state space GARCH model. *Computers in biology and medicine*, 36(12), pp.1327-1335.
- 1308 Woolgar, A., Dermody, N., Afshar, S., Williams, M.A. and Rich, A.N., 2019. Meaningful patterns of  
1309 information in the brain revealed through analysis of errors. *bioRxiv*, p.673681.
- 1310 Wyart, V. and Tallon-Baudry, C., 2009. How ongoing fluctuations in human visual cortex predict  
1311 perceptual awareness: baseline shift versus decision bias. *Journal of Neuroscience*, 29(27), pp.8715-  
1312 8725.
- 1313 Zellner, A. and Siow, A., 1980. Posterior odds ratios for selected regression hypotheses. *Trabajos de*  
1314 *estadística y de investigación operativa*, 31(1), pp.585-603.
- 1315 Zheng, C. and Colgin, L.L., 2015. Beta and gamma rhythms go with the flow. *Neuron*, 85(2), pp.236-237.
- 1316

# Figures:

*Hamid Karimi-Rouzbahani et al., “Temporal variabilities provide additional category-related information in object category decoding: a systematic comparison between informative EEG features”.*



## Figure 1

### Dataset 1: paradigm

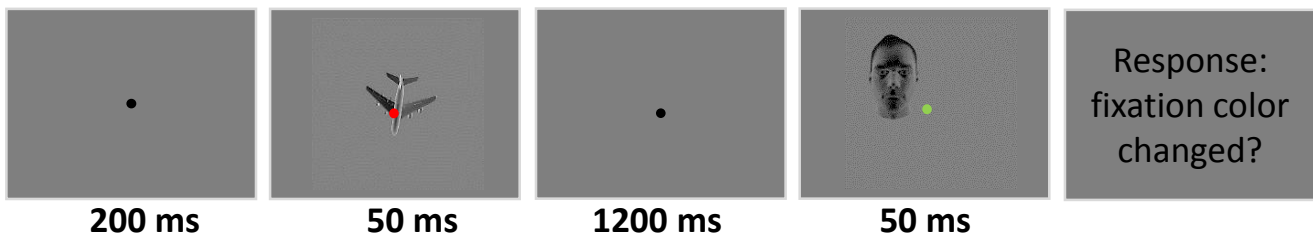

### Dataset 2: paradigm

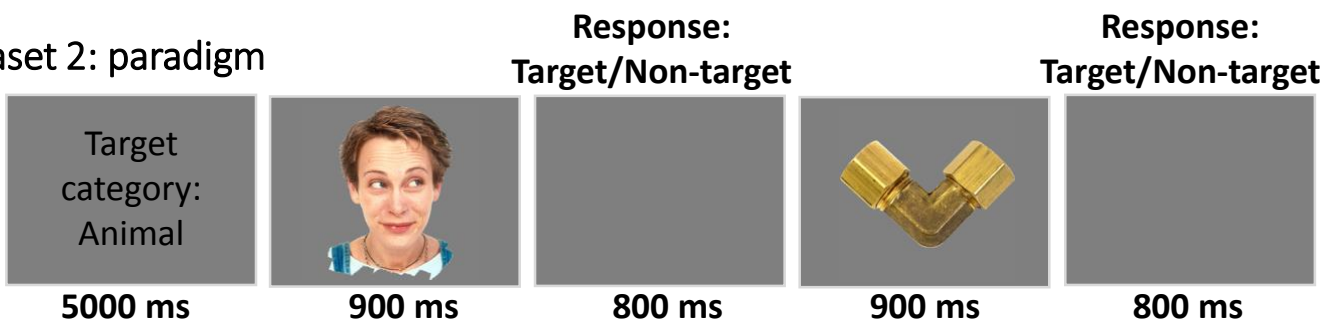

### Dataset 3: paradigm

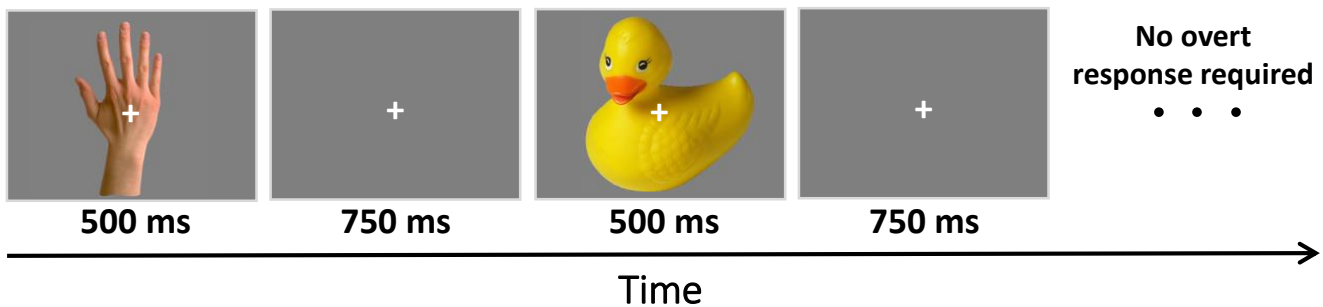

# Figure 2

**A**

bioRxiv preprint doi: <https://doi.org/10.1101/2020.09.02.279042>; this version posted May 19, 2021. The copyright holder for this preprint (which was not certified by peer review) is the author/funder, who has granted bioRxiv a license to display the preprint in perpetuity. It is made available under aCC-BY-NC-ND 4.0 International license.

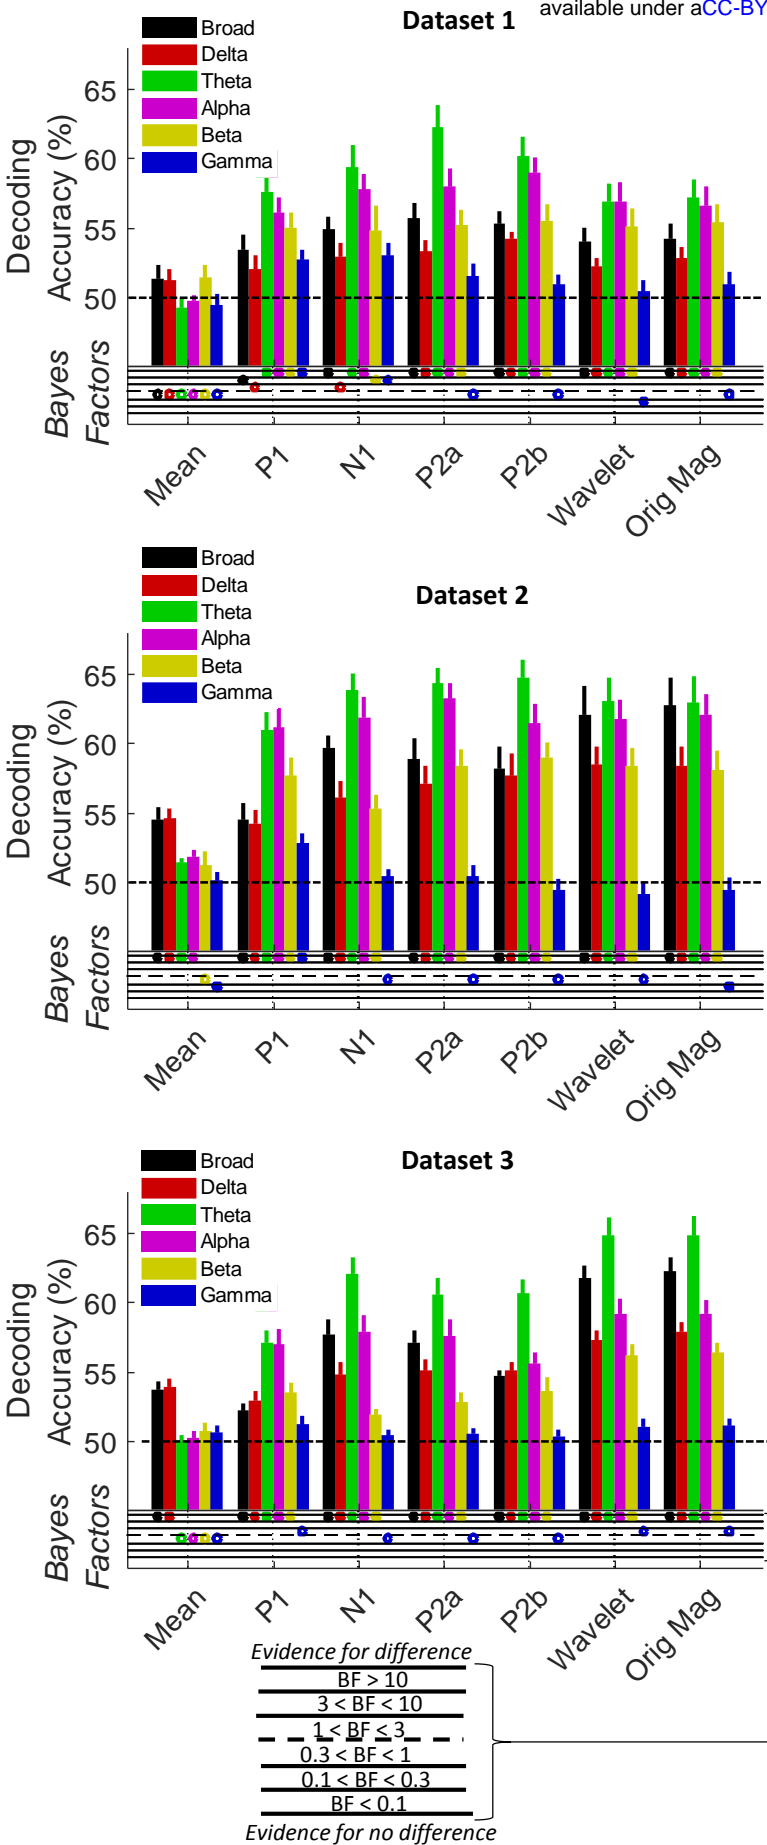

**B**

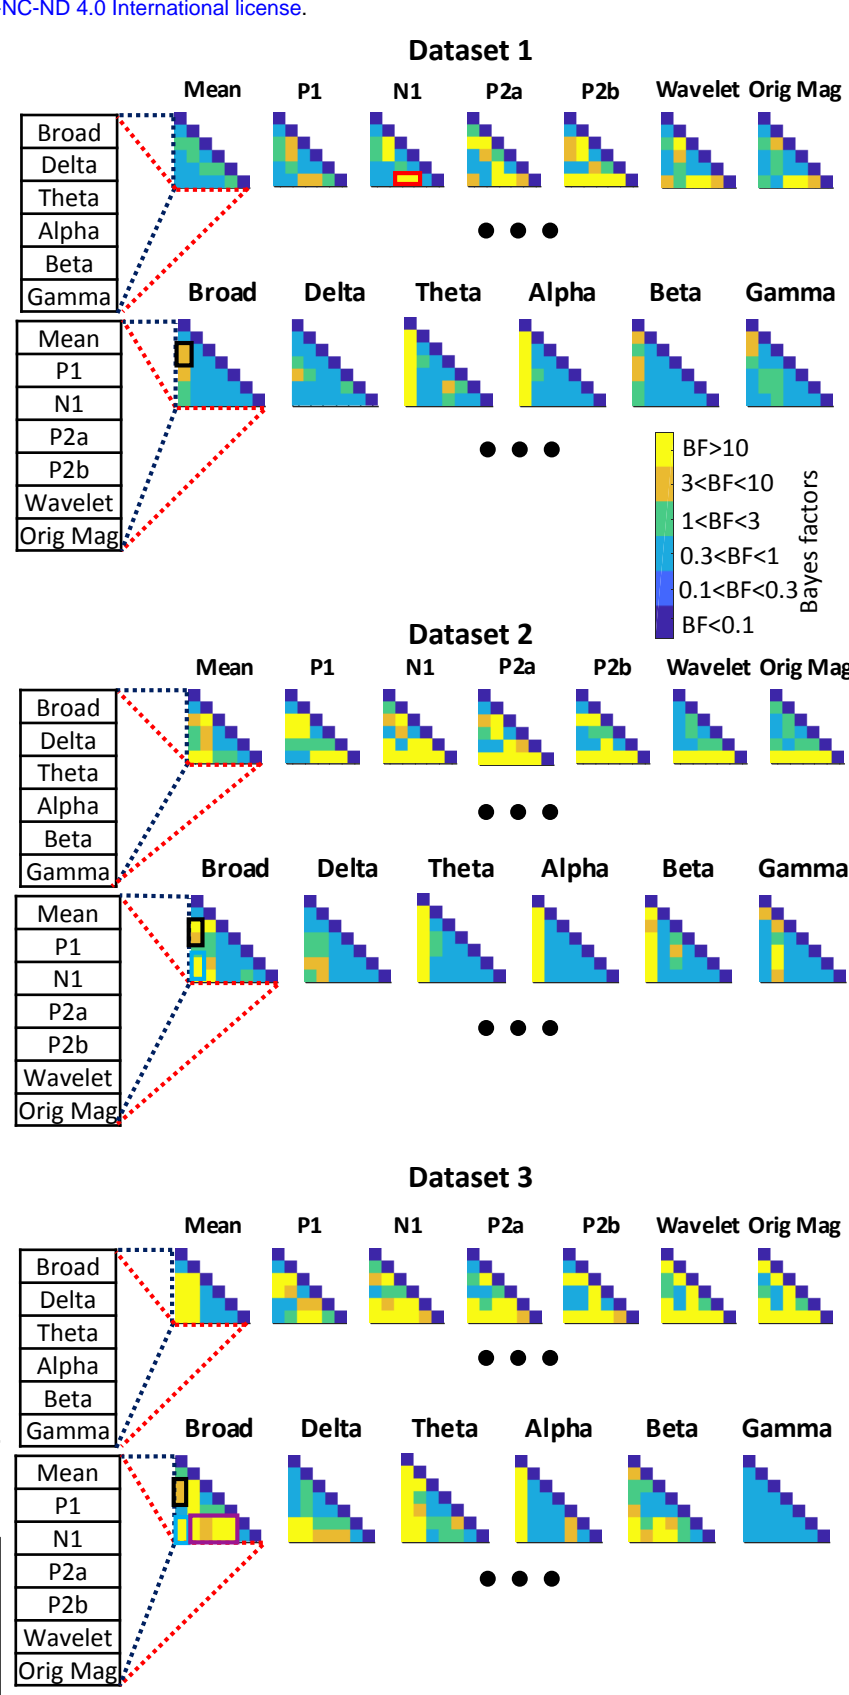

Figure 3

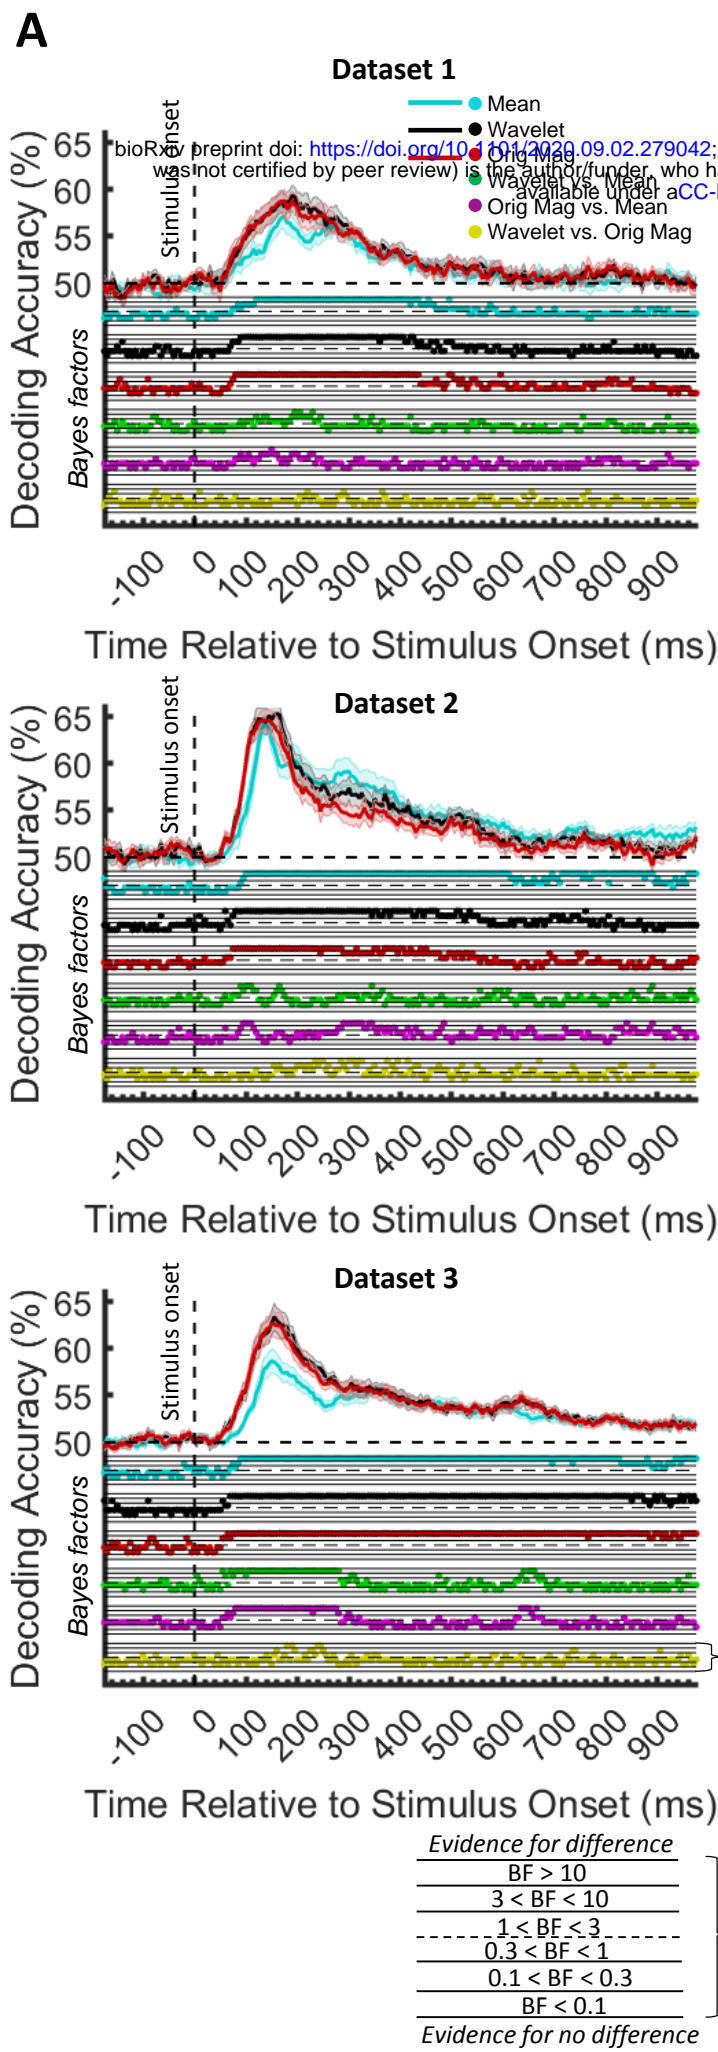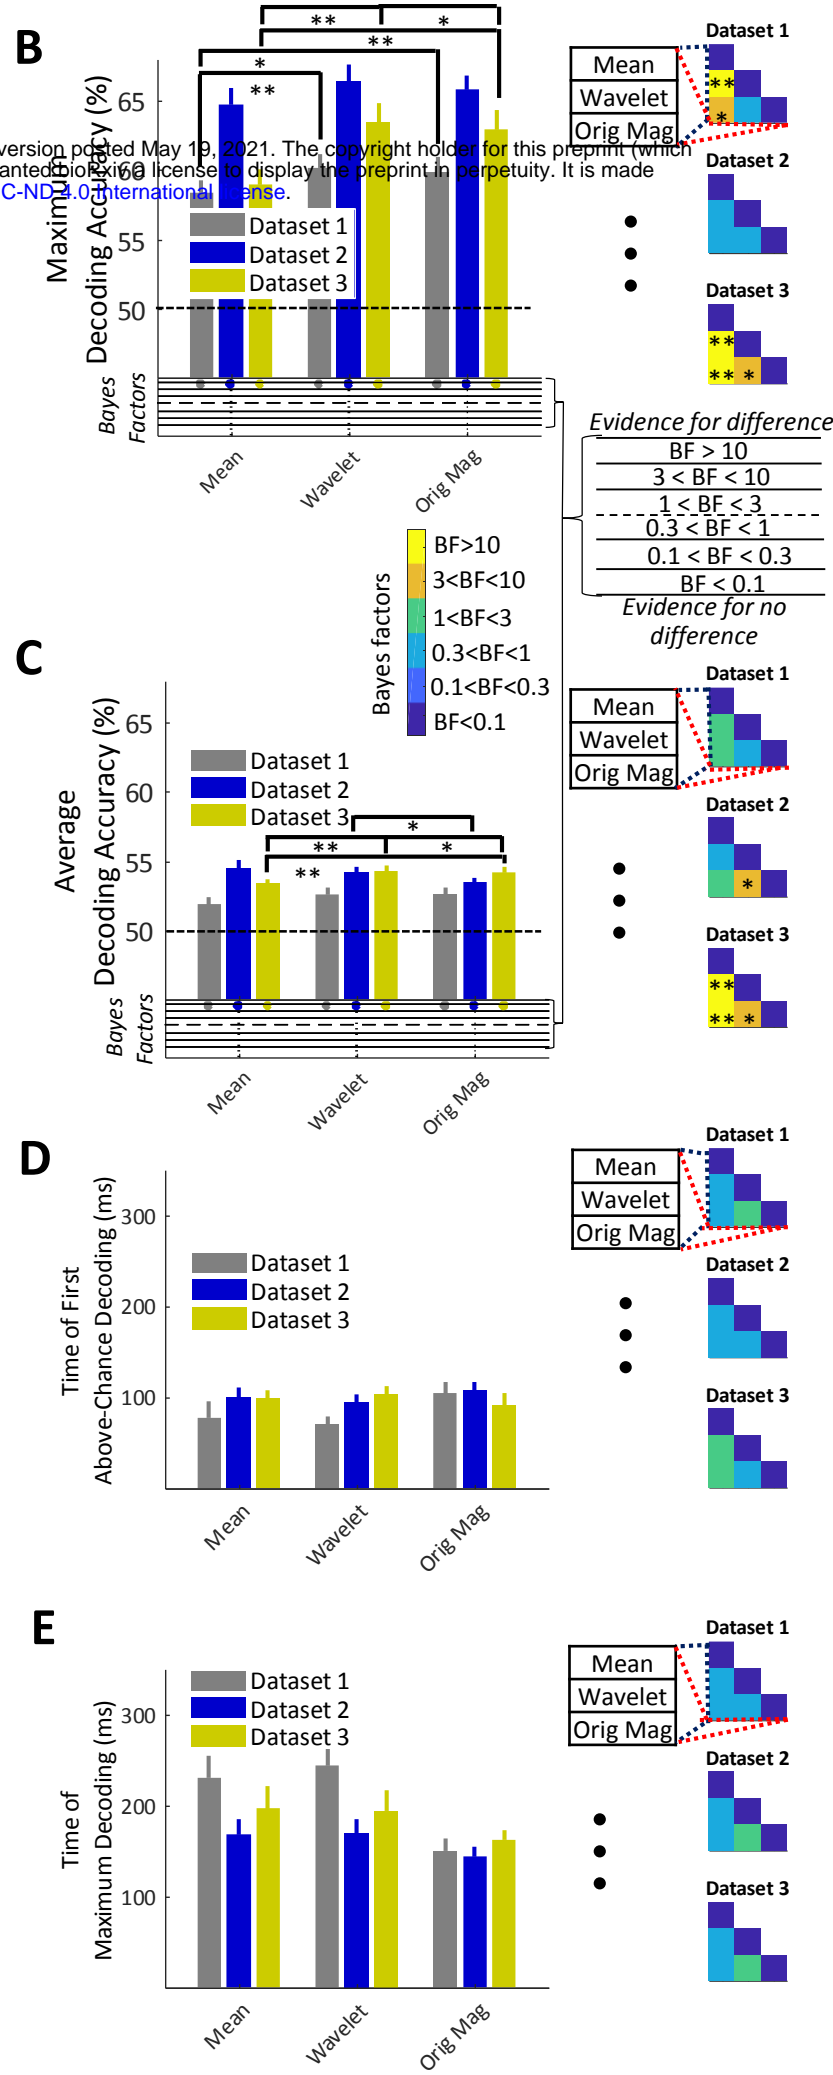

Figure 4

**A** bioRxiv preprint doi: <https://doi.org/10.1101/2020.09.02.279042>; this version posted May 19, 2021. The copyright holder for this preprint (which was not certified by peer review) is the author/funder, who has granted bioRxiv a license to display the preprint in perpetuity. It is made available under aCC-BY-NC-ND 4.0 International license.

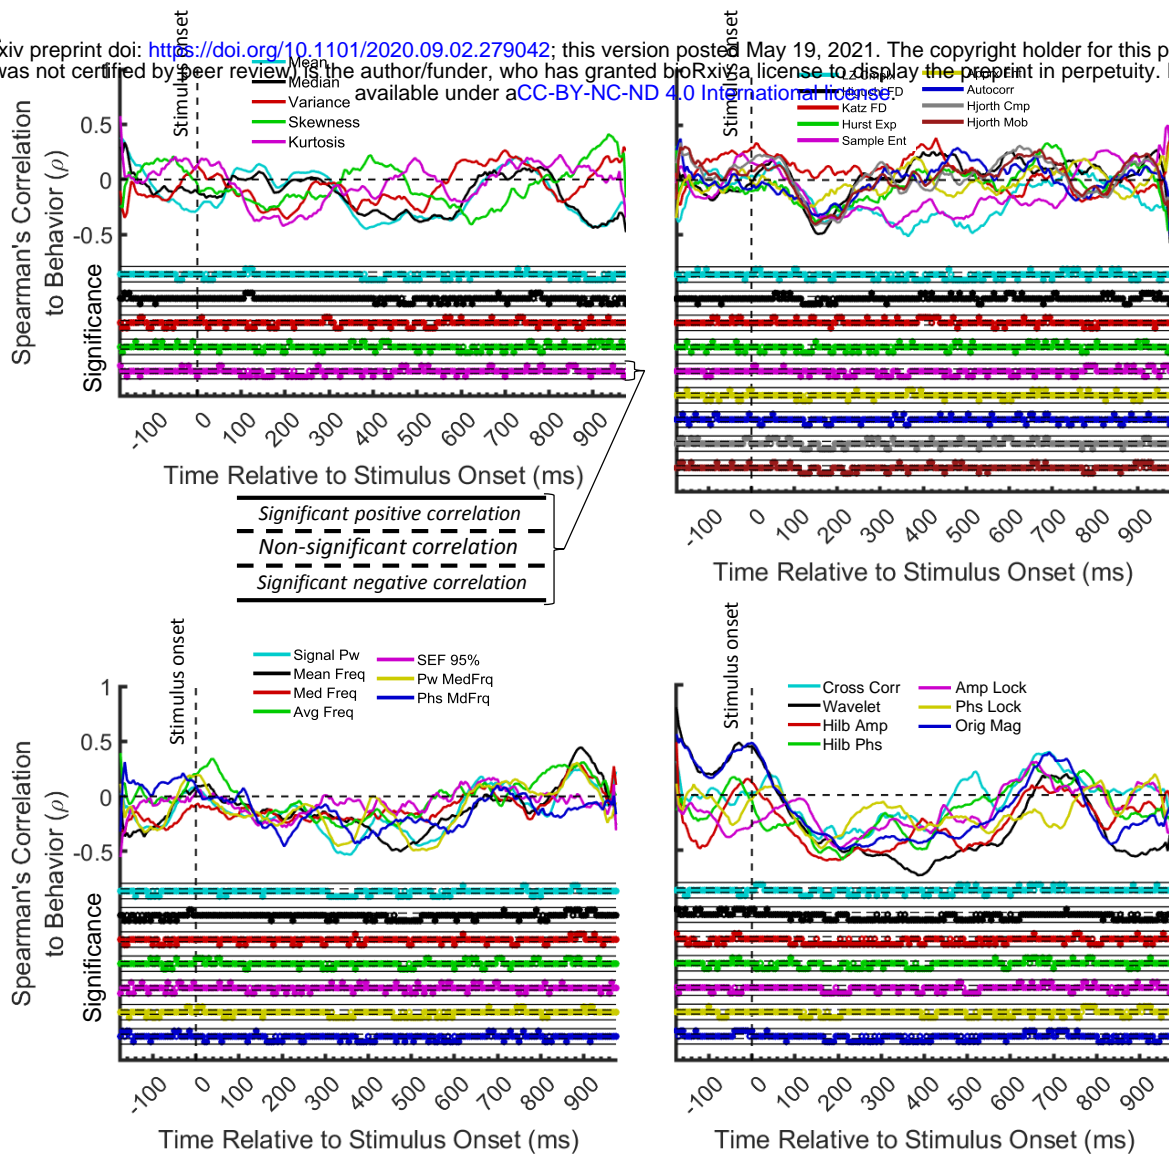

**B**

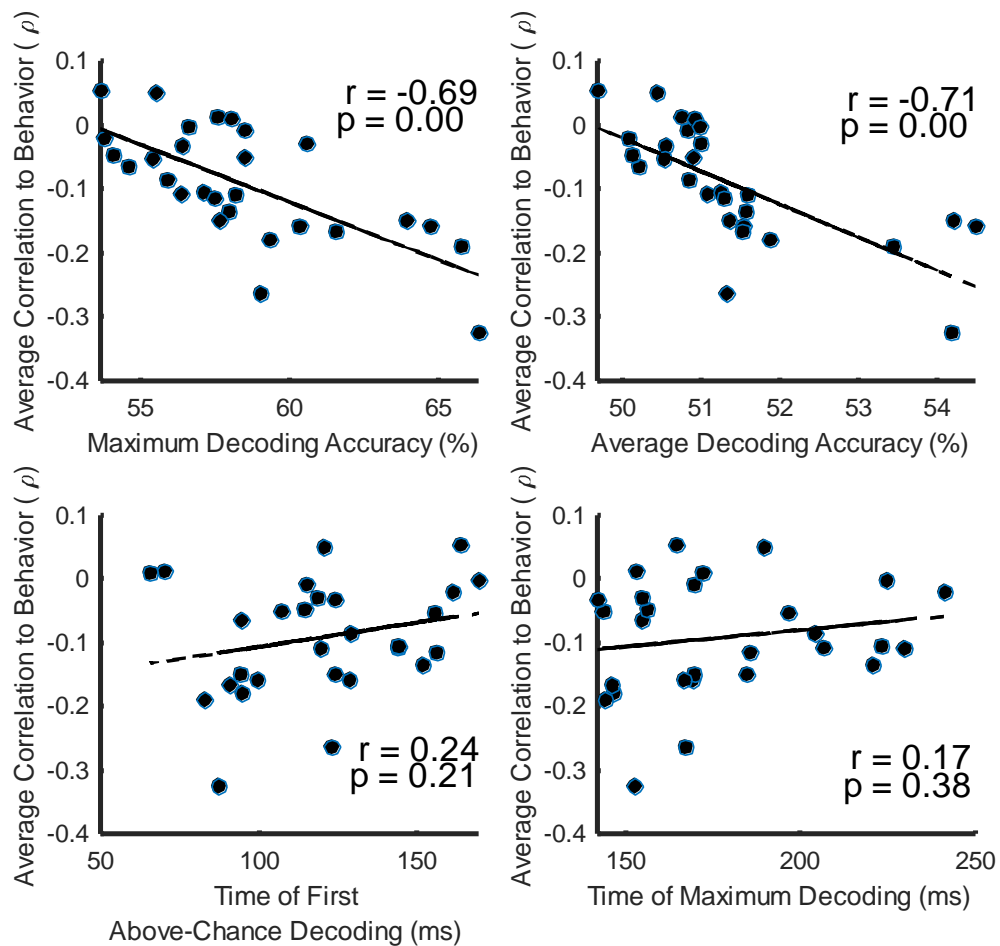

# Supplementary Materials:

*Hamid Karimi-Rouzbahani et al., "Temporal variabilities provide additional category-related information in object category decoding: a systematic comparison between informative EEG features".*

# Supplementary Figure 1

Whole-trial decoding of object categories from the three datasets using 32 features in different frequency bands (for Bayesian evidence analyses see Supplementary Figure 2). Decoding of category information using the 32 features in the 6 frequency bands. The black horizontal dashed lines on the top panel refer to chance-level decoding. Thick bars show the average decoding across participants (error bars Standard Error across participants). Bayes Factors are shown in the bottom panel of each graph: Filled circles show moderate/strong evidence for either hypothesis and empty circles indicate insufficient evidence. They show the results of Bayes factor analysis when evaluating the difference from chance-level decoding.

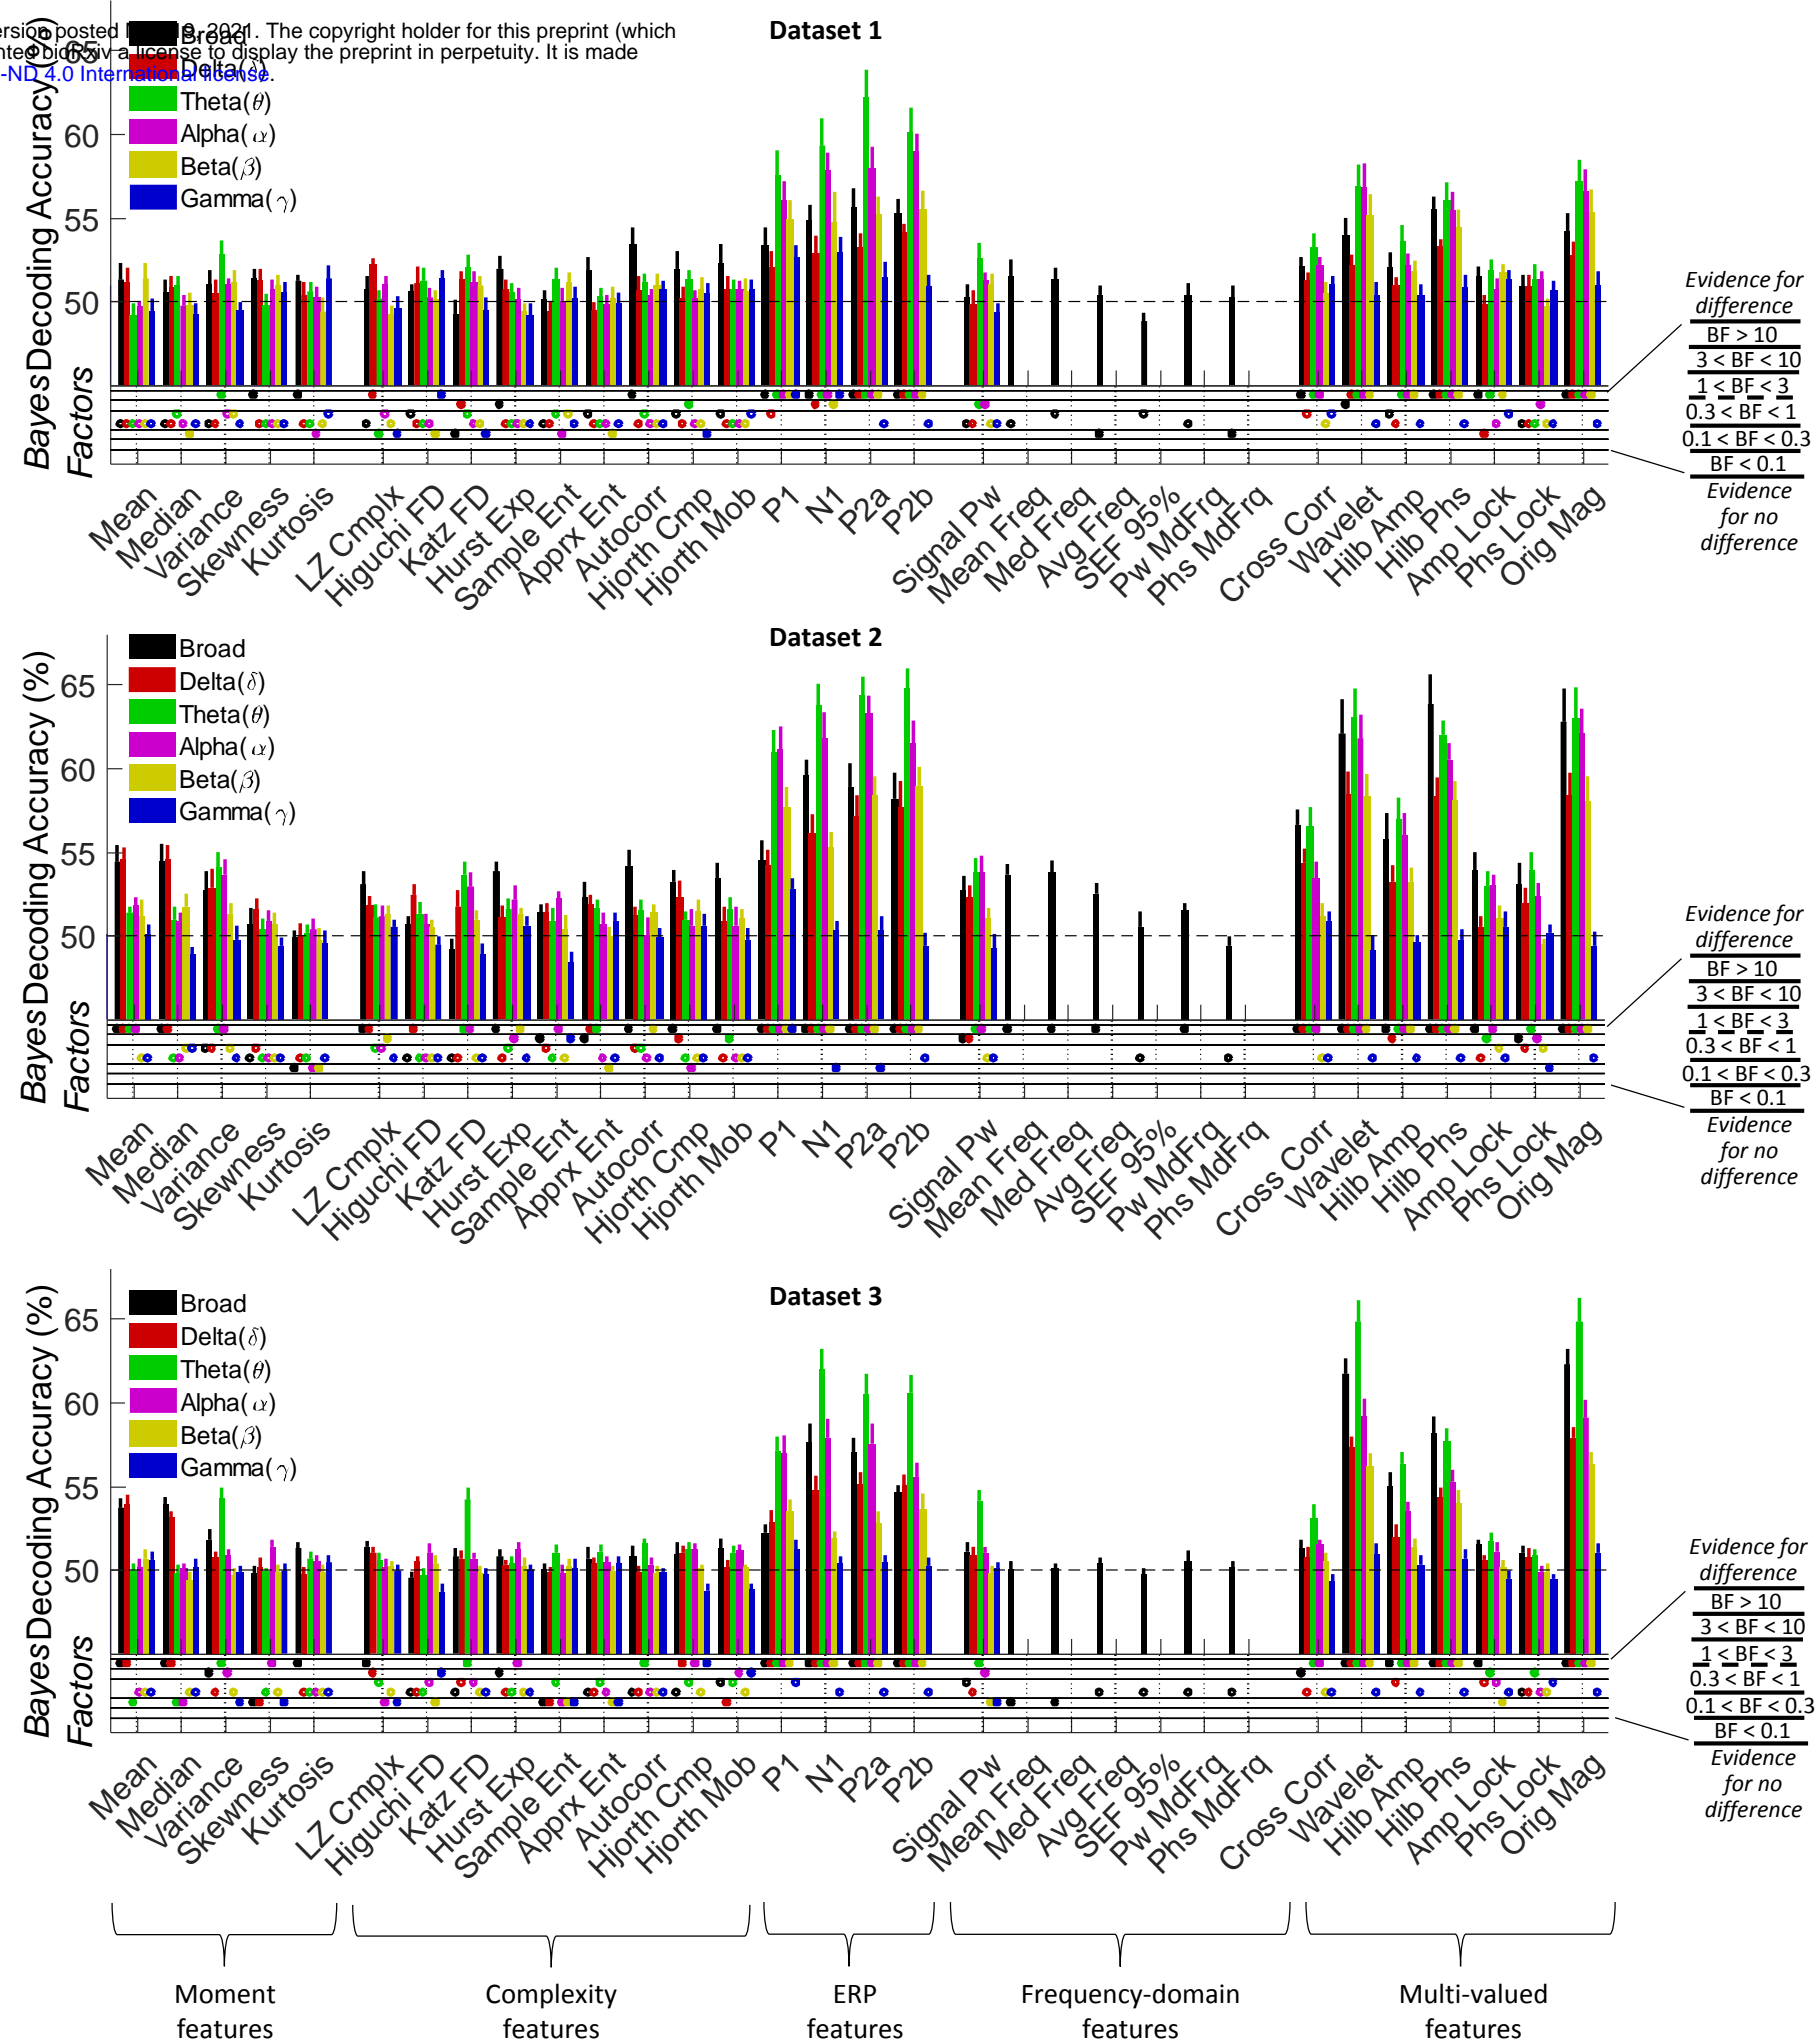

# Supplementary Figure 2

(A) Bayes factor matrices comparing whole-trial decoding results across different frequency bands and dataset separately. Matrices show different levels of evidence for existing difference (moderate  $3 < BF < 10$ , Orange; strong  $BF > 10$ , Yellow), no difference (moderate  $0.1 < BF < 0.3$ , light blue; strong  $BF < 0.1$ , dark blue) or insufficient evidence ( $BF < 0.1$ , Cyan) for either hypotheses. Black and red boxes indicate moderate or strong evidence for higher decoding values for specific features mentioned and compared in the text. For example, for Dataset 1, there is insufficient evidence for difference between decoding values of most features in the Gamma band as indicated by the light blue color in most cells. However, there is moderate or strong evidence that Mean and Median features are different from N1 and P1 as indicated by yellow color and the decoding accuracies in Supplementary Figure 1. (B) Bayes factor matrices comparing whole-trial decoding results within each frequency band, across features separated by datasets. Black and red boxes indicate moderate or strong evidence for higher decoding values for specific features mentioned and compared in the text.

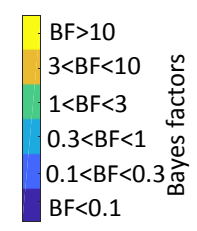

A

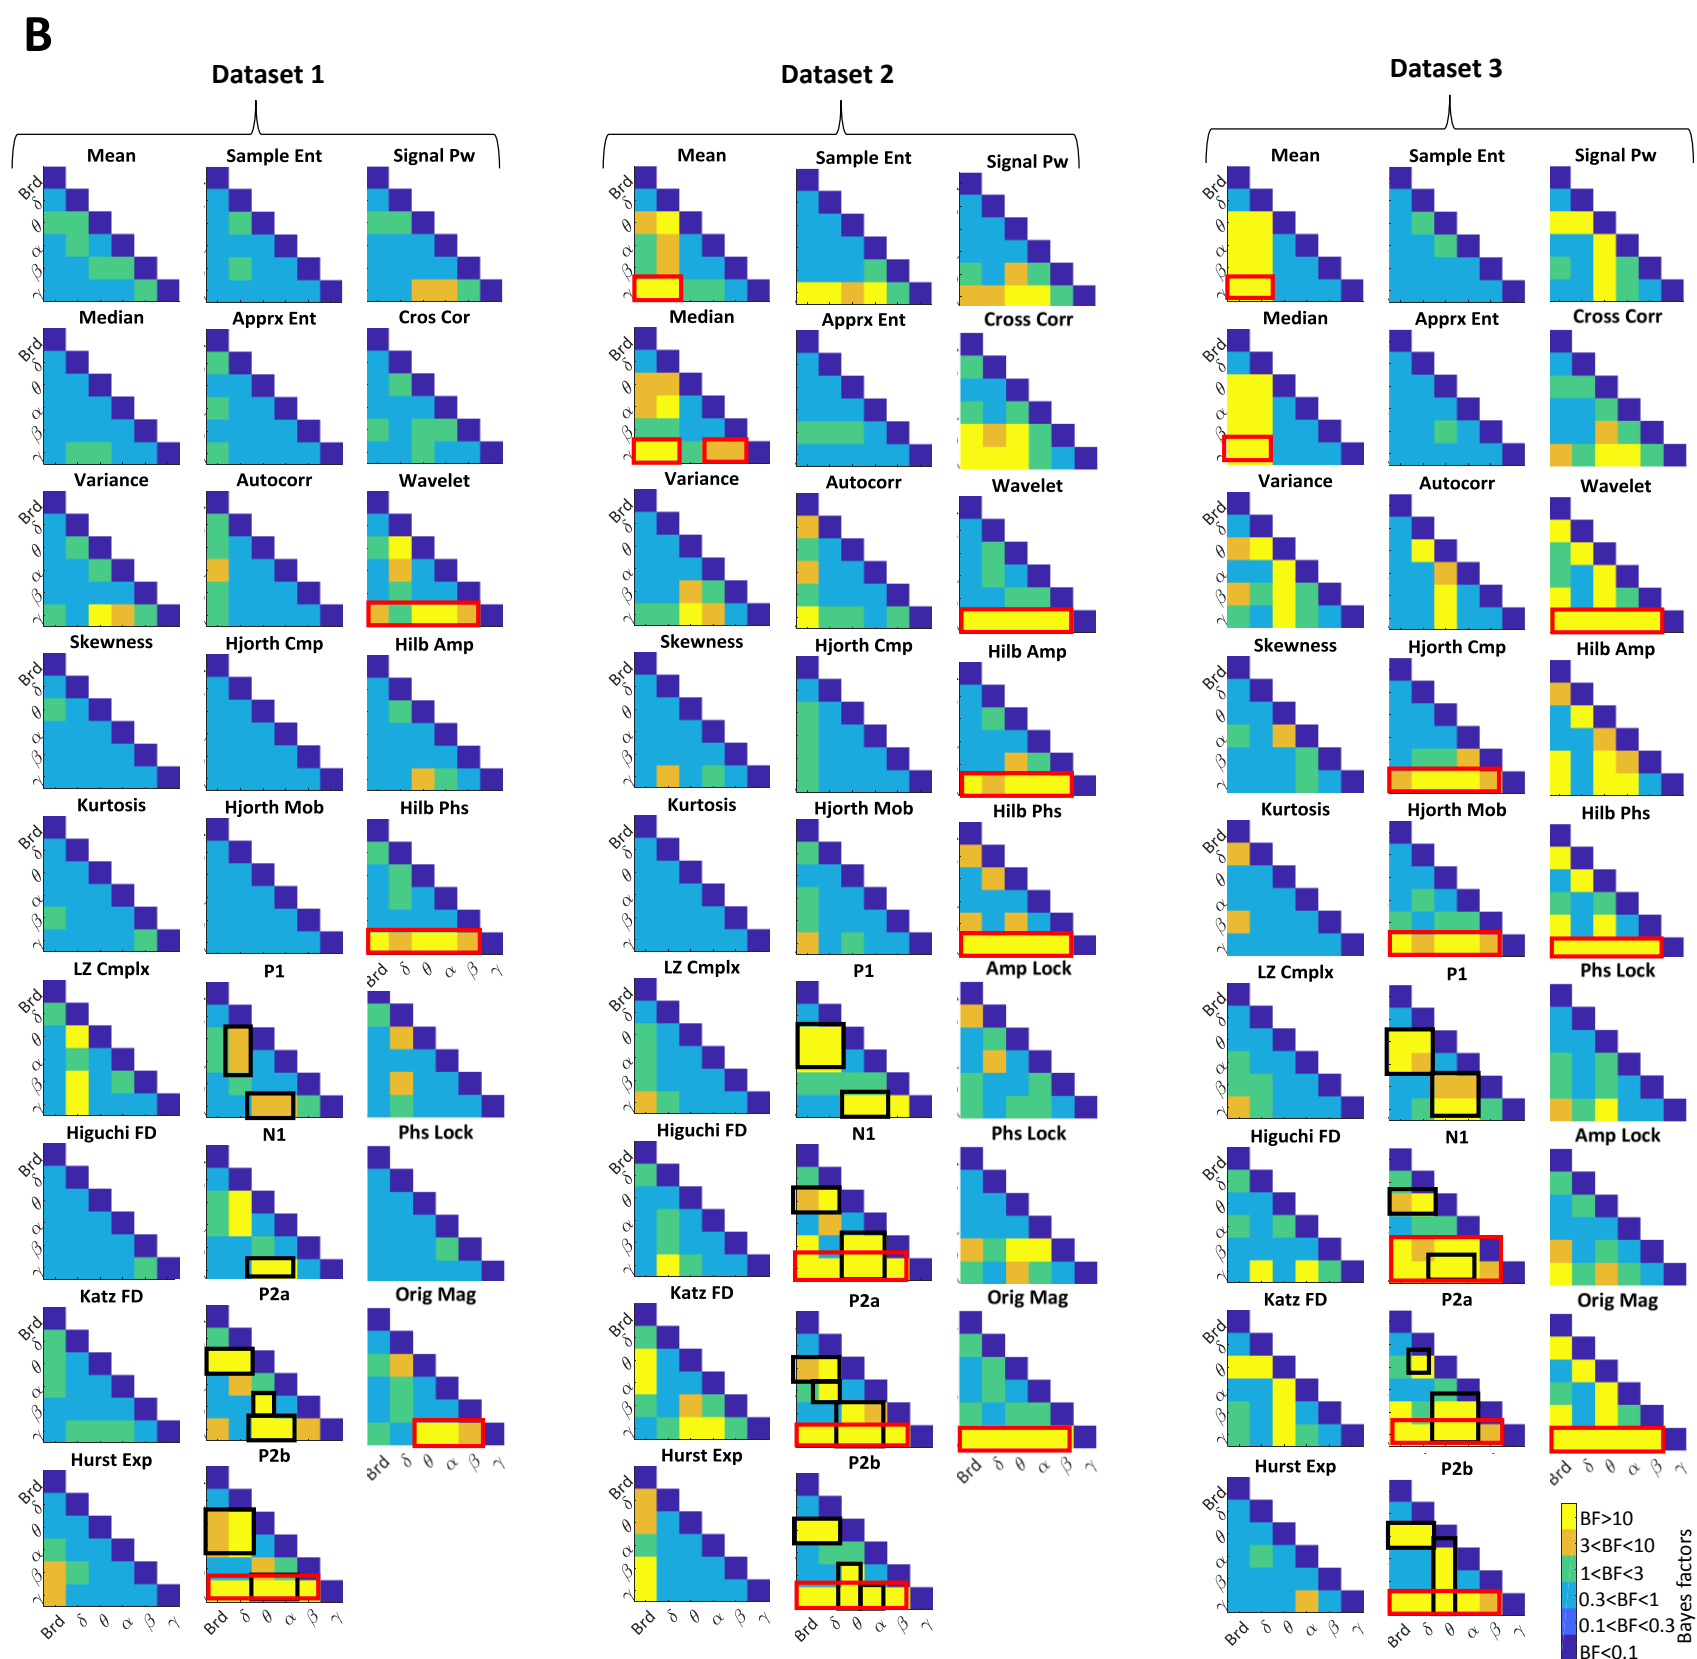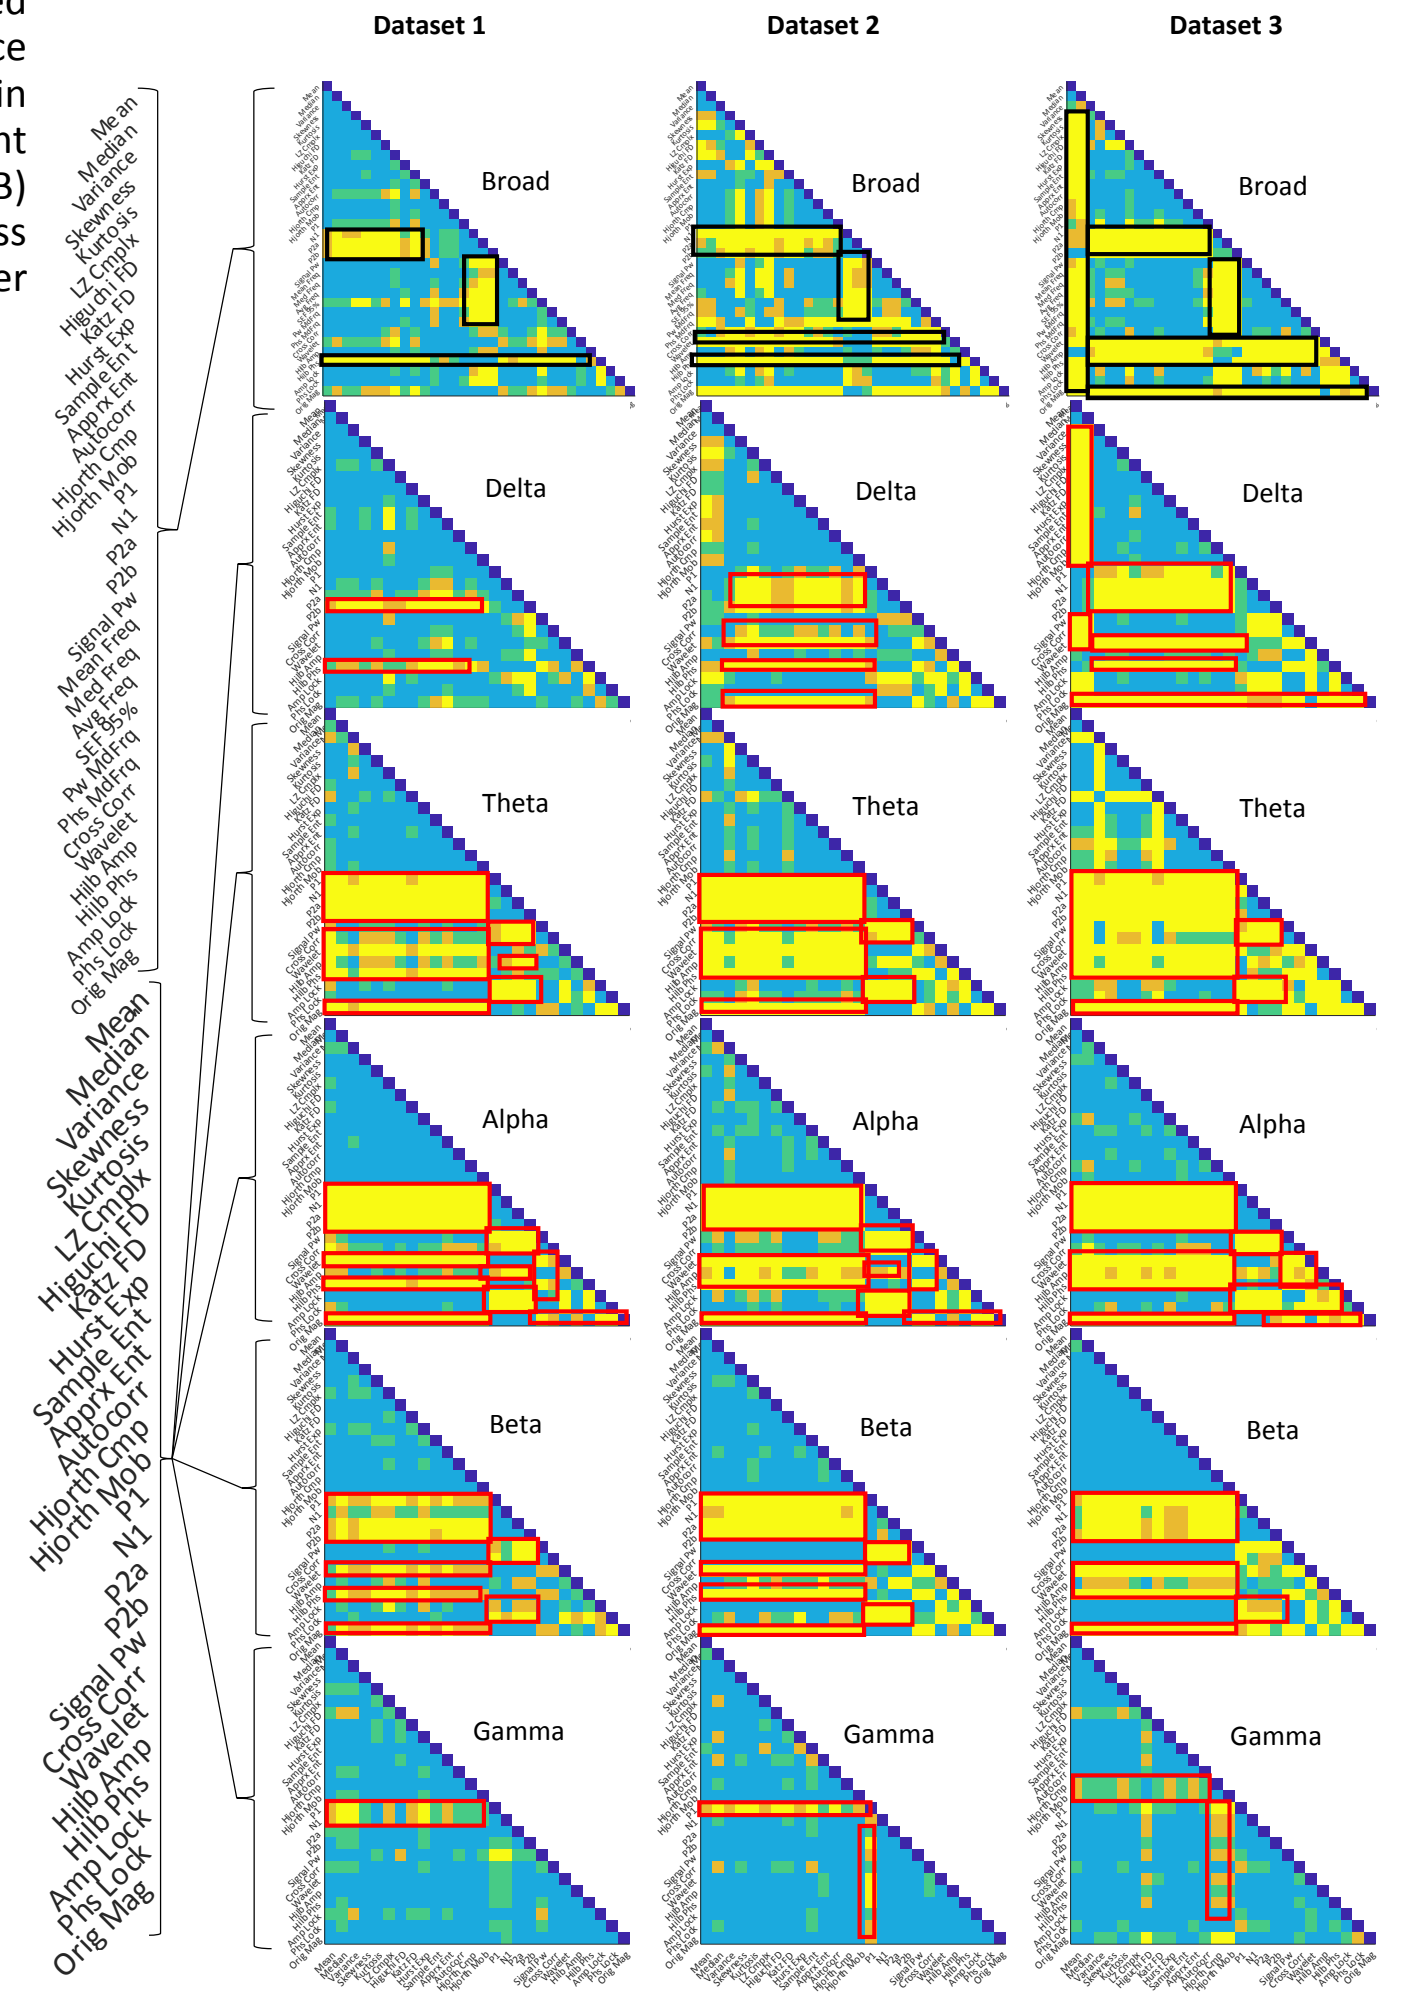

## Supplementary Figure 3

We selected the window length of 50 ms for our time-resolved analyses because it was neither too long to hide the true temporal dynamics of information processing in the brain nor too short to avoid the proper calculation of features (e.g. complexity and multi-valued). To assure that we did not miss the true obtainable dynamic range (amplitude) of accuracies, we compared category decoding obtained from time windows of 5 (i.e. which was the case in most previous studies all of which relied on signals' mean (Grootswagers et al., 2017; Karimi-Rouzbahani et al., 2017b) and 100 ms with that used here from 50 ms time windows. Consistently across the three datasets, results showed that the highest decoding accuracies were obtained from the 50 ms time windows, both in terms of maximum and average decoding accuracy after the stimulus onset. Interestingly, lengthening the time windows decreased the maximum decoding but increased the decoding accuracies in the later stages of the processing (i.e. from 200 ms onwards; probably after initial hard-wired processing of visual stimuli). This may suggest that later stages of category processing (probably involving feedback/recurrent processing; which are activated by the longer presentation time in datasets 2 and 3), take longer processing times, therefore captured better using longer time windows.

(A) Comparison of decoding accuracies using different length for the sliding time window. The bottom section shows the Bayes factor evidence for the difference between the 50 ms window and the other two window lengths. (B) Comparison of decoding accuracies using different frequency bands for the Mean (top) and Wavelet (bottom) features. Each column shows the results for one dataset. Top section in each panel shows the decoding accuracies across time and the horizontal dashed lines on the top panel refer to chance-level decoding. Filled circles in the Bayes Factors show moderate/strong evidence for either difference or no difference between the decoding curves and empty circles indicate insufficient evidence for either hypotheses. Thick lines show the average decoding accuracy across participants (error bars Standard Error across participants).

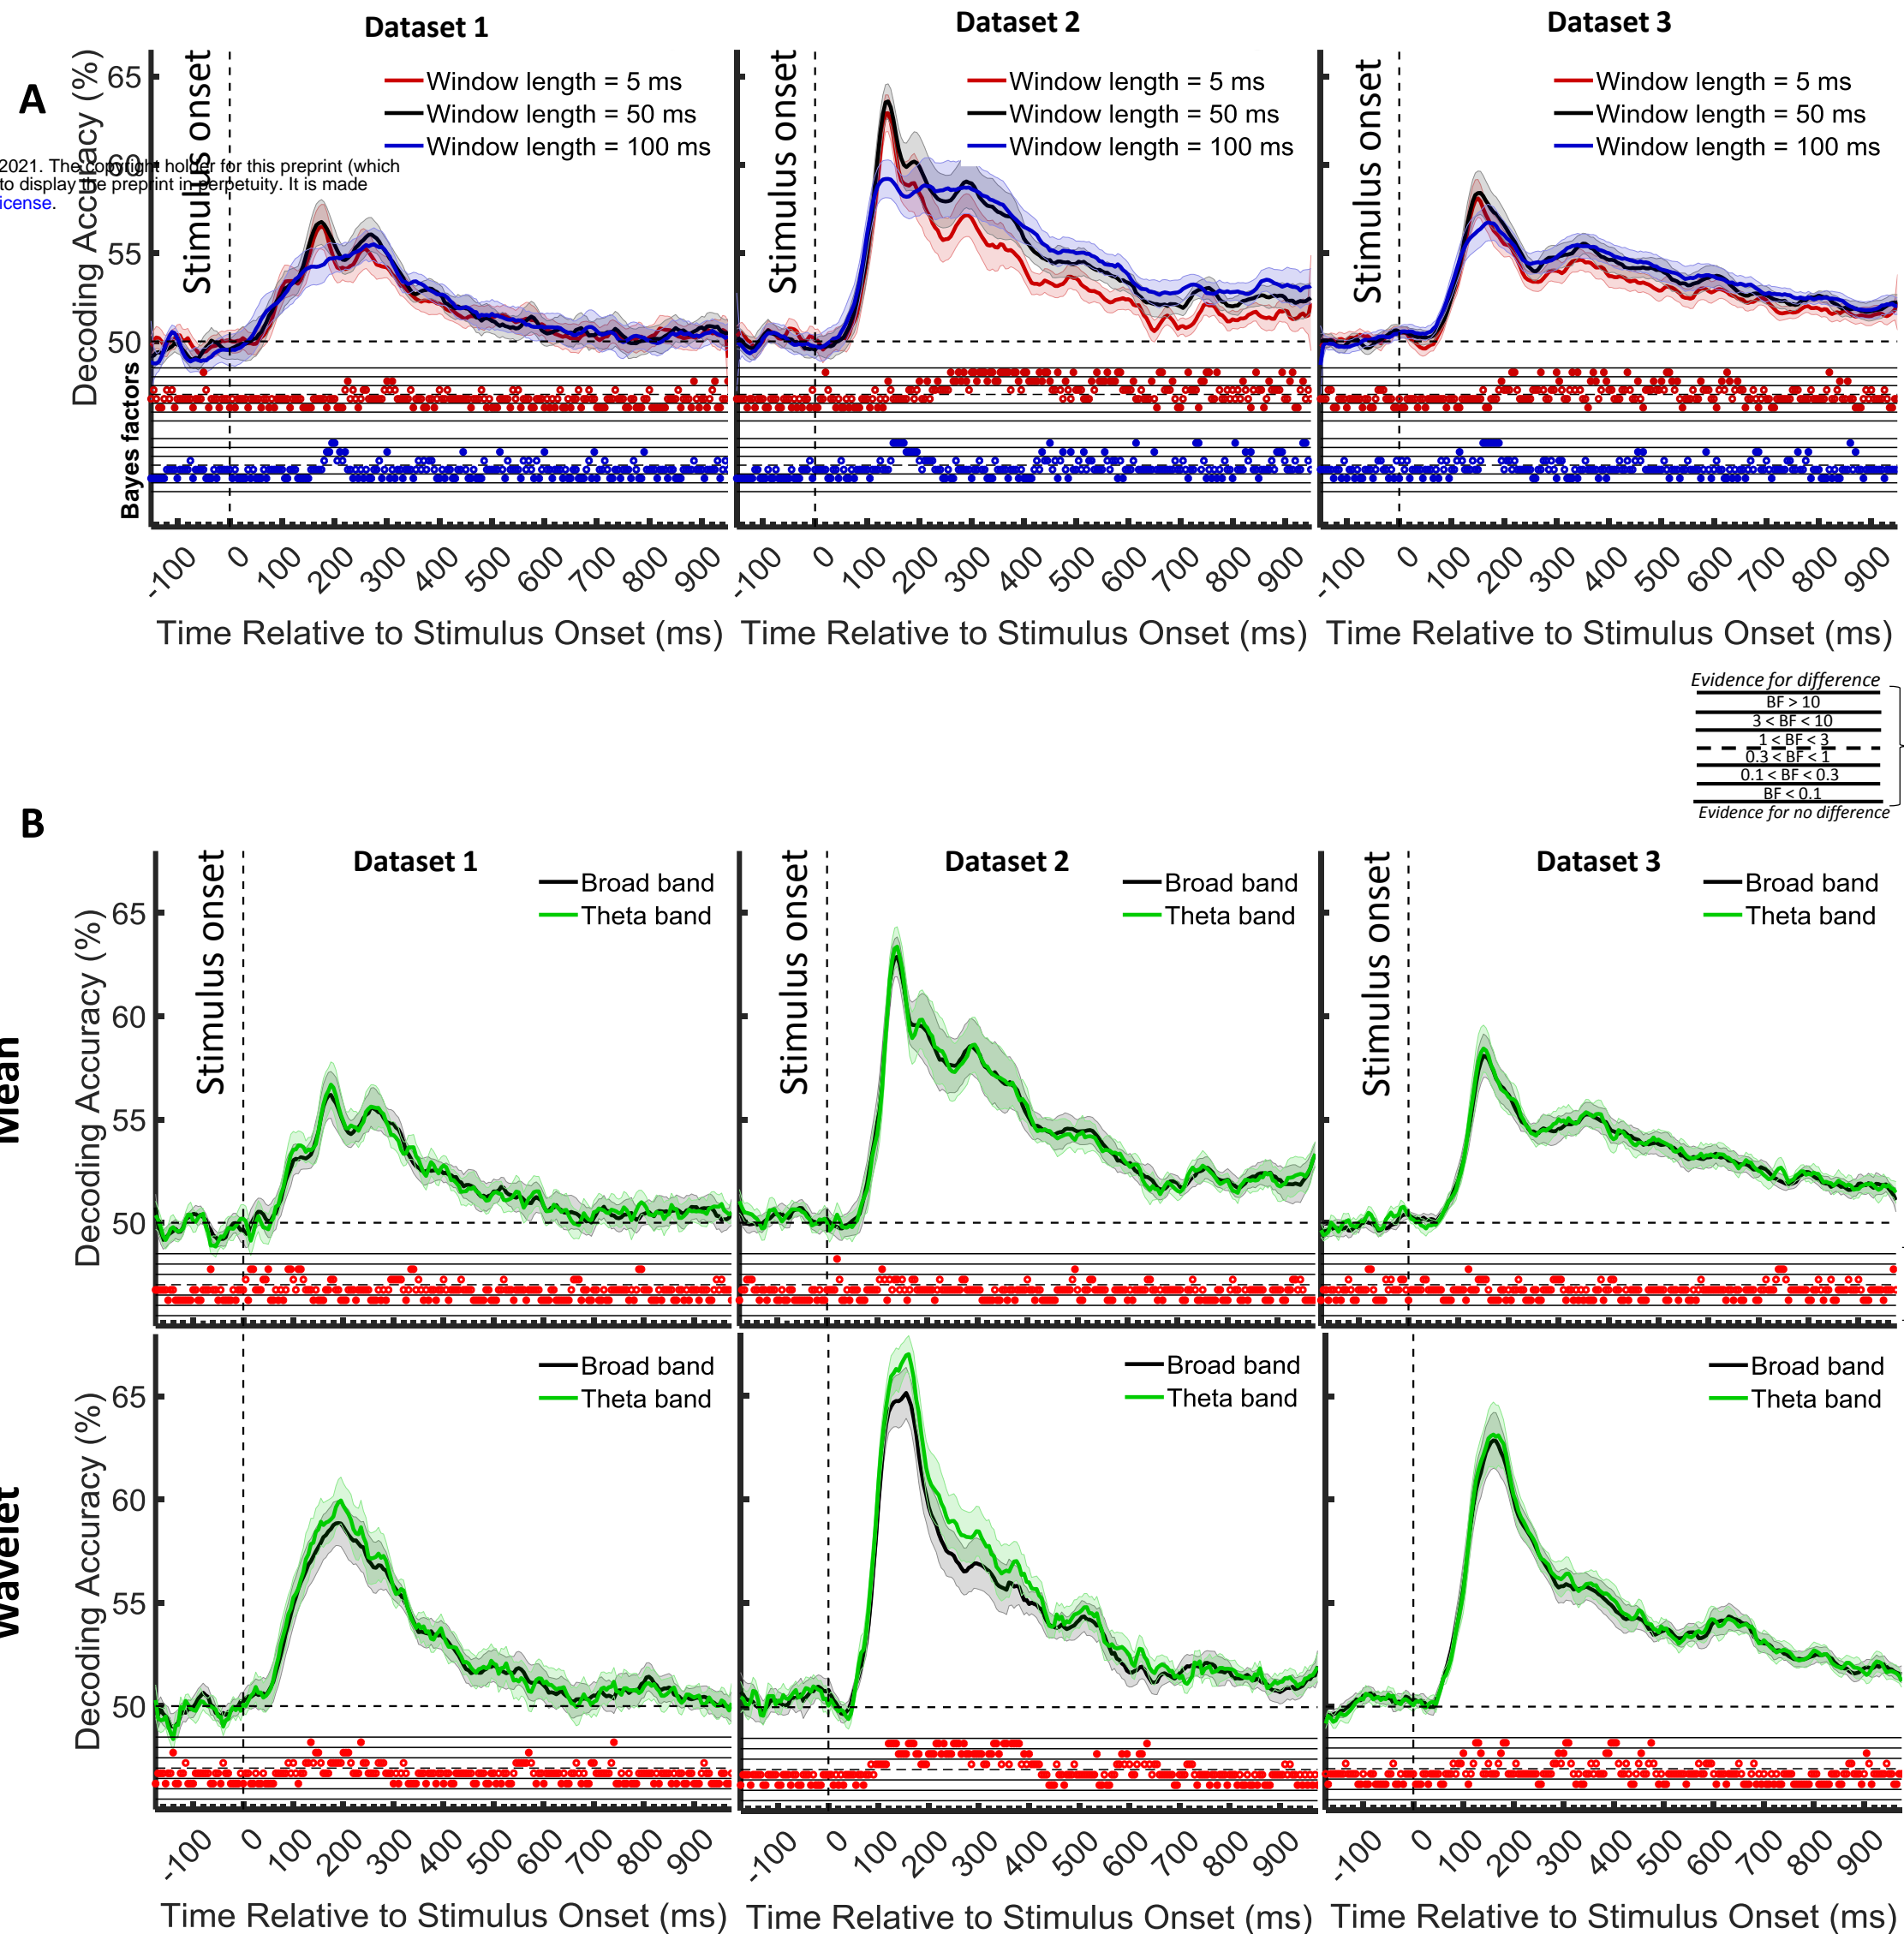



## Supplementary Figure 4

To see if that the Theta frequency band supports feed-forward flow of information in our datasets, we also calculated spatial maps of classifier weights on the head for the conventionally used **Mean feature** in the Theta frequency band. These classifier weights reflect how much information each electrode provides about object categories at different time points. The categorical object information initially appeared ~50 or ~100 ms after the stimulus onset in all three datasets predominantly in the occipital areas. This was followed in later time windows (~100 ms to ~150 ms) by the information appearing in both the occipital (all datasets), occipito-temporal (all datasets), central (Dataset 1) as well as frontal electrodes (all datasets). Finally, from around ~300 ms onwards, the object category information seemed to be dominantly represented in occipital and frontal (Datasets 1 and 3) areas or only the frontal (Dataset 2) area. These results seem to support feed-forward flow of information through the ventral and dorsal visual streams as well as from occipital to frontal brain areas during the trial. However, based on the limited spatial resolution of EEG and the susceptibility of classifier weights to artefacts (Haufe et al., 2014), we should be careful not to over-interpret these spatiotemporal maps.

Classifier weights in decoding. These topographic classifier maps were obtained from classifier weight values provided by the LDA classifiers used in decoding. The weight values have different scales for different datasets based on the nature of the data. Therefore, we normalized them for presentation within each dataset for clearer presentation. Hot colors show higher and cold colors reflect lower weights.

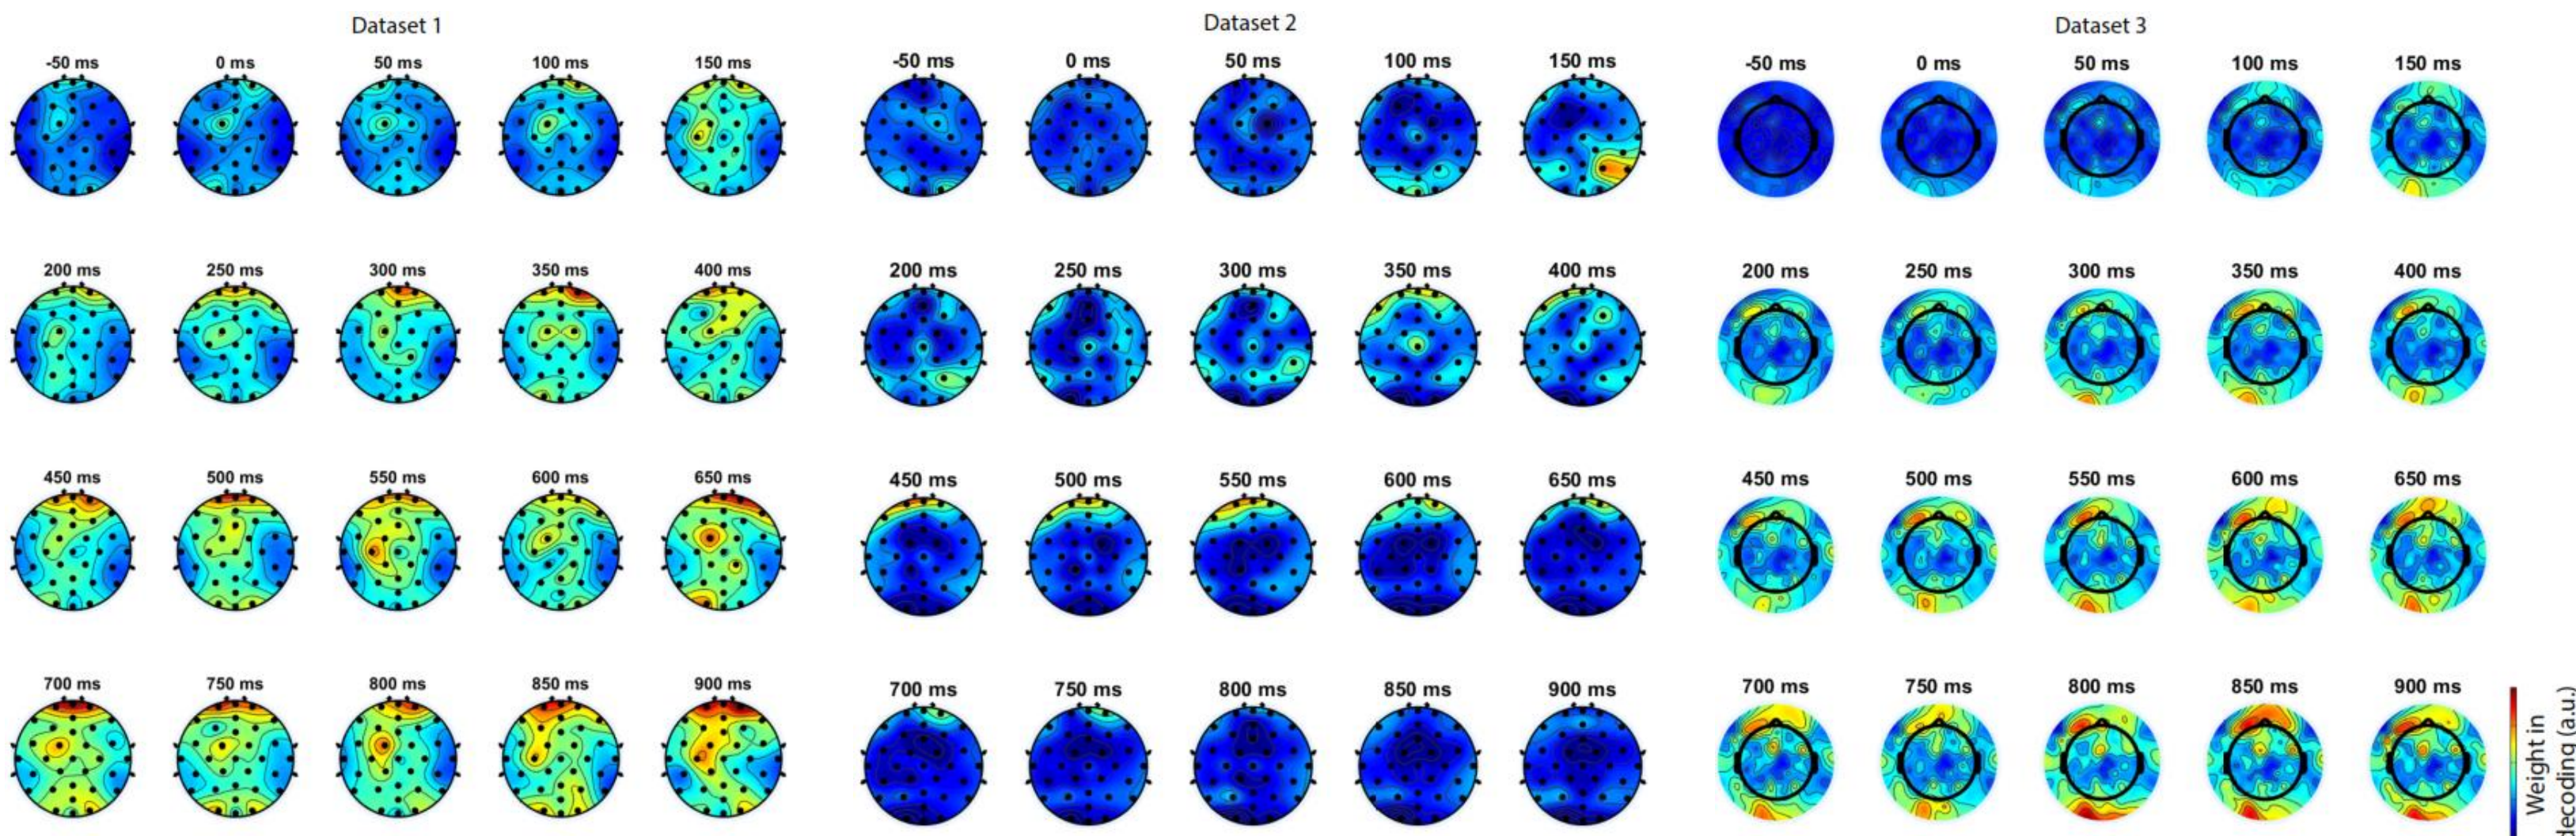

# Supplementary Figure 5

Time-resolved decoding of object categories from the three datasets using 28 features and Bayesian evidence analyses. Each row shows the results of one type of feature (i.e. moment, complexity, frequency, domain and multi-valued features from top to bottom, respectively). Curves show the average decoding across participants. Each column shows the results for one dataset. Top section in each panel shows the decoding accuracies across time and the bottom section shows the Bayes factor evidence for the difference of the decoding accuracy compared to chance-level decoding. The horizontal dashed lines on the top panel refer to chance-level decoding. Filled circles in the Bayes Factors show moderate/strong evidence for either difference or no difference from chance-level decoding and empty circles indicate insufficient evidence for either hypotheses.

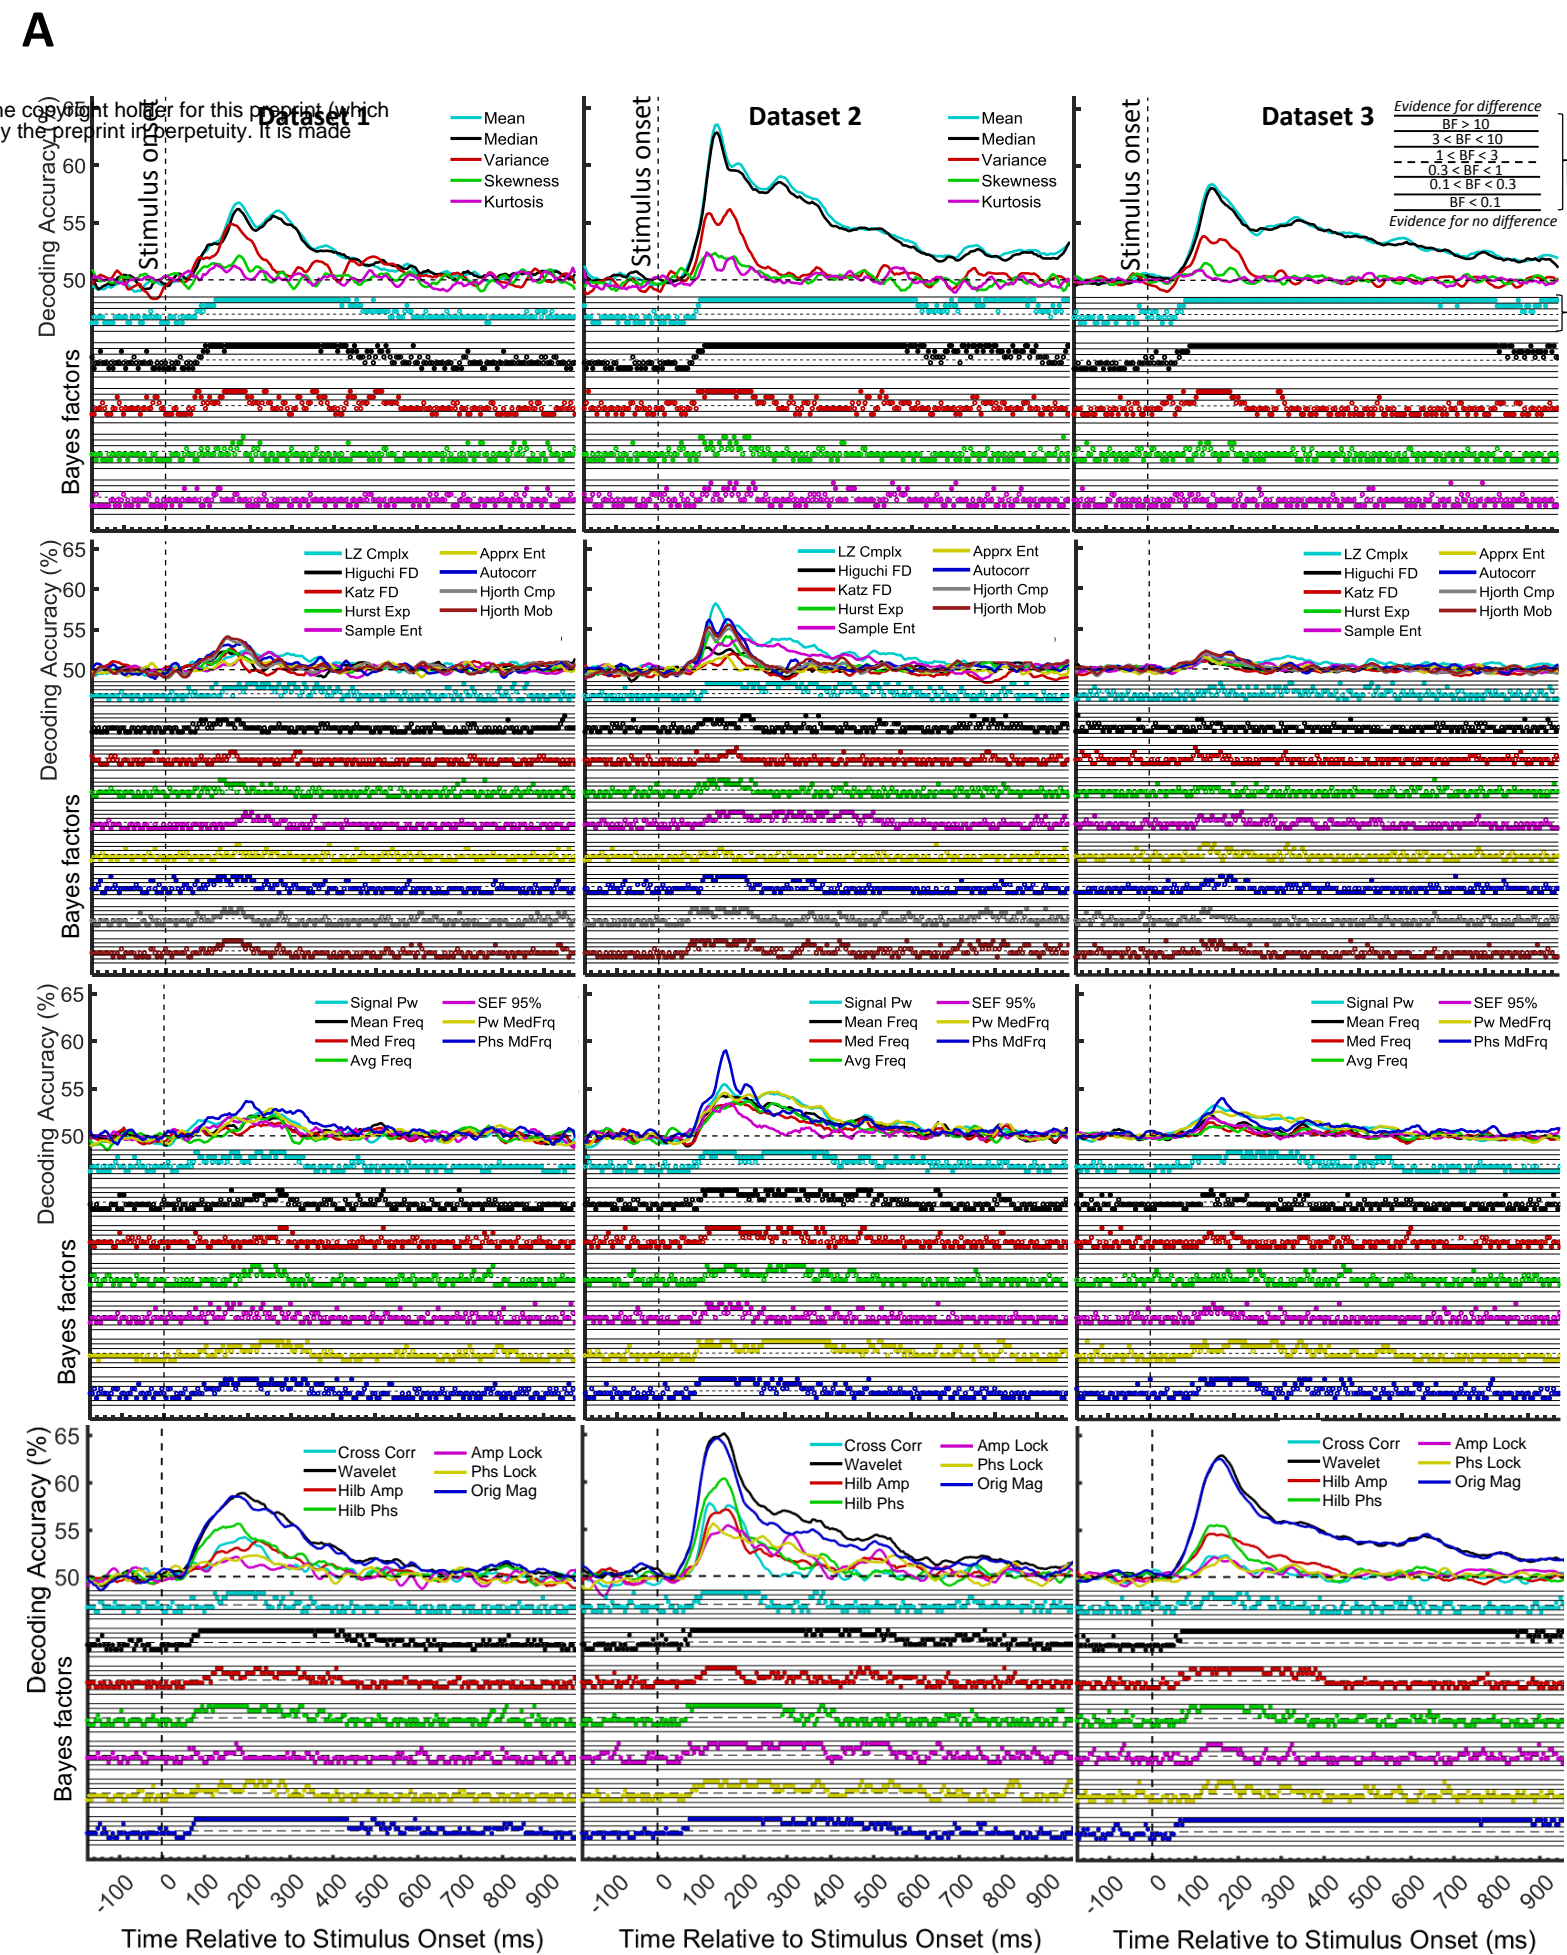

Timing and amplitude parameters extracted from the time-resolved accuracies of each feature and each dataset and their Bayesian evidence

analyses. (B-E) Left: the maximum and average decoding accuracies, the time of maximum and the first above-chance decoding. Thick bars show the average across participants (error bars Standard Error across participants). Bottom section on B and C show the Bayes factor evidence for the difference of the decoding accuracy compared to chance-level decoding; Right: matrices compare the right parameters obtained from different features. Different levels of evidence for existing difference (moderate  $3 < BF < 10$ , Orange; strong  $BF > 10$ , Yellow), no difference (moderate  $0.1 < BF < 0.3$ , light blue; strong  $BF < 0.1$ , dark blue) or insufficient evidence ( $1 < BF < 3$  green;  $0.3 < BF < 1$  Cyan) for either hypotheses. Black and red boxes show moderate or strong evidence for higher decoding values for specific features compared other sets of features as explained in the text. The horizontal dashed lines on the left panels of (B) and (D) refer to chance-level decoding. Filled circles in the Bayes Factors show moderate/strong evidence for either hypothesis and empty circles indicate insufficient evidence.

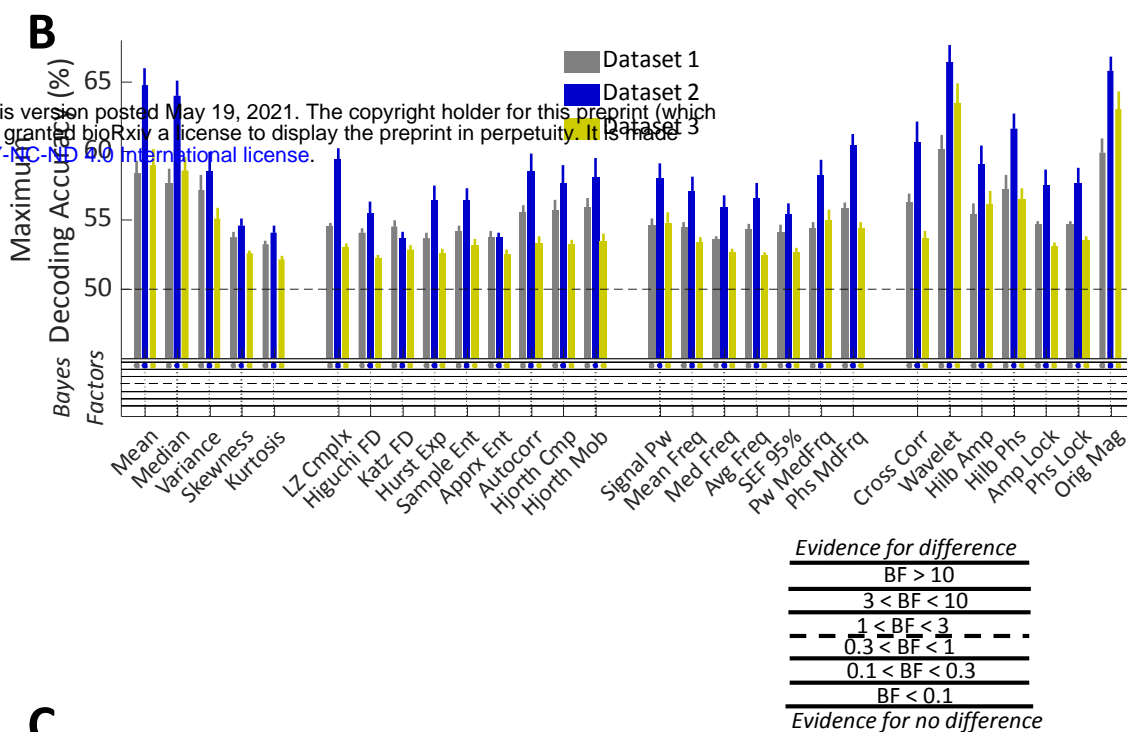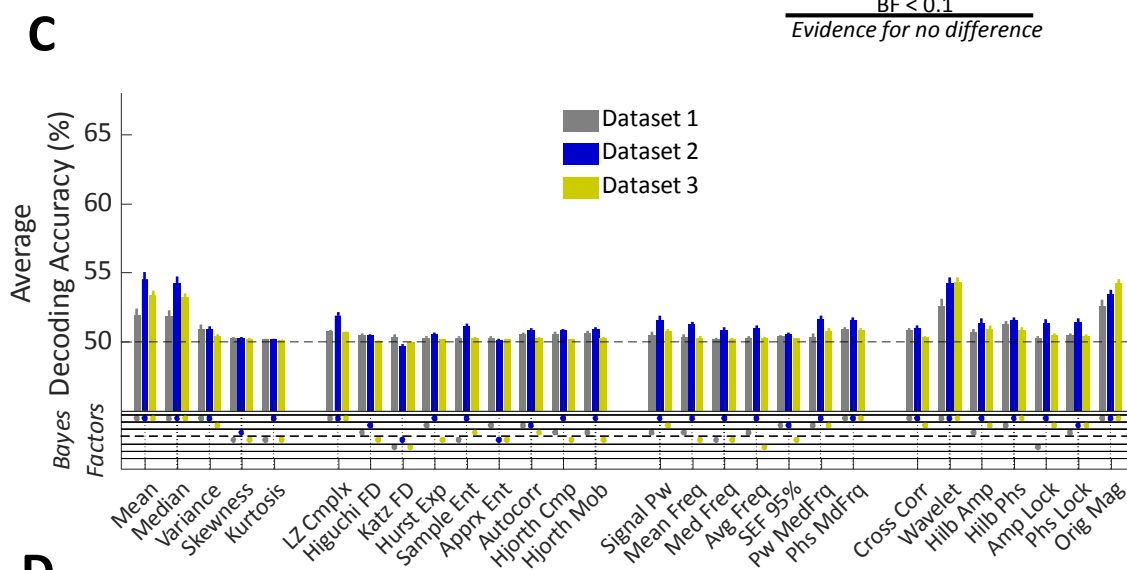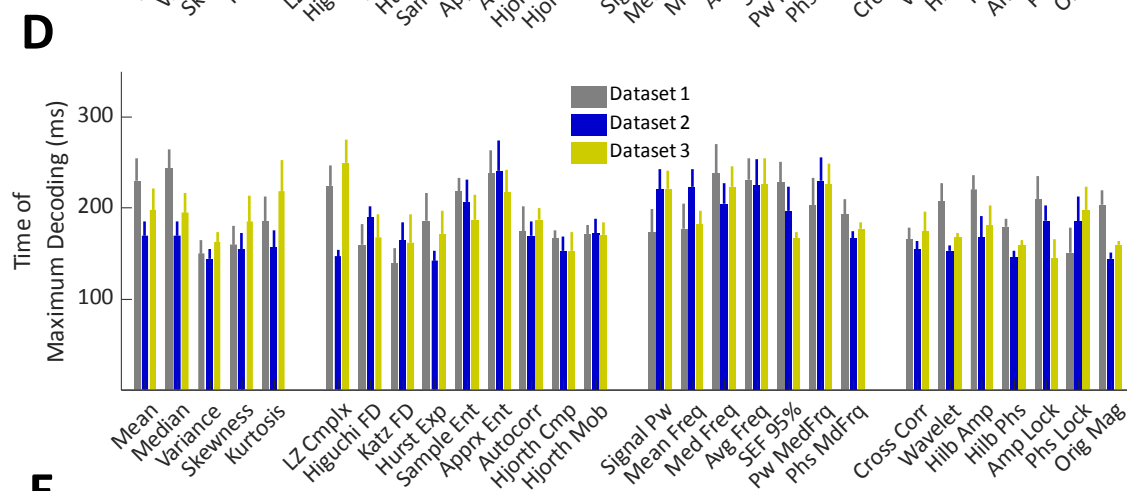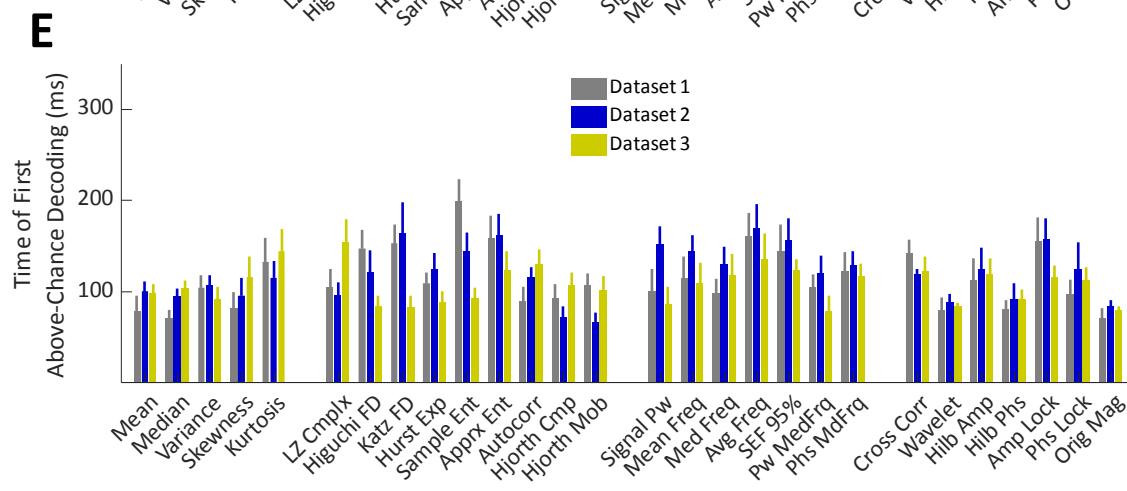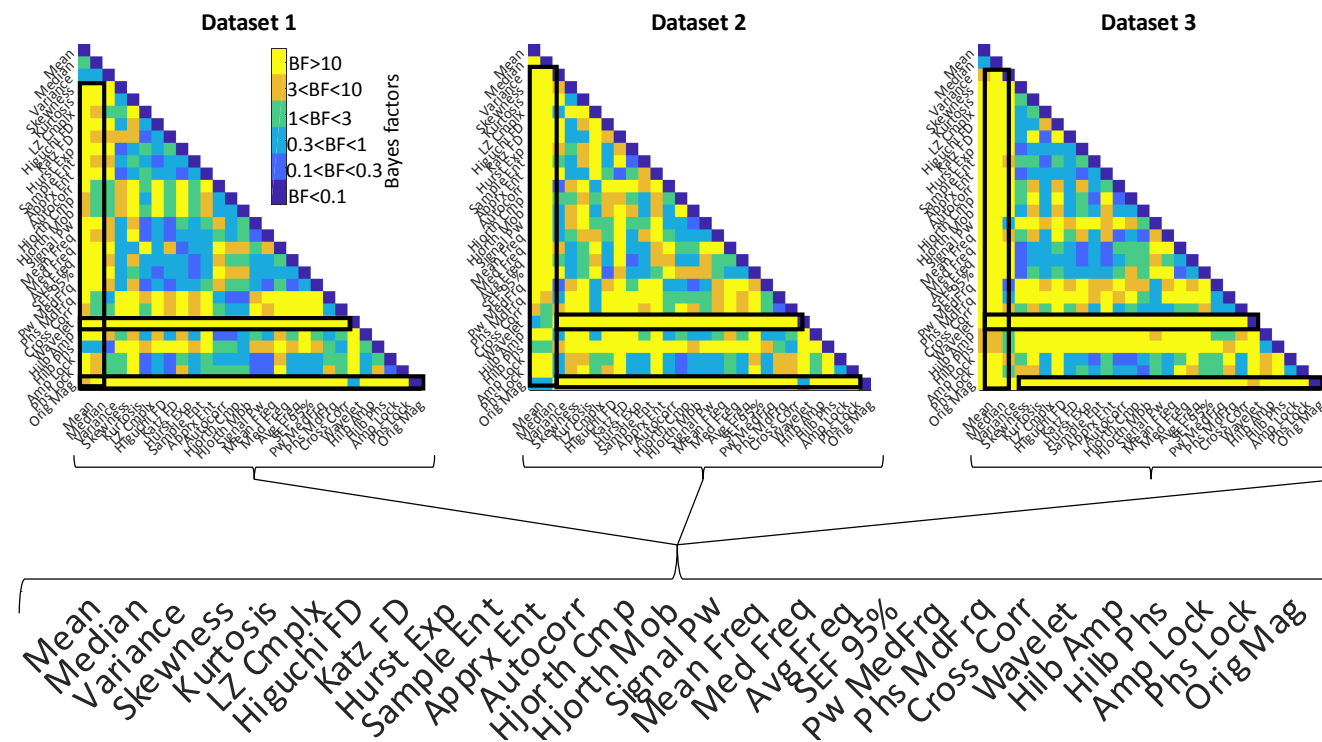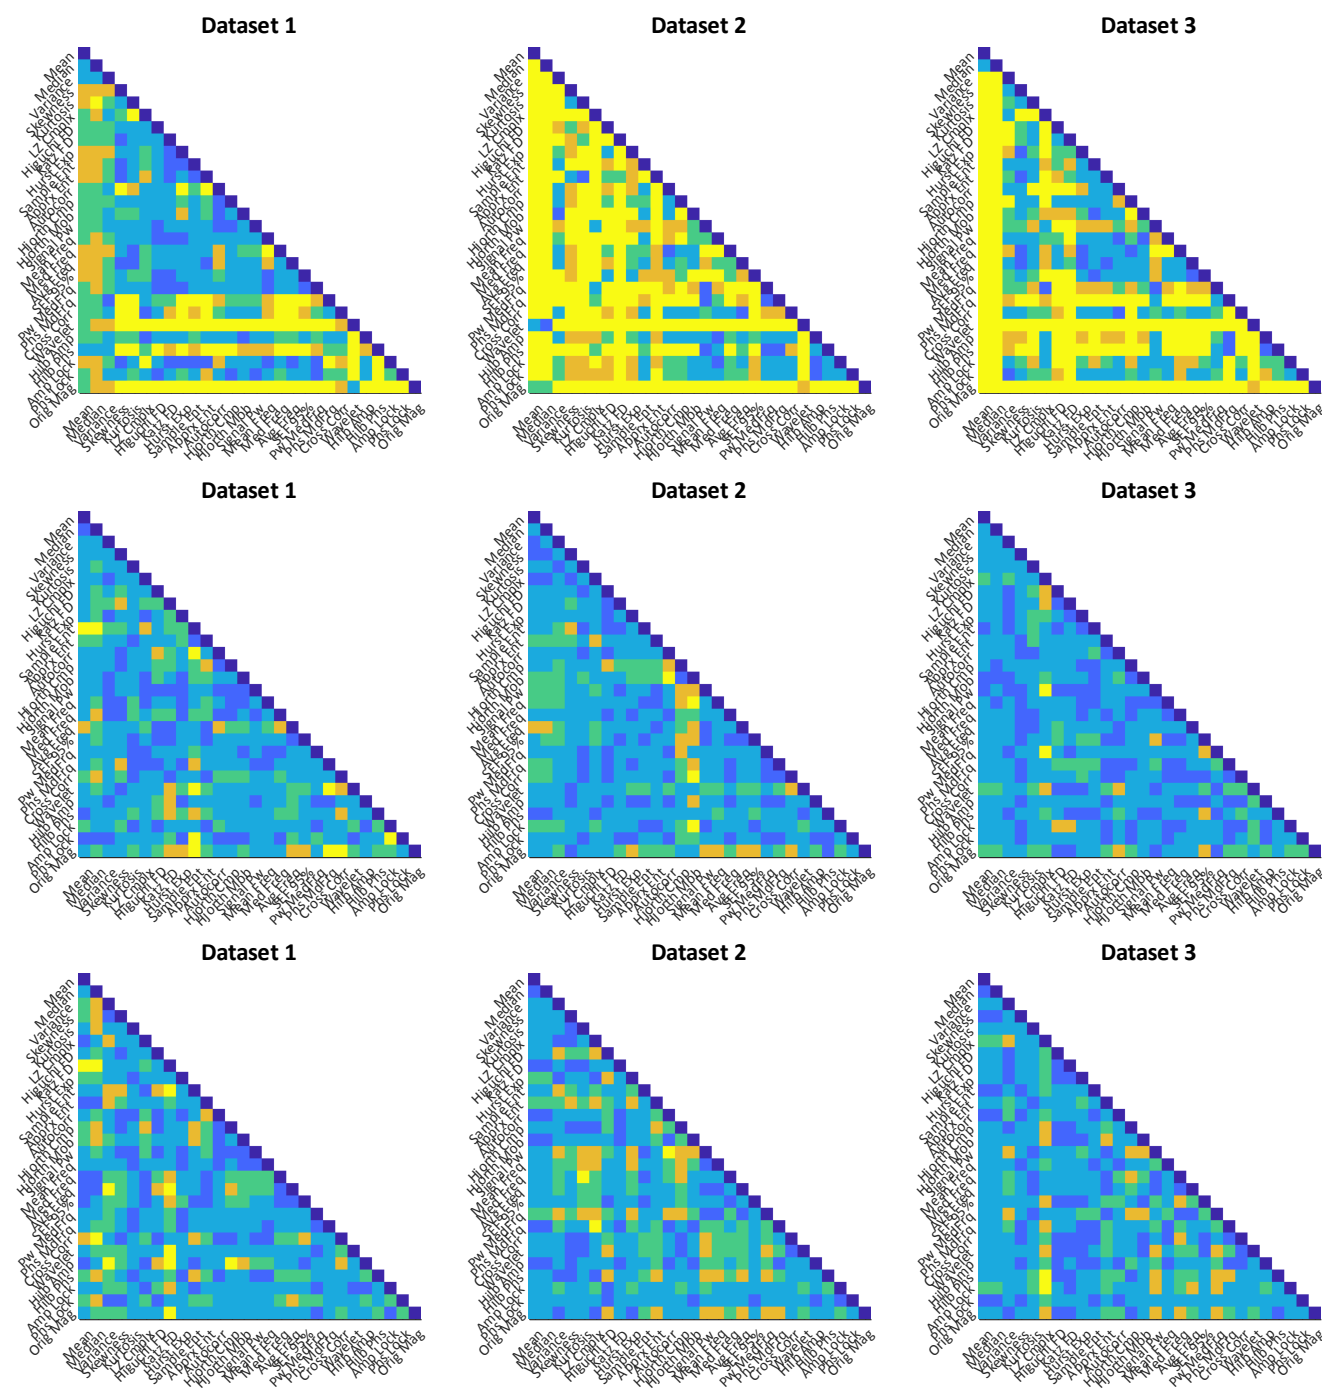

## Supplementary Figure 6

bioRxiv preprint doi: <https://doi.org/10.1101/2020.09.02.279042>; this version posted May 19, 2021. The copyright holder for this preprint (which was not certified by peer review) is the author/funder, who has granted bioRxiv a license to display the preprint in perpetuity. It is made available under aCC-BY-NC-ND 4.0 International license.

The temporal dynamics of different features seem to reflect a similar decoding pattern in the sense that the most informative features can lead to both a higher maximum decoding and a more sustained decoding pattern along the trial and vice versa. This suggests that there might be a general advantage for the more vs. less informative features which is reflected both in their maxima as well as their sustained decoding patterns. Alternatively, it can be the case that there is no relationship between the maxima and the average decoding across features, suggesting that each feature might detect different neural codes. To test this question, we calculated the correlation between the average and maximum decoding values for all features, which showed highly correlated results ( $r > 0.9$ ;  $p < 0.01$ ; Supplementary Figure 6A). This suggests that, all features followed a generally similar pattern of decoding with more informative features providing higher decoding maxima and a more sustained level of information decoding.

There has been no consensus yet about whether the time of the maximum or the first above-chance decoding reflects the speed of category processing in the brain (Grootswagers et al., 2017; Ritchie et al., 2015). Hence, we calculated the correlation of these temporal parameters across features to see if they both possibly reflect the dynamics of the same processing mechanism in the brain. The time of first above-chance and maximum decoding correlated in Datasets 2 and 3 but not Dataset 1 ( $r=0.67$ ,  $r=0.51$  and  $r=0.07$  respectively for Datasets 1, 2 and 3; Supplementary Figure 6B). Lack of significant correlation for Dataset 1 can be explained by the lower decoding values in Dataset 1 compared to the other datasets making the correlations noisier. Therefore, features that reached their above-chance decoding earlier also reached their maximum decoding earlier leading to the suggestion that they both reflect the temporal dynamics of the same cognitive processes with some delay.

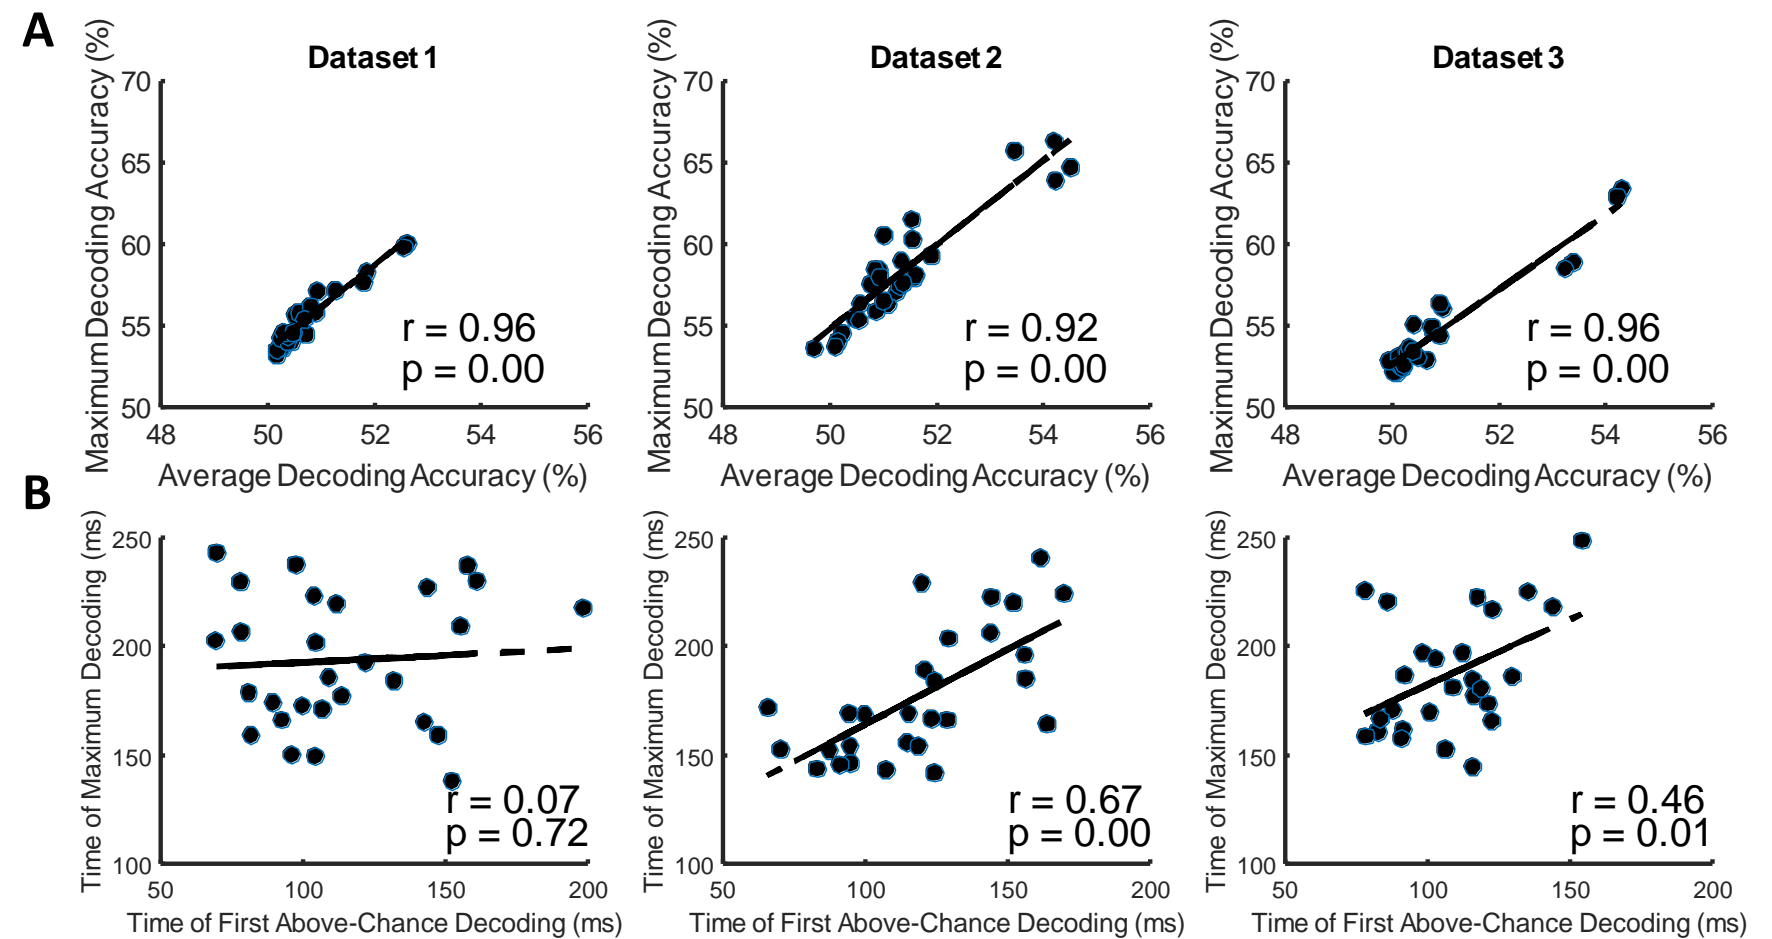

Correlation between the pairs of amplitude (A) and timing (B) parameters of the time-resolved decoding (i.e. maximum and average decoding accuracy and time of first and maximum decoding) for the set of  $N=28$  individual features. The slant line shows the best linear fit to the distribution of the correlation data.
